# Supplementary material for: Accelerated sex chromosome degeneration and mitonuclear coevolution in a brood parasitic bird
Source: Research Square preprint supplement (doi:10.21203/rs.3.rs-7330189/v1), 2025-09-12
Supplement: Supplementary file 1 [file 6b8b8d3fbd8cdeee380fa1ed.pdf]

**Table S1. Status of 78 W-linked protein-coding genes in focal species: summary.** Results for eight species, including four distinct W-chromosome lineages in cuckoo finch, with associated hosts labeled as in Fig. 1. The set of 78 potential Z-W gametologs was compiled from previous avian studies (Smeds et al., 2015; Xu et al., 2019) and W-chromosome annotations of the focal species (see Methods). For five genes, we found no evidence of a W-linked copy in any of our focal species. Nineteen genes were present only as pseudogenes or “remnant pseudogenes” in one or more taxa, whereas 54 genes had a putatively functional copy in one or more taxa. Genes that may remain functional despite apparent loss-of-function mutations in comparison to the consensus annotation for the Z-linked gametolog (i.e., “reduced, putatively functional”) include: SMAD4-W, which in cuckoo finches has a stop codon in an exon that is variably expressed in alternative transcripts of the Z-linked gametolog; 2) ZNF131-W, which in cuckoo finches has an early stop codon that shortens the implied protein by 34 amino acids; 3) FCHO2-W, which is clearly a pseudogene in seven of the eight species we analyzed, but in *Serinus* is missing only one long exon that is variably expressed in alternative transcripts of the Z-linked gametolog; and 4) HINT1-W, which appears to be substantially shorter than HINT1-Z in all eight species in our analysis.

| Species/lineage             | Status of W-linked gametolog      |                                             |                   |                               |                      |
|-----------------------------|-----------------------------------|---------------------------------------------|-------------------|-------------------------------|----------------------|
|                             | full-length,<br>functional<br>(F) | reduced,<br>putatively<br>functional<br>(f) | pseudogene<br>(P) | remnant<br>pseudogene<br>(RP) | entirely lost<br>(L) |
| <i>Agelaius</i> (Apho)      | 49                                | 1                                           | 9                 | 4                             | 15                   |
| <i>Molothrus</i> (Mate)     | 49                                | 1                                           | 11                | 4                             | 13                   |
| <i>Serinus</i> (Scan)       | 49                                | 2                                           | 7                 | 7                             | 13                   |
| <i>Taeniopygia</i> (Tgut)   | 36                                | 1                                           | 8                 | 7                             | 26                   |
| <i>Lonchura</i> (Lstr)      | 38                                | 1                                           | 6                 | 4                             | 29                   |
| <i>V. macroura</i> (Vmac)   | 43                                | 1                                           | 7                 | 5                             | 22                   |
| <i>V. chalybeata</i> (Vcha) | 41                                | 1                                           | 12                | 4                             | 20                   |
| <i>A. imberbis</i> _PB      | 28                                | 3                                           | 10                | 7                             | 30                   |
| <i>A. imberbis</i> _PR      | 28                                | 3                                           | 10                | 6                             | 31                   |
| <i>A. imberbis</i> _CE      | 27                                | 3                                           | 11                | 6                             | 31                   |
| <i>A. imberbis</i> _CJ      | 28                                | 3                                           | 10                | 6                             | 31                   |



| Gene       | Apho | Mate | Scan | Tgut | Lstr | Vmac | Vcha | Aimb_PB | Aimb_PR | Aimb_CE | Aimb_CJ | Notes |
|------------|------|------|------|------|------|------|------|---------|---------|---------|---------|-------|
| UBE2R2     | F    | F    | F    | F    | F    | F    | F    | F       | F       | F       | F       | 5     |
| VCP        | F    | F    | F    | F    | F    | F    | F    | F       | F       | F       | F       |       |
| ZFAND5     | F    | F    | F    | F    | F    | F    | F    | F       | F       | F       | F       |       |
| ZFR        | F    | F    | F    | F    | F    | F    | F    | F       | F       | F       | F       |       |
| ZNF131     | F    | F    | F    | F    | F    | F    | F    | f95     | f95     | f95     | f95     |       |
| ZSWIM6     | F    | F    | F    | F    | F    | F    | F    | F       | F       | F       | F       | 6     |
| BTF3       | F    | F    | F    | F    | F    | F    | F    | L       | L       | L       | L       |       |
| CDC37L1    | F    | F    | F    | P90  | F    | L    | P90  | L       | L       | L       | L       |       |
| CERT1      | F    | F    | F    | L    | L    | F    | F    | F       | F       | F       | F       |       |
| CTIF       | F    | F    | F    | RP10 | RP13 | L    | L    | L       | L       | L       | L       |       |
| CWH18orf32 | F    | F    | F    | F    | F    | F    | F    | L       | L       | L       | L       | 7     |
| FAM219A    | F    | F    | F    | P47  | P53  | RP29 | L    | RP28    | RP28    | RP28    | RP28    |       |
| FCHO2      | P73  | P83  | f83  | P51  | RP6  | P60  | P60  | L       | L       | RP9     | RP9     |       |
| FEM1C      | F    | F    | F    | P71  | P100 | F    | F    | L       | L       | L       | L       |       |
| HOMER1     | F    | F    | P49  | L    | L    | L    | L    | RP24    | RP24    | RP15    | RP15    |       |
| KIF2A      | F    | F    | F    | F    | P88  | P45  | P73  | P46     | P46     | P46     | P46     | 8     |
| MACIR      | L    | L    | F    | L    | L    | L    | L    | L       | L       | L       | L       |       |
| MAP1B      | F    | F    | F    | F    | F    | F    | F    | P100    | P100    | P100    | P100    |       |
| MEX3C      | F    | F    | F    | P100 | P85  | F    | F    | P88     | P88     | L       | L       |       |
| MRPS36     | F    | F    | F    | F    | F    | F    | F    | P88     | P88     | P88     | P88     |       |
| PAIP1      | F    | F    | F    | P71  | F    | F    | F    | P100    | P100    | P100    | P100    | 9     |
| PIAS2      | F    | F    | RP33 | L    | L    | F    | P93  | P71     | P71     | P71     | P71     |       |
| PRKAA1     | F    | F    | F    | P92  | P92  | F    | F    | P100    | P100    | P100    | P100    |       |
| RPL17      | F    | F    | F    | P100 | F    | F    | F    | L       | L       | L       | L       |       |
| SCAMP1     | F    | F    | F    | L    | L    | P84  | P84  | L       | L       | L       | L       |       |
| SLC25A51   | F    | F    | F    | F    | P100 | F    | 100  | P100    | P100    | P100    | P100    | 10    |
| SMAD7      | F    | F    | F    | L    | L    | L    | L    | L       | L       | L       | L       |       |
| SNX18      | L    | L    | F    | F    | F    | F    | F    | L       | L       | L       | L       |       |



**Notes:**

- 1 DCAF12: a longer Z-linked annotation (Tgut, XP\_030113358.1; 1,440bp over 9 coding regions) implies a non-functional W-linked gene in all taxa; thus, we used a slightly shorter annotation for the Z-linked gene (Tgut, XP\_030113359.1; 1,371bp over 9 coding intervals) as the model for the W-linked gene. The latter annotation is consistent with annotations for a broad diversity of birds and is presumably the best consensus annotation for the gene.
- 2 HINT1-Z has three coding regions totaling 381bp, but applying the annotation for the Z-linked gene (Tgut, NP\_001139032.1) implies a non-functional W-linked gene in all taxa. Thus, we infer that HINT1-W is reduced in length in comparison to the Z-linked gene, consistent with documented W-linked transcripts in Tgut (ACH45037.1) and Vcha (XM\_053933340.1).
- 3 RASA1: first coding region lost from the W-linked gene in the cuckoo finch *Cisticola erythropus* lineage ("Aimb\_CE") only.
- 4 Cuckoo finch SMAD4-W has a stop codon in one exon that is variably expressed in alternative transcripts for the Z-linked gametolog; compare XP\_053824863.1 and XP\_053824864.1 in Vcha. Thus, the shorter transcript may remain functional in cuckoo finch. The same exon appears to be missing from SMAD4-Z in the estrildid finches (Tgut and Lstr), a rare case of "degeneration" in a Z-linked gene (see also notes 8 and 9 below).
- 5 Cuckoo finch ZNF131-W has an early stop codon that shortens the implied protein by 34 codons in comparison to other songbirds; thus, the W-linked gene may remain functional but potential effects on phenotype/fitness are unknown.
- 6 FCHO2-W is clearly a pseudogene in seven of the eight species we analyzed, but in the canary, it is missing just one long exon that is variably expressed in transcripts for the Z-linked gametolog (compare XP\_030114946.3 and XP\_030114951.3 in Tgut). Thus, a shorter W-linked transcript may remain functional in canary.
- 7 FEM1C: the W-chromosome assemblies for Vcha and Vmac include two identical or nearly identical copies of this gene in close proximity, whereas the Tgut W-chromosome includes two incomplete copies of the gene.
- 8 MACIR: the Z-linked copy of this gene has a frameshift mutation in Lstr that presumably renders the gene non-functional; this is one of two examples we detected (see next note) of loss or pseudogenization of a Z-linked gene.
- 9 MEX3C: the genome assemblies for Tgut, Lstr, and Aimb lack a Z-linked copy of this gene, and we failed to assemble Z-linked copies of these genes from re-sequencing data for these species. The Z-linked gene is characterized by extreme GC-content (~72-74% in coding regions), perhaps making it difficult to assemble. However, we note that species missing the Z-linked gene also have non-functional or missing W-linked copies of this gene. See *Rissa tridactyla* XP\_054042183 for shorter annotation ("MMAAML...").
- 10 RPL17: examination of alignments and phylogenies suggest an apparent case of gene conversion involving the transfer of two exons from RPL17-Z to RPL17-W in the *Vidua* lineage (see fig. S4).

**Table S3. Summary of PAML results for different sets of sex-linked, autosomal and OXPHOS-related genes.**  $dN$  and  $dN/dS$  estimates from the “VA” model (see fig. S9), which assumes different  $dN/dS$  rates for the outgroup (“out”), *Vidua* and *Anomalospiza* (“Aimb”), respectively, are shown along with the percentage difference in rate for *Anomalospiza* relative to *Vidua*. Differences greater than 30% are highlighted in blue, which corresponds to gene sets with significantly higher  $dN/dS$  in *Anomalospiza* than in *Vidua*. Results for the mitochondrial 12S, 16S and tRNA genes are expressed as substitutions per site ( $d$ ), with rate differences tested using baseml rather than codeml. The best model (see fig. S9) and its  $\Delta AICc$  value relative to the null model is shown with up and down arrows indicating whether the rate in *Vidua* (**V**) and/or *Anomalospiza* (**A**) is higher or lower, respectively, than in the outgroup. Gene sets are described in notes provided below the table.

| gene set <sup>1</sup> | genomic location | #genes | $dN$ (or $d^*$ for non-coding genes) |        |            | $dN/dS$ |        |        |            | best model | $\Delta AICc$ |
|-----------------------|------------------|--------|--------------------------------------|--------|------------|---------|--------|--------|------------|------------|---------------|
|                       |                  |        | Vidua                                | Aimb   | ±% in Aimb | out     | Vidua  | Aimb   | ±% in Aimb |            |               |
| 29W                   | W-chr            | 29     | 0.0023                               | 0.0044 | 88%        | 0.1872  | 0.2136 | 0.3107 | 45%        | A↑         | 18.3          |
| 29Z                   | Z-chr            | 29     | 0.0014                               | 0.0035 | 145%       | 0.0597  | 0.0663 | 0.1322 | 99%        | A↑         | 42.3          |
| 48Z                   | Z-chr            | 48     | 0.0044                               | 0.0059 | 35%        | 0.1531  | 0.1897 | 0.2592 | 37%        | V↑A↑       | 52.1          |
| PAR                   | ZW-chrs          | 16     | 0.0043                               | 0.0058 | 36%        | 0.1617  | 0.1876 | 0.2590 | 38%        | A↑         | 15.8          |
| Z-control             | Z-chr            | 106    | 0.0068                               | 0.0065 | -5%        | 0.2162  | 0.2678 | 0.2493 | -7%        | A↑V↑       | 3.8           |
| 13mt                  | mt               | 13     | 0.0244                               | 0.0307 | 26%        | 0.0309  | 0.0388 | 0.0516 | 33%        | V↑A↑       | 70.4          |
| Complex I: mt         | mt               | 7      | 0.0345                               | 0.0400 | 16%        | 0.0420  | 0.0563 | 0.0744 | 32%        | V↑A↑       | 64.1          |
| Complex I: nuc        | nuc              | 37     | 0.0046                               | 0.0103 | 125%       | 0.1824  | 0.1978 | 0.4842 | 145%       | V↑A↑       | 58.5          |
| Complex II: nuc       | nuc              | 4      | 0.0048                               | 0.0066 | 37%        | 0.0797  | 0.0590 | 0.0806 | 37%        | null       | –             |
| Complex III: mt       | mt               | 1      | 0.0138                               | 0.0120 | -13%       | 0.0240  | 0.0233 | 0.0157 | -33%       | V↓         | 0.38          |
| Complex III: nuc      | nuc              | 11     | 0.0017                               | 0.0020 | 20%        | 0.2164  | 0.2064 | 0.2040 | -1%        | null       | –             |
| Complex IV: mt        | mt               | 3      | 0.0078                               | 0.0167 | 116%       | 0.0121  | 0.0108 | 0.0250 | 131%       | A↑         | 12.9          |
| Complex IV: nuc       | nuc              | 13     | 0.0076                               | 0.0124 | 63%        | 0.2166  | 0.2233 | 0.3733 | 67%        | A↑         | 1.66          |
| Complex V: mt         | mt               | 2      | 0.0321                               | 0.0406 | 26%        | 0.0307  | 0.0478 | 0.0554 | 16%        | P↑         | 1.65          |
| Complex V: nuc        | nuc              | 18     | 0.0028                               | 0.0070 | 153%       | 0.0993  | 0.1165 | 0.2297 | 97%        | A↑         | 14.3          |
| 12S rRNA*             | mt               | 1      | 0.0283                               | 0.0664 | 135%       | –       | –      | –      | –          | A↑         | 11.6          |
| MRPS                  | Nuc              | 29     | 0.0070                               | 0.0093 | 32%        | 0.2482  | 0.2586 | 0.3672 | 42%        | A↑         | 5.64          |
| 16S rRNA*             | mt               | 1      | 0.0340                               | 0.0447 | 32%        | –       | –      | –      | –          | A↑         | 1.83          |
| MRPL                  | nuc              | 48     | 0.0068                               | 0.0074 | 8%         | 0.1984  | 0.2191 | 0.2459 | 12%        | P↑         | 3.03          |
| mt tRNAs*             | mt               | 22     | 0.0491                               | 0.0754 | 53%        | –       | –      | –      | –          | A↑         | 6.58          |
| aaRS                  | nuc              | 22     | 0.0045                               | 0.0053 | 16%        | 0.1818  | 0.1874 | 0.2097 | 12%        | null       | –             |
| NADHD assembly        | nuc              | 8      | 0.0073                               | 0.0088 | 19%        | 0.2727  | 0.3162 | 0.3681 | 16%        | P↑         | 1.88          |
| COX assembly          | nuc              | 16     | 0.0072                               | 0.0064 | -11%       | 0.2370  | 0.3080 | 0.2376 | -23%       | null       | –             |
| Co Q10 assembly       | nuc              | 12     | 0.0046                               | 0.0060 | 30%        | 0.2172  | 0.2140 | 0.2383 | 11%        | null       | –             |

| gene set <sup>1</sup> | genomic location | #genes | dN     |        |            | dN/dS  |        |        |            | best model | ΔAICc       |
|-----------------------|------------------|--------|--------|--------|------------|--------|--------|--------|------------|------------|-------------|
|                       |                  |        | Vidua  | Aimb   | ±% in Aimb | Out    | Vidua  | Aimb   | ±% in Aimb |            |             |
| A-control             | nuc              | 102    | 0.0033 | 0.0034 | 5%         | 0.1529 | 0.1505 | 0.1637 | 9%         | null       | –           |
| V-type ATPases        | nuc              | 24     | 0.0020 | 0.0019 | -6%        | 0.0995 | 0.0837 | 0.0865 | 3%         | null       | –           |
| P-type ATPases        | nuc              | 38     | 0.0026 | 0.0028 | 7%         | 0.1112 | 0.1062 | 0.1029 | -3%        | P↓         | 0.72        |
| neuro-related         | nuc              | 59     | 0.0025 | 0.0031 | 26%        | 0.1446 | 0.1242 | 0.1448 | 17%        | V↓         | <b>4.25</b> |
| social behavior       | nuc              | 56     | 0.0032 | 0.0031 | -4%        | 0.1047 | 0.1280 | 0.1118 | -13%       | <b>V↑</b>  | <b>12.6</b> |
| egg production        | nuc              | 18     | 0.0043 | 0.0048 | 11%        | 0.2507 | 0.2150 | 0.2332 | 8%         | V↓A↓       | <b>2.49</b> |

#### Notes:

##### 1 Gene sets:

29W = W-linked genes with putatively functional copies in all eight species analyzed

29Z = the Z-linked gametologs of the “29W” genes

48Z = Z-linked genes with lost or non-functional W-linked gametologs in one or more of the eight species analyzed

16PAR = genes in the pseudoautosomal region shared by the Z- and W-chromosomes

Z-control = a control set of 106 Z-linked genes not known to have a W-linked gametolog in any songbird

13mt = the 13 mitochondrial protein-coding genes combined

Complexes I-V mt/nuc = the mitochondrial and nuclear genes coding for components of respiratory complexes I through V

12S = the mitochondrial 12S ribosomal RNA gene

MRPS = nuclear-encoded small ribosomal subunit proteins

16S = the mitochondrial 16S ribosomal RNA gene

MRPS = nuclear-encoded large ribosomal subunit proteins

mt tRNAs = mitochondrial tRNA genes

aaRS = aminoacyl-tRNA synthetase genes

NADHD assembly, COX assembly, Co Q10 assembly = proteins involved, respectively, in the assembly of respiratory complexes I and IV and Coenzyme Q10

A-control = a control set of 102 autosomal genes

V-type ATPases = subunits of the vacuolar-type ATPase (<https://www.genenames.org/data/genegroup/#!/group/415>)

P-type ATPases = members of the P-type ATPase gene family (<https://www.genenames.org/data/genegroup/#!/group/414>)

neuro-related = neuro-related genes previously found to be accelerated in zebra finch relative to chicken (Nam et al. 2010)

social behavior = genes putatively involved in parental care and/or social behavior generally (e.g., Lopes & de Bruijn 2021; Lynch et al. 2019, 2020)

egg production = genes putatively associated with egg production in galliforms or anseriforms (Mishra et al. 2020; Bhavana et al. 2022)

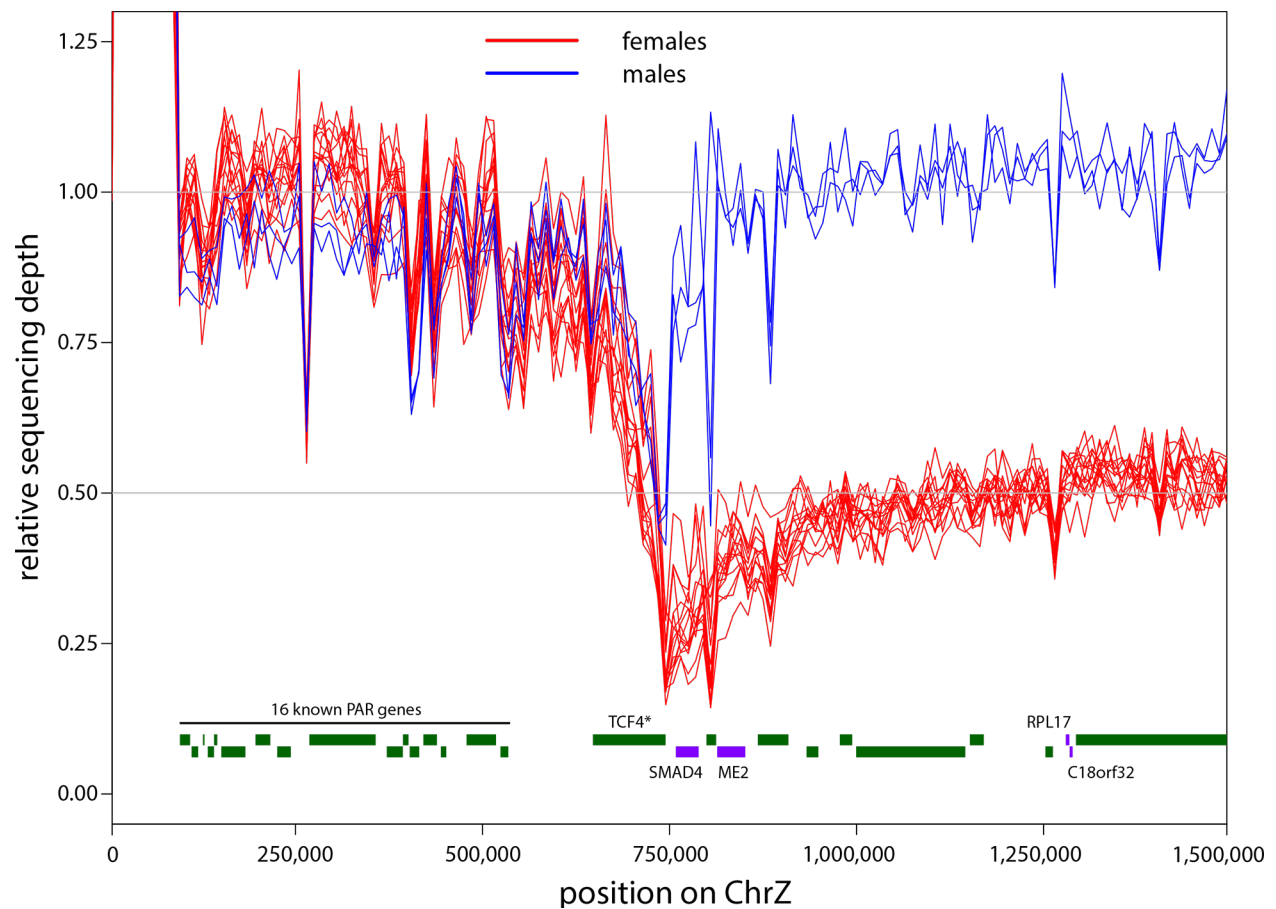

**Supplementary Fig. 1 | Male versus female sequencing depth across the pseudoautosomal region and adjacent portion of the Z-chromosome.** Sequencing depth for 10 kbp windows, expressed as a function of median autosomal sequencing depth per sample, for four male and 15 female Cameroon indigobirds *Vidua camerunensis*. The location of annotated protein-coding genes is indicated in green or purple, the latter identifying genes with W-linked gametologs in at least some songbirds. We failed to assemble the TCF4 gene in most species, but this region is characterized by extreme GC content.
