# Supplementary material for: Accelerated sex chromosome degeneration and mitonuclear coevolution in a brood parasitic bird
Source: Research Square preprint supplement (doi:10.21203/rs.3.rs-7330189/v1), 2025-09-12
Supplement: Supplementary file 1 [file faf3c5edfabd7c471263ef32.xlsx]

## Sheet: Supp. Table 4 WGS samples
Supplementary Table 4. Samples used for whole-genome re-sequencing including GenBank accession numbers.
Species	sample	sex	paired reads	read-length	~depth	BioProject	BioSample	SRA	mtDNA	host	origin	reference	egg phenptype/notes
Anomalospiza imberbis	2012JUN005A1	F	101711206	151	25.5973	PRJNA1258568	SAMN26171989	SRR33418171	PV690495	Cisticola_juncidis	Choma, Zambia	this study	white
Anomalospiza imberbis	2012JUN006A1	F	60665646	150	15.1664	PRJNA1258568	SAMN26171990	SRR33418169	PV690496	Cisticola_juncidis	Choma, Zambia	this study	white
Anomalospiza imberbis	2012PS024A1	F	73606086	151	18.5242	PRJNA1258568	SAMN26171994	SRR33418173	PV690497	Prinia_subflava	Choma, Zambia	this study	red
Anomalospiza imberbis	2012PS093A2	F	71026856	151	17.8751	PRJNA1258568	SAMN26171999	SRR33418172	PV690498	Prinia_subflava	Choma, Zambia	this study	blue
Anomalospiza imberbis	2012PS129	F	161441523	151	40.6294	PRJNA1258568	SAMN26172004	SRR33418161	PV690499	Prinia_subflava	Choma, Zambia	this study	red
Anomalospiza imberbis	2012PS134A2	F	82031180	151	20.6445	PRJNA1258568	SAMN26172005	SRR33418160	PV690500	Prinia_subflava	Choma, Zambia	this study	blue
Anomalospiza imberbis	2013_PS171A1	F	52948044	150	13.237	PRJNA1258568	SAMN26172039	SRR33418159	PV690504	Prinia_subflava	Choma, Zambia	this study	red
Anomalospiza imberbis	2013_PS179	F	62871694	150	15.7179	PRJNA1258568	SAMN26172041	SRR33418158	PV690505	Prinia_subflava	Choma, Zambia	this study	blue
Anomalospiza imberbis	2013ERY045A2	F	92524970	151	23.2855	PRJNA1258568	SAMN26172029	SRR33418168	PV690501	Cisticola_erythrops	Choma, Zambia	this study	bright* inferred from mtDNA
Anomalospiza imberbis	2013JUN006	F	68118314	151	17.1431	PRJNA1258568	SAMN26172030	SRR33418170	PV690502	Cisticola_juncidis	Choma, Zambia	this study	white; sample mislabed "2012JUN006" in data files
Anomalospiza imberbis	2013PS082A1	F	95373861	151	24.0024	PRJNA1258568	SAMN26172036	SRR33418157	PV690503	Prinia_subflava	Choma, Zambia	this study	red
Anomalospiza imberbis	2014JUN21A1	F	91625083	151	23.059	PRJNA1258568	SAMN26172061	SRR33418167	PV690507	Cisticola_juncidis	Choma, Zambia	this study	white
Anomalospiza imberbis	2014JUN22A1	F	62162544	151	15.6442	PRJNA1258568	SAMN26172062	SRR33418166	PV690508	Cisticola_juncidis	Choma, Zambia	this study	white
Anomalospiza imberbis	2014JUN7A3	M	72574038	151	18.2645	PRJNA1258568	SAMN26172047	SRR33418165	PV690506	Cisticola_juncidis	Choma, Zambia	this study	white
Anomalospiza imberbis	2014PS008A1	M	77066373	151	19.395	PRJNA1258568	SAMN26172065	SRR33418156	PV690509	Prinia_subflava	Choma, Zambia	this study	red
Anomalospiza imberbis	2014PS058A1	F	75735767	151	19.0602	PRJNA1258568	SAMN26172073	SRR33418155	PV690510	Prinia_subflava	Choma, Zambia	this study	blue
Anomalospiza imberbis	CF0715B	M	83812781	151	21.0929	PRJNA1258568	SAMN26171966	SRR33418154	PV690491	Prinia_subflava	Choma, Zambia	this study	blue
Anomalospiza imberbis	CF0720A	M	55545124	150	13.8863	PRJNA1258568	SAMN26171969	SRR33418164	PV690492	Cisticola_erythrops	Choma, Zambia	this study	bright
Anomalospiza imberbis	CF0724A	F	64409617	151	16.2098	PRJNA1258568	SAMN26171971	SRR33418163	PV690493	Cisticola_erythrops	Choma, Zambia	this study	dull
Anomalospiza imberbis	CF0802B	F	64068400	150	16.0171	PRJNA1258568	SAMN26171973	SRR33418162	PV690494	Cisticola_erythrops	Choma, Zambia	this study	dull
Vidua camerunensis	CNB020	F	133912533	151	33.7013	PRJNA1258961	SAMN48337439	SRR33430739	PV690456	Lagonosticta spp.	Tibati, Cameroon	this study
Vidua camerunensis	CNB104	F	97347783	151	24.4992	PRJNA1258961	SAMN48337440	SRR33430738	PV690457	Lagonosticta spp.	Tibati, Cameroon	this study
Vidua camerunensis	CNB106	F	98205667	151	24.7151	PRJNA1258961	SAMN48337441	SRR33430729	PV690458	Lagonosticta spp.	Tibati, Cameroon	this study
Vidua camerunensis	CNB107	F	140196356	151	35.2827	PRJNA1258961	SAMN48337442	SRR33430728	PV690459	Lagonosticta spp.	Tibati, Cameroon	this study
Vidua camerunensis	CNB167	F	82761436	151	20.8283	PRJNA1258961	SAMN48337443	SRR33430727	PV690460	Lagonosticta spp.	Tibati, Cameroon	this study
Vidua camerunensis	CNB183	F	140441513	151	35.3444	PRJNA1258961	SAMN48337444	SRR33430726	PV690461	Lagonosticta spp.	Tibati, Cameroon	this study
Vidua camerunensis	CNB184	F	114400711	151	28.7908	PRJNA1258961	SAMN48337445	SRR33430725	PV690462	Lagonosticta spp.	Tibati, Cameroon	this study
Vidua camerunensis	CNB188	F	87463718	151	22.0117	PRJNA1258961	SAMN48337446	SRR33430724	PV690463	Lagonosticta spp.	Tibati, Cameroon	this study
Vidua camerunensis	CNB217	F	143363862	151	36.0799	PRJNA1258961	SAMN48337447	SRR33430723	PV690464	Lagonosticta spp.	Tibati, Cameroon	this study
Vidua camerunensis	CNB298	F	140321234	151	35.3142	PRJNA1258961	SAMN48337448	SRR33430722	PV690465	Lagonosticta spp.	Tibati, Cameroon	this study
Vidua camerunensis	CNB303	F	197473212	151	49.6974	PRJNA1258961	SAMN48337449	SRR33430737	PV690466	Lagonosticta spp.	Tibati, Cameroon	this study
Vidua camerunensis	CNB373	F	201810818	151	50.7891	PRJNA1258961	SAMN48337450	SRR33430736	PV690467	Lagonosticta spp.	Tibati, Cameroon	this study
Vidua camerunensis	CNB395	F	163764568	151	41.2141	PRJNA1258961	SAMN48337451	SRR33430735	PV690468	Lagonosticta spp.	Tibati, Cameroon	this study
Vidua camerunensis	CNB408	F	160559684	151	40.4075	PRJNA1258961	SAMN48337452	SRR33430734	PV690469	Lagonosticta spp.	Tibati, Cameroon	this study
Vidua camerunensis	CNB474	F	110776969	151	27.8789	PRJNA1258961	SAMN48337453	SRR33430733	PV690470	Lagonosticta spp.	Tibati, Cameroon	this study
Vidua camerunensis	MDS001	M	147277869	151	37.0649	PRJNA1258961	SAMN48337454	SRR33430732	PV690471	Lagonosticta spp.	Tibati, Cameroon	this study
Vidua camerunensis	MDS006	M	105247096	151	26.4872	PRJNA1258961	SAMN02687730	SRR33449325	PV690472	Lagonosticta spp.	Tibati, Cameroon	this study
Vidua camerunensis	MDS008	M	181796526	151	45.7521	PRJNA1258961	SAMN48337455	SRR33430731	PV690473	Lagonosticta spp.	Tibati, Cameroon	this study
Vidua camerunensis	MDS009	M	135214625	151	34.029	PRJNA1258961	SAMN48337456	SRR33430730	PV690474	Lagonosticta spp.	Tibati, Cameroon	this study
Vidua macroura	VmacP02	F	62219662	150	15.5549	PRJNA1261583	SAMN48428836	SRR33516006	PV690475	Estrilda astrild	KwaZulu_Natal, S. Africa	this study	collected by Justin Schuetz
Vidua macroura	VmacP15	F	64975565	150	16.2439	PRJNA1261583	SAMN48428837	SRR33516005	PV690476	Estrilda astrild	KwaZulu_Natal, S. Africa	this study	collected by Justin Schuetz
Vidua macroura	VmacP17	M	62972782	150	15.7432	PRJNA1261583	SAMN48428838	SRR33515998	PV690477	Estrilda astrild	KwaZulu_Natal, S. Africa	this study	collected by Justin Schuetz
Vidua macroura	VmacP26	F	59313595	150	14.8284	PRJNA1261583	SAMN48428839	SRR33515997	PV690478	Estrilda astrild	KwaZulu_Natal, S. Africa	this study	collected by Justin Schuetz
Vidua macroura	VmacP27	F	62484933	150	15.6212	PRJNA1261583	SAMN48428840	SRR33515996	PV690479	Estrilda astrild	KwaZulu_Natal, S. Africa	this study	collected by Justin Schuetz
Vidua macroura	VmacP28	F	69629115	150	17.4073	PRJNA1261583	SAMN48428841	SRR33515995	PV690480	Estrilda astrild	KwaZulu_Natal, S. Africa	this study	collected by Justin Schuetz
Vidua macroura	VmacP34	M	73841005	150	18.4603	PRJNA1261583	SAMN48428842	SRR33515994	PV690481	Estrilda astrild	KwaZulu_Natal, S. Africa	this study	collected by Justin Schuetz
Vidua macroura	VmacP37	F	61250597	150	15.3126	PRJNA1261583	SAMN48428843	SRR33515993	PV690482	Estrilda astrild	KwaZulu_Natal, S. Africa	this study	collected by Justin Schuetz
Vidua macroura	VmacP41	M	70294141	150	17.5735	PRJNA1261583	SAMN48428844	SRR33515992	PV690483	Estrilda astrild	KwaZulu_Natal, S. Africa	this study	collected by Justin Schuetz
Vidua macroura	VmacP44	F	67351418	150	16.8379	PRJNA1261583	SAMN48428845	SRR33515991	PV690484	Estrilda astrild	KwaZulu_Natal, S. Africa	this study	collected by Justin Schuetz
Vidua macroura	VmacP52	F	65013457	150	16.2534	PRJNA1261583	SAMN48428846	SRR33516004	PV690485	Estrilda astrild	KwaZulu_Natal, S. Africa	this study	collected by Justin Schuetz
Vidua macroura	VmacP63	M	65670608	150	16.4177	PRJNA1261583	SAMN48428847	SRR33516003	PV690486	Estrilda astrild	KwaZulu_Natal, S. Africa	this study	collected by Justin Schuetz
Vidua macroura	VmacP73	F	67332147	150	16.833	PRJNA1261583	SAMN48428848	SRR33516002	PV690487	Estrilda astrild	KwaZulu_Natal, S. Africa	this study	collected by Justin Schuetz
Vidua macroura	VmacP76	M	59585210	150	14.8963	PRJNA1261583	SAMN48428849	SRR33516001	PV690488	Estrilda astrild	KwaZulu_Natal, S. Africa	this study	collected by Justin Schuetz
Vidua macroura	VmacP77	F	63054342	150	15.7636	PRJNA1261583	SAMN48428850	SRR33516000	PV690489	Estrilda astrild	KwaZulu_Natal, S. Africa	this study	collected by Justin Schuetz
Vidua macroura	VmacP80	F	63766019	150	15.9415	PRJNA1261583	SAMN48428851	SRR33515999	PV690490	Estrilda astrild	KwaZulu_Natal, S. Africa	this study	collected by Justin Schuetz
Taeniopygia castanotis	Tg_26462	F	142812145	100	23.802	PRJEB10586	SAMEA3532857	ERR1013161	NA	NA	Fowler's Gap, Australia	Singhal et al. 2015
Taeniopygia castanotis	Tg_26516	M	161603450	100	26.9339	PRJEB10586	SAMEA3532863	ERR1013167	NA	NA	Fowler's Gap, Australia	Singhal et al. 2015
Taeniopygia castanotis	Tg_26721	F	140044770	100	23.3408	PRJEB10586	SAMEA3532860	ERR1013164	NA	NA	Fowler's Gap, Australia	Singhal et al. 2015
Taeniopygia castanotis	Tg_26733	M	145143253	100	24.1905	PRJEB10586	SAMEA3532866	ERR1013170	NA	NA	Fowler's Gap, Australia	Singhal et al. 2015
Taeniopygia castanotis	Tg_26781	M	162647627	100	27.1079	PRJEB10586	SAMEA3532869	ERR1013173	NA	NA	Fowler's Gap, Australia	Singhal et al. 2015
Taeniopygia castanotis	Tg_26792	M	175665692	100	29.2776	PRJEB10586	SAMEA3532871	ERR1013175	NA	NA	Fowler's Gap, Australia	Singhal et al. 2015
Taeniopygia castanotis	Tg_26795	F	143003808	100	23.834	PRJEB10586	SAMEA3532873	ERR1013177	NA	NA	Fowler's Gap, Australia	Singhal et al. 2015
Taeniopygia castanotis	Tg_26820	F	127931656	100	21.3219	PRJEB10586	SAMEA3532865	ERR1013169	NA	NA	Fowler's Gap, Australia	Singhal et al. 2015
Taeniopygia castanotis	Tg_26881	F	115818588	100	19.3031	PRJEB10586	SAMEA3532868	ERR1013172	NA	NA	Fowler's Gap, Australia	Singhal et al. 2015
Taeniopygia castanotis	Tg_26896	F	128620755	100	21.4368	PRJEB10586	SAMEA3532870	ERR1013174	NA	NA	Fowler's Gap, Australia	Singhal et al. 2015
Taeniopygia castanotis	Tg_28016	F	136138576	100	22.6898	PRJEB10586	SAMEA3532872	ERR1013176	NA	NA	Fowler's Gap, Australia	Singhal et al. 2015
Taeniopygia castanotis	Tg_28078	F	148030800	100	24.6718	PRJEB10586	SAMEA3532874	ERR1013178	NA	NA	Fowler's Gap, Australia	Singhal et al. 2015
Taeniopygia castanotis	Tg_28313	M	168667474	100	28.1112	PRJEB10586	SAMEA3532875	ERR1013179	NA	NA	Fowler's Gap, Australia	Singhal et al. 2015
Taeniopygia castanotis	Tg_28339	F	160994092	100	26.8323	PRJEB10586	SAMEA3532858	ERR1013162	NA	NA	Fowler's Gap, Australia	Singhal et al. 2015
Taeniopygia castanotis	Tg_28353	M	144955321	100	24.1592	PRJEB10586	SAMEA3532859	ERR1013163	NA	NA	Fowler's Gap, Australia	Singhal et al. 2015
Taeniopygia castanotis	Tg_28402	M	126359816	100	21.06	PRJEB10586	SAMEA3532862	ERR1013166	NA	NA	Fowler's Gap, Australia	Singhal et al. 2015
Taeniopygia castanotis	Tg_28404	M	126503589	100	21.0839	PRJEB10586	SAMEA3532864	ERR1013168	NA	NA	Fowler's Gap, Australia	Singhal et al. 2015
Taeniopygia castanotis	Tg_28456	F	156700760	100	26.1168	PRJEB10586	SAMEA3532861	ERR1013165	NA	NA	Fowler's Gap, Australia	Singhal et al. 2015
Taeniopygia castanotis	Tg_28481	M	120850692	100	20.1418	PRJEB10586	SAMEA3532867	ERR1013171	NA	NA	Fowler's Gap, Australia	Singhal et al. 2015
Lonchura striata	L_UB	F	291552828	150	72.8882	PRJNA779480	SAMN23039802	SRR16914209	NA	NA	Nantou Co., Taiwan	Lu et al. 2021
Lonchura striata	LST037	M	126391981	151	31.8086	PRJNA779480	SAMN23039803	SRR16914208	NA	NA	Yunlin Co., Taiwan	Lu et al. 2021
Lonchura striata	LST038	M	93748128	151	23.5933	PRJNA779480	SAMN23039804	SRR16914207	NA	NA	Yunlin Co., Taiwan	Lu et al. 2021
Lonchura striata	LST040	M	119749651	151	30.137	PRJNA779480	SAMN23039805	SRR16914206	NA	NA	Yunlin Co., Taiwan	Lu et al. 2021
Serinus canaria	SRR2895902	M/F*	178572210	101	30.0597	PRJNA300534	SAMN04225733	SRR2895902	NA	NA	La Palma Island, Spain	Lopes et al. 2016	*pooled sample of 39 individuals
Serinus canaria	SRR10959378	M	63732844	111	11.7906	PRJNA602931	SAMN13911129	SRR10959378	NA	NA	captive ("Belgian waterslager")	Madison et al. 2025
Serinus canaria	SRR10959379	F	80002760	111	14.8005	PRJNA602931	SAMN13911128	SRR10959379	NA	NA	captive ("Belgian waterslager")	Madison et al. 2025
Serinus canaria	SRR10959380	F	74813286	111	13.8405	PRJNA602931	SAMN13911127	SRR10959380	NA	NA	captive ("Belgian waterslager")	Madison et al. 2025
Serinus canaria	SRR10959386	M	71352146	111	13.2001	PRJNA602931	SAMN13911126	SRR10959386	NA	NA	captive ("Belgian waterslager")	Madison et al. 2025
Serinus canaria	SRR10959387	M	67966117	111	12.5737	PRJNA602931	SAMN13911125	SRR10959387	NA	NA	captive ("Belgian waterslager")	Madison et al. 2025
Agelaius phoeniceus	Apho_647076	F	101765274	151	25.6109	PRJNA1262330	SAMN48451613	SRR33541152	PV690446	NA	McHenry Co., North Dakota	this study	voucher: USNM 647076
Agelaius phoeniceus	Apho_647077	F	102356258	151	25.7597	PRJNA1262330	SAMN48451614	SRR33541151	PV690447	NA	McHenry Co., North Dakota	this study	voucher: USNM 647077
Agelaius phoeniceus	Apho_647108	F	88295498	151	22.221	PRJNA1262330	SAMN48451615	SRR33541150	PV690448	NA	Bottineau Co., North Dakota	this study	voucher: USNM 647108
Agelaius phoeniceus	Apho_647109	F	69280995	151	17.4357	PRJNA1262330	SAMN48451616	SRR33541149	PV690449	NA	Bottineau Co., North Dakota	this study	voucher: USNM 647109
Agelaius phoeniceus	Apho_647110	M	77413579	151	19.4824	PRJNA1262330	SAMN48451617	SRR33541148	PV690450	NA	Bottineau Co., North Dakota	this study	voucher: USNM 647110
Agelaius phoeniceus	Apho_647619	F	37487521	151	9.43436	PRJNA1262330	SAMN48451618	SRR33541147	PV690451	NA	Bottineau Co., North Dakota	this study	voucher: USNM 647619
Agelaius phoeniceus	Apho_652559	F	101498789	151	25.5439	PRJNA1262330	SAMN48451619	SRR33541146	PV690452	NA	Valley Co., Montana	this study	voucher: USNM 652559
Agelaius phoeniceus	Apho_652568	M	136733052	151	34.4112	PRJNA1262330	SAMN48451620	SRR33541145	PV690453	NA	Valley Co., Montana	this study	voucher: USNM 652568
Agelaius phoeniceus	Apho_652592	F	116181701	151	29.2391	PRJNA1262330	SAMN48451621	SRR33541144	PV690454	NA	Valley Co., Montana	this study	voucher: USNM 652592
Agelaius phoeniceus	Apho_652593	F	107299129	151	27.0036	PRJNA1262330	SAMN48451622	SRR33541143	PV690455	NA	Valley Co., Montana	this study	voucher: USNM 652593
Molothrus ater	Mate_601445	F	84811296	151	21.3442	PRJNA1261928	SAMN48441454	SRR33531140	PV690436	unknown	Bath Co.,Virginia	this study	voucher: USNM 601445
Molothrus ater	Mate_601470	M	76578545	151	19.2723	PRJNA1261928	SAMN48441462	SRR33531139	PV690437	unknown	Augusta Co.,Virginia	this study	voucher: USNM 601470
Molothrus ater	Mate_602207	F	80753396	151	20.3229	PRJNA1261928	SAMN48441455	SRR33531138	PV690438	unknown	Prince George's Co.,Maryland	this study	voucher: USNM 602207
Molothrus ater	Mate_602240	F	87845695	151	22.1078	PRJNA1261928	SAMN48441456	SRR33531137	PV690439	unknown	Charles Co.,Maryland	this study	voucher: USNM 602240
Molothrus ater	Mate_602241	F	80905229	151	20.3611	PRJNA1261928	SAMN48441457	SRR33531136	PV690440	unknown	Charles Co.,Maryland	this study	voucher: USNM 602241
Molothrus ater	Mate_609468	F	83125101	151	20.9198	PRJNA1261928	SAMN48441458	SRR33531135	PV690441	unknown	Calvert Co.,Maryland	this study	voucher: USNM 609468
Molothrus ater	Mate_609755	F	75450956	151	18.9885	PRJNA1261928	SAMN48441459	SRR33531134	PV690442	unknown	Calvert Co.,Maryland	this study	voucher: USNM 609755
Molothrus ater	Mate_609756	M	118195743	151	29.7459	PRJNA1261928	SAMN48441460	SRR33531133	PV690443	unknown	Calvert Co.,Maryland	this study	voucher: USNM 609756
Molothrus ater	Mate_627827	M	68997301	151	17.3643	PRJNA1261928	SAMN48441461	SRR33531132	PV690444	unknown	Prince George's Co.,Maryland	this study	voucher: USNM 627827
Molothrus ater	Mate_650005	F	79624161	151	20.0387	PRJNA1261928	SAMN48441463	SRR33531131	PV690445	unknown	Prince George's Co.,Maryland	this study	voucher: USNM 650005

## Sheet: Suppl. Table 5 PAML results
Supplementary Table 5. PAML results for all individual genes analyzed along with results for combined sets of genes. For each gene or combined set of genes (top line in each section), dN and dN/dS estimates are from the “VA” model (see fig. S9), which assumes different dN/dS rates for the outgroup, Vidua and Anomalospiza, respectively. The best model for differences in dN/dS and its ∆AICc value r…
A) 29 W-linked genes with a putatively functional copy in all eight focal species.
					dN		dN/dS					model weights
gene	cds	exons*	gaps	N	Vidua	Aimb	outgroup	Vidua	Aimb	best	∆AICc	null	A	P	V	VA	VAp	Notes (with taxon abbreviations as in Table S2)
29 W-linked	18273	354	39	18234	0.002345	0.00441512	0.1872	0.2136	0.3107	A↑	18.2972	5.64494e-05	0.530704	0.0275019	2.15127e-05	0.319439	0.122277
ARK2N_W	405	4	2	403	0.004023	0.0102706	0.3758	0.5655	0.9787	null		0.27063	0.268062	0.130504	0.0956113	0.0957197	0.139473
ARRDC3_W	414	8	0	414	0.0017725	0.00247888	0.375	0.1504	0.2837	null		0.382217	0.125746	0.129199	0.210564	0.0714792	0.080795
ATP5F1A_W	553	12	0	553	0.0007305	0.00604025	0.0886	0.046	0.6603	A↑	8.08411	0.0110459	0.62899	0.0115435	0.00722049	0.25324	0.0879604
CHD1_W	1787	36	5	1782	0.002443	0.004947	0.2582	0.2711	0.3737	null		0.36834	0.224944	0.164418	0.13181	0.0808227	0.0296652
CKMT2_W	419	9	0	419	0.001151	0.00300225	0.0903	0.3395	0.1844	null		0.320902	0.139407	0.296634	0.141879	0.0656882	0.03549
DCAF12_W	453	9	0	453	0.0029365	0.00612025	0.2038	0.4183	0.4139	P↑	2.58106	0.12316	0.0636811	0.447651	0.0497686	0.0288037	0.286936
GNAQ_W	359	7	0	359	0.001036	0.00322213	0.0595	0.3826	0.1672	null		0.296492	0.164632	0.235311	0.162191	0.104546	0.0368277
GOLPH3_W	294	4	2	292	0.002772	0.00904725	0.0767	0.1335	0.4131	A↑	3.28017	0.089114	0.459438	0.204165	0.0269958	0.162852	0.0574356
HINT1_W	72	2	0	72	0.0115485	0.0069015	1.276	0.9428	0.9364	null		0.739777	0.0710127	0.110284	0.0709234	0.00616457	0.00183821	annotations differ for Z and W; Tgut W reference: ACH45037.1
HNRNPK_W	428	14	0	428	1e-06	0.001064	0.0001	0.0001	0.0699	A↑	1.09436	0.207152	0.358036	0.208218	0.0744894	0.115229	0.0368755
KCMF1_W	377	7	0	377	0.002047	0.00638575	0.0806	0.1797	0.8032	A↑	4.15432	0.0599012	0.478116	0.158083	0.0193903	0.202102	0.0824072
MIER3_W	555	13	2	553	0.0051515	0.00412225	0.196	1.0228	0.3069	P↑	2.04237	0.113232	0.0403397	0.314388	0.298807	0.121726	0.111506
NIPBL_W	2771	46	1	2770	0.0009265	0.00230825	0.1577	0.0709	0.199	V↓	2.05358	0.153932	0.0864263	0.0615668	0.429791	0.19177	0.0765146
RASA1_W	1021	25	4	1017	0.003542	0.00699913	0.1768	0.2467	0.3531	A↑	0.660725	0.221451	0.308143	0.174828	0.0820505	0.139637	0.0738899	1st coding exon missing in Aimb_CE but complete in other lineages
RFX3_W	747	16	2	745	0.004065	0.003537	0.3161	0.5543	0.2793	null		0.390682	0.145151	0.136544	0.209298	0.0730162	0.0453098
RPL37_W	97	4	0	97	0.002542	0.0286375	0.791	999	999	P↑	2.59742	0.140721	0.242281	0.515683	0.0311066	0.0586906	0.0115179
SMAD2_W	467	10	0	467	0.000979	2e-06	0.0258	0.2807	0.0001	V↑	0.162496	0.266603	0.158194	0.0945491	0.289168	0.144613	0.0468723
SMAD4_W	511	10	0	511	2e-06	0.00129725	0.0001	0.0001	0.0861	A↑	3.29746	0.0980562	0.509929	0.115157	0.0537347	0.168017	0.0551061	analyzed shorter transcript, excuding exon with stop codon in Anomalospiza
SPIN1_W	262	5	0	262	1e-06	1e-06	0.0353	0.0001	0.0001	null		0.431307	0.152045	0.189731	0.155683	0.0552904	0.0159439
SREK1_W	669	12	6	663	0.007049	0.00739225	0.4364	0.4459	0.3837	null		0.452661	0.160969	0.158118	0.154495	0.0545335	0.0192235
SUB1_W	126	4	0	126	0.0051995	0.00580275	0.1463	999	0.593	null		0.316493	0.0756329	0.236416	0.267614	0.0867365	0.0171074
TNPO1_W	894	23	5	889	0.000521	0.001379	0.0458	0.0573	0.1157	null		0.359056	0.235111	0.157717	0.124594	0.0828371	0.040685
UBAP1_W	522	7	2	520	0.005845	0.0100872	0.478	0.9967	1.1771	P↑	0.797185	0.22036	0.193616	0.328276	0.10702	0.110756	0.0399719
UBE2R2_W	238	5	0	238	1.5e-06	0.001952	0.0001	0.0001	0.0977	A↑	1.0454	0.217258	0.366422	0.212543	0.0708683	0.103836	0.0290727
VCP_W	806	17	0	806	2.5e-06	0.000509	0.0109	0.0001	0.0251	null		0.372929	0.172407	0.128576	0.20721	0.0868628	0.0320156
ZFAND5_W	211	5	0	211	0.0037965	0.015015	0.7679	0.1971	0.8725	null		0.372507	0.11986	0.115849	0.282595	0.0777954	0.0313937
ZFR_W	1069	20	2	1067	0.0022055	0.00411425	0.2426	0.2071	0.3112	null		0.411012	0.171388	0.14418	0.154466	0.0624459	0.0565077
ZNF131_W	581	6	1	580	0.004224	0.00391575	0.2265	1.0772	0.1608	V↑	2.09756	0.160259	0.0742359	0.0655367	0.457406	0.181991	0.0605707	premature stop codon in Anomalospiza truncates 35 AAs from protein
ZSWIM6_W	1166	14	5	1161	0.002898	0.00634213	0.1978	0.2161	0.3828	A↑	1.0203	0.189214	0.315143	0.255147	0.0669424	0.112891	0.0606634
B) 29 Z-linked gametologs of the above set of W-linked genes.
					dN		dN/dS					model weights
gene	cds	exons*	gaps	N	Vidua	Aimb	outgroup	Vidua	Aimb	best	∆AICc	null	A	P	V	VA	VAp
29 Z-linked	18358	355	62	18296	0.0014115	0.003465	0.0597	0.0663	0.1322	A↑	42.2505	4.00296e-10	0.598344	1.306e-05	1.51311e-10	0.28858	0.113062
ARK2N	405	4	1	404	0.0073745	0.059687	0.2097	0.2568	0.9122	A↑	18.2631	6.55867e-05	0.606186	0.0132892	3.10192e-05	0.219811	0.160617
ARRDC3	414	8	0	414	2.5e-06	2e-06	0.0341	0.0001	0.0001	P↓	0.395649	0.261197	0.142027	0.318334	0.15167	0.0912076	0.0355649
ATP5F1A	553	12	0	553	0.0005995	0.000856	0.0249	0.0246	0.0249	null		0.450102	0.15524	0.16058	0.155253	0.053334	0.0254912
CHD1	1787	36	13	1774	0.001169	0.002447	0.0528	0.0501	0.1009	P↑	1.43247	0.149453	0.184597	0.305888	0.0568996	0.0669349	0.236228
CKMT2	420	9	1	419	3.5e-06	0.001936	0.017	0.0001	0.0415	A↑V↓	4.8228	0.0613186	0.0370054	0.128303	0.0586821	0.0310151	0.683675
DCAF12	456	9	0	456	0.000614	0.001052	0.0719	0.0833	0.0517	null		0.417536	0.149357	0.191638	0.143653	0.0509338	0.0468823
GNAQ	359	7	0	359	1.5e-06	3e-06	0.0114	0.0001	0.0001	null		0.401908	0.160026	0.196624	0.156167	0.0639952	0.0212788
GOLPH3	295	4	0	295	2e-06	0.006347	0.0001	0.0001	0.2615	A↑	12.5247	0.00125411	0.657716	0.0613986	0.000640501	0.211523	0.0674676
HINT1	126	3	0	126	0.0026755	0.003575	0.101	0.3308	0.1651	null		0.484106	0.131125	0.163813	0.164818	0.0449317	0.0112067
HNRNPK	428	14	0	428	1.5e-06	0.002149	0.0001	0.0001	0.0898	A↑	5.61805	0.0325228	0.539674	0.171795	0.0138337	0.181476	0.0606994
KCMF1	381	7	0	381	0.0009475	0.001183	0.0237	0.0521	0.0592	null		0.425488	0.165342	0.160908	0.15676	0.065001	0.0265003
MIER3	551	13	1	550	0.0021255	0.002445	0.0846	0.0799	0.113	null		0.44367	0.165939	0.153142	0.154671	0.0571657	0.0254124
NIPBL	2780	46	4	2776	0.00155	0.001207	0.0679	0.0918	0.0682	null		0.359364	0.131361	0.131576	0.183264	0.0665454	0.12789
RASA1	997	25	4	993	0.001934	0.001694	0.0739	0.0758	0.0614	null		0.440673	0.164368	0.159019	0.156935	0.0583186	0.020686
RFX3	749	16	0	749	0.001236	0.001254	0.0706	0.1569	0.0692	null		0.384325	0.139546	0.147956	0.218696	0.0765581	0.0329191
RPL37	97	4	0	97	5.5e-06	1e-06	0.0001	0.0001	0.0001	null		0.571851	0.131035	0.131035	0.131035	0.0289122	0.00613308
SMAD2	466	10	0	466	1.5e-06	2e-06	0.0069	0.0001	0.0001	null		0.42278	0.162808	0.180089	0.15411	0.0596303	0.020583
SMAD4	517	10	16	501	0.0048035	9e-06	0.0225	0.0807	0.0001	V↑A↓	5.30588	0.0335507	0.10293	0.0160189	0.16111	0.476275	0.210116
SPIN1	262	5	0	262	1.5e-06	2e-06	0.0001	0.0001	0.0001	null		0.478997	0.152597	0.152597	0.152597	0.0481582	0.0150541
SREK1	675	12	8	667	0.000495	0.005795	0.0537	0.0169	0.1591	A↑	3.31935	0.0728394	0.38296	0.0381313	0.092666	0.293256	0.120147
SUB1	126	4	0	126	1e-06	0.003478	0.0759	0.0001	0.2972	null		0.456328	0.181791	0.134351	0.154922	0.0581136	0.0144951
TNPO1	890	23	0	890	2.5e-06	0.000519	0.0049	0.0001	0.0345	null		0.292106	0.271178	0.125749	0.15067	0.118217	0.0420798
UBAP1	519	7	1	518	0.0035885	0.009336	0.2363	0.2507	0.4929	P↑	0.162512	0.231552	0.21422	0.251152	0.0798019	0.0735709	0.149702
UBE2R2	238	5	0	238	1e-06	2e-06	0.0001	0.0001	0.0001	null		0.483708	0.151614	0.151614	0.151614	0.0470216	0.0144274
VCP	806	17	0	806	3.5e-06	0.001173	0.0001	0.0001	0.0283	A↑	5.34718	0.038671	0.560417	0.115976	0.0191247	0.19685	0.0689613
ZFAND5	211	5	1	210	0.0056695	0.002131	0.0961	0.6483	0.1634	V↑	1.53952	0.193048	0.0592838	0.125601	0.416839	0.13612	0.0691073
ZFR	1072	20	4	1068	0.0010455	0.004115	0.0325	0.0442	0.1217	A↑	4.58485	0.0516207	0.510988	0.100328	0.0184663	0.2002	0.118397
ZNF131	617	6	7	610	0.0038455	0.009497	0.0824	0.1003	0.3324	A↑	6.00846	0.020055	0.404523	0.17206	0.00754454	0.148974	0.246844
ZSWIM6	1161	14	1	1160	0.0018205	0.002224	0.0483	0.103	0.103	P↑	0.00482258	0.241781	0.154667	0.242365	0.160661	0.128344	0.072182
C) 48 Z-linked genes with missing or non-functional W-linked gametologs in one or more of the eight focal species.
					dN		dN/dS					model weights
gene	cds	exons*	gaps	N	Vidua	Aimb	outgroup	Vidua	Aimb	best	∆AICc	null	A	P	V	VA	VAp
48 Z-linked	32484	497	365	32119	0.0044095	0.005945	0.1531	0.1897	0.2592	V↑A↑↑	52.5969	2.09223e-12	0.0162024	4.59374e-05	6.05128e-12	0.551922	0.431829
APBA1	824	12	0	824	0.0048365	0.002962	0.0795	0.1108	0.228	A↑	0.0877624	0.262453	0.274226	0.157124	0.100631	0.126087	0.0794791
ATOSB	620	7	10	610	0.01096	0.00811	0.165	0.2876	0.2167	P↑	0.359686	0.251473	0.0941646	0.30102	0.213941	0.0886134	0.0507889
BTF3	162	5	0	162	2e-06	0.003	0.0163	0.0001	0.1762	null		0.334566	0.290055	0.137947	0.118584	0.0922981	0.0265494
CDC37L1	324	7	1	323	0.0115495	0.001371	0.2429	0.3867	0.0509	A↓	0.875994	0.217689	0.337331	0.0718991	0.13468	0.159251	0.0791489
CERT1	624	17	0	624	0.0006135	0.001473	0.0334	0.0331	0.0407	null		0.449428	0.160593	0.157235	0.156352	0.0556213	0.0207716
CTIF	597	11	2	595	0.001293	0.001429	0.0732	0.0543	0.0414	null		0.40293	0.178232	0.189779	0.145122	0.0658757	0.0180605
CZH18orf32	100	2	3	97	0.024188	3e-06	0.229	1.3733	0.0001	V↑	0.287817	0.300805	0.0958476	0.0810836	0.347363	0.139362	0.0355381
FAM219A	185	6	0	185	4e-06	1e-06	0.0181	0.0001	0.0001	null		0.434149	0.13859	0.186877	0.16985	0.0547372	0.015796
FCHO2	980	27	0	980	0.004627	0.004182	0.0889	0.2098	0.2369	P↑	6.89226	0.022912	0.02654	0.71895	0.0242573	0.0523278	0.155013
FEM1C	617	2	0	617	0.00187	0.001475	0.019	0.0645	0.0604	null		0.247328	0.132066	0.226812	0.193052	0.136318	0.0644231
FOXD1	429	1	12	417	0.00536	0.00688	0.0784	0.1028	0.0951	null		0.438455	0.151474	0.173288	0.160203	0.0570336	0.0195448
GPBP1	471	10	2	469	0.017523	0.01122	0.3117	0.6045	0.632	P↑	0.953071	0.193146	0.11493	0.311058	0.186198	0.14464	0.0500286
HMGCS1	522	9	0	522	0.004611	0.000905	0.0381	0.1384	0.0373	V↑	2.36	0.136342	0.0497967	0.155281	0.443708	0.151804	0.0630686
HOMER1	355	9	0	355	1.5e-06	2e-06	0.0176	0.0001	0.0001	null		0.404453	0.161281	0.193696	0.155821	0.0638436	0.0209047
IFNW1	184	1	0	184	0.0080385	0.006444	0.4472	0.2925	0.3704	null		0.399104	0.120148	0.233746	0.140262	0.0418499	0.0648903
KCNN2	844	9	41	803	0.002213	1e-06	0.0937	0.0991	0.0001	A↓	0.660882	0.252672	0.351614	0.104942	0.0936288	0.124089	0.0730549
KIF24	1425	12	209	1216	0.018032	0.017541	0.6945	0.5648	0.741	null		0.381391	0.145166	0.146895	0.216218	0.0795992	0.0307303
KIF2A	744	21	0	744	3e-06	0.004833	0.1787	0.0001	0.1577	V↓	13.6322	0.000721224	0.000259118	0.00332347	0.658049	0.238153	0.0994945
MACIR	207	1	0	207	0.004468	0.018151	0.5355	0.3203	0.8329			0.4422	0.169414	0.134936	0.156337	0.0576434	0.0394702	Lstr has disabling frameshift; analyzed sequence excluding one codon
MAP1B	2481	7	1	2480	0.006748	0.007012	0.131	0.3085	0.2465	P↑	14.8253	0.000356934	0.000915393	0.591364	0.0266567	0.261161	0.119546
MAPK4	580	5	7	573	0.003078	0.00067	0.0296	0.0514	0.014	null		0.318455	0.153397	0.117458	0.17884	0.082338	0.149512
ME2	578	15	0	578	0.003137	0.001523	0.0448	0.0531	0.0241	null		0.383002	0.194801	0.173983	0.141593	0.0706113	0.0360101
MRPS36	107	4	0	107	5e-07	0	0.3359	0.0001	0.0001	null		0.467506	0.11346	0.113464	0.228053	0.0535941	0.0239227
NFIL3	457	1	0	457	0.0007225	0.002004	0.0446	0.0434	0.0696	null		0.425135	0.163288	0.185136	0.145325	0.0552592	0.0258565
NTRK2	842	18	0	842	0.0018155	0.001712	0.0113	0.0816	0.0736	P↑	4.54613	0.0416683	0.0448931	0.404562	0.0975216	0.292102	0.119253
PAIP1	467	11	5	462	0.0096525	0.018511	0.1458	0.6046	0.4908	P↑	11.6415	0.00207049	0.0141158	0.698227	0.00926719	0.186305	0.0900141
PCGF3	242	8	0	242	3.5e-06	1e-06	0.0001	0.0001	0.0001	null		0.482851	0.151794	0.151794	0.151794	0.0472269	0.0145397
PGGT1B	379	9	6	373	0.003974	1e-06	0.1153	0.1338	0.0001	null		0.358085	0.258612	0.126548	0.12751	0.0878372	0.0414067	Vmac truncated by two codons at 5' end due to point mutation in start codon
PIAS2	625	14	4	621	0.002507	0.006935	0.0216	0.1379	0.1851	P↑	10.7527	0.00254809	0.0567962	0.550968	0.00213328	0.283341	0.104214
PRKAA1	561	9	0	561	1.5e-06	0.002476	0.0182	0.0001	0.1301	A↑	2.77369	0.115039	0.460408	0.0727774	0.074773	0.270795	0.00620848
PTCH1	1447	23	4	1443	0.0018985	0.002726	0.0996	0.1129	0.2003	A↑	0.024243	0.275307	0.278664	0.201999	0.0996195	0.103718	0.0406931
RGS7BP	255	6	0	255	0.002798	1e-06	0.0759	0.2064	0.0001	null		0.350718	0.19524	0.124629	0.197207	0.100841	0.0313656
RICTOR	1713	38	1	1712	0.001564	0.000536	0.0195	0.0572	0.0263	V↑	2.0165	0.14635	0.052836	0.147158	0.401116	0.154703	0.0978374
RNF38	662	12	2	660	0.009579	0.006163	0.2718	0.6386	0.3587	V↑	1.78945	0.149441	0.0531733	0.233891	0.365631	0.146867	0.0509978
RPL17	184	6	0	184	9.5e-06	4e-06	0.0001	0.0001	0.0001	null		0.499429	0.14824	0.14824	0.14824	0.0433575	0.0124926
SCAMP1	339	9	0	339	0.0024085	2e-06	0.0165	0.074	0.0001	null		0.296378	0.129627	0.148665	0.278187	0.108453	0.0386899
SETBP1	1632	6	18	1614	0.002868	0.003671	0.14	0.1448	0.2026	null		0.374719	0.210478	0.155969	0.134934	0.0760224	0.0478793
SLC25A51	280	1	0	280	0.0020205	0.000453	0.0652	0.2057	0.0063	V↑A↓	1.44273	0.201369	0.165437	0.0724746	0.0752973	0.0711581	0.414264
SMAD7	391	4	0	391	1.5e-06	0.001086	0.086	0.0001	0.0869	null		0.313384	0.106174	0.1419	0.303784	0.101228	0.0335312
SMC2	1174	24	1	1173	0.0086905	0.043773	0.618	0.5529	1.4207	A↑	11.1408	0.0022915	0.601613	0.0121965	0.00113788	0.226533	0.156228	3' end trimmed to last conserved codon due to variable length among species
SNX18	599	2	1	598	0.0011005	0.005158	0.0276	0.0397	0.1059	A↑	2.90006	0.107148	0.456798	0.114814	0.0371532	0.172349	0.111738
SNX2	523	16	0	523	0.003574	0.002737	0.0843	0.2349	0.1991	P↑	1.06722	0.200899	0.102096	0.342548	0.194712	0.119156	0.0405888
TMED7	216	3	0	216	0.004034	0.002299	0.0107	0.0954	0.0796	P↑	0.277501	0.231775	0.100532	0.266271	0.210315	0.143284	0.0478235
TMEM161B	475	11	0	475	2e-06	0.001995	0.1272	0.0001	0.0969	V↓	1.42428	0.203847	0.070086	0.0900436	0.415511	0.148662	0.0718505
UBAP2	1116	27	1	1115	0.0036885	0.006876	0.1753	0.1793	0.3996	A↑	2.23301	0.146007	0.445929	0.136828	0.0534506	0.158954	0.058831
UBQLN1	590	11	6	584	0.004261	0.005562	0.3278	0.1759	0.2966	null		0.32385	0.112366	0.194048	0.251334	0.0881247	0.0302774
UHRF2	817	16	0	817	0.0013325	0.00729	0.0857	0.1133	0.4252	A↑	8.7215	0.0073974	0.579333	0.104091	0.00262892	0.219224	0.0873253
ZNF462	2538	12	28	2510	0.0026055	0.003396	0.0378	0.0954	0.1137	V↑A↑↑	11.9742	0.00106503	0.0236118	0.392478	0.00502508	0.424154	0.153666
MEX3C	—	—	—	—	—	—	—	—	—	—		—	—	—	—	—	—	Z-linked gene not analyzed: could not assemble in Aimb, Lstr, or Tgut; extreme GC content
D) 16 genes in the pseudoautosomal region (PAR) shared by the Z and W chromosomes.
					dN		dN/dS					model weights
gene	cds	exons*	gaps	N	Vidua	Aimb	outgroup	Vidua	Aimb	best	∆AICc	null	A	P	V	VA	VAp
16 PAR	11356	185	41	11315	0.0042555	0.005806	0.1617	0.1876	0.259	V↑A↑↑	15.7575	0.000298774	0.117064	0.0011936	0.000161576	0.0923454	0.788937
ALPK2	1795	10	14	1781	0.014242	0.021904	0.7292	0.5464	1.2052	A↑	3.22495	0.06793	0.340683	0.0292009	0.0956843	0.295173	0.171329
ATP8B1	1252	27	2	1250	0.0021515	0.004708	0.128	0.086	0.1558	null		0.356648	0.156328	0.141639	0.219007	0.0900207	0.0363564
CPLX4	160	3	0	160	0.0024415	1e-06	0.0356	0.1082	0.1502	null		0.465682	0.133043	0.170174	0.170176	0.0477615	0.0131635
FECH	411	11	1	410	0.0024015	0.00105	0.0552	0.1041	0.0575	null		0.412285	0.138837	0.167094	0.194702	0.0652366	0.0218464
GRP	148	3	1	147	0.002496	1e-06	0.3584	0.1538	0.3208	null		0.480656	0.133669	0.16444	0.164439	0.0448247	0.0119712
LMAN1	501	13	1	500	0.006559	0.00193	0.1253	0.4138	0.1247	V↑	2.38753	0.135243	0.0477252	0.106459	0.446231	0.152123	0.112218
MALT1	819	17	5	814	0.0035435	0.010023	0.3399	0.1199	0.4066	V↓	4.14575	0.0602143	0.0294719	0.0704992	0.478561	0.187871	0.173383
NARS1	559	15	0	559	0.001363	0.003317	0.0346	0.0404	0.1749	A↑	2.48173	0.133925	0.463194	0.138551	0.0467811	0.16205	0.0554989
NEDD4L	1284	28	2	1282	0.002316	0.002916	0.1143	0.145	0.1296	null		0.421052	0.155653	0.153031	0.170976	0.0635363	0.0357512
ONECUT2	483	2	8	475	0.0009975	0.000784	0.0273	0.0271	0.031	null		0.458436	0.157232	0.156496	0.156428	0.0533743	0.0180337
RAX	317	3	1	316	0.0056705	0.002331	0.0691	0.1275	0.0782	null		0.398126	0.132426	0.185155	0.198508	0.0648807	0.0209037
SEC11C	177	6	0	177	0	4e-06	0.032	0.0001	0.0001	null		0.422021	0.182838	0.201584	0.124031	0.0529096	0.0166158
ST8SIA3	380	4	3	377	0.001983	4e-06	0.0242	0.0491	0.0001	null		0.292317	0.228776	0.129777	0.145683	0.101424	0.102023
TXNL1	289	8	0	289	0.001128	0.002794	0.0098	0.0216	0.0344	P↑	0.408865	0.270709	0.187836	0.332114	0.0994298	0.0737338	0.0361769
WDR7	1483	27	2	1481	0.002481	0.002038	0.0455	0.0713	0.0585	null		0.343475	0.141039	0.13928	0.230649	0.0964077	0.0491504
ZNF532	1298	8	1	1297	0.001446	0.001369	0.0973	0.1316	0.0643	null		0.391842	0.187771	0.144636	0.169422	0.0775445	0.0287843
TCF4	—	—	—	—	—	—	—	—	—	—		—	—	—	—	—	—	gene near transition between PAR and rest of Z-chromosome; could not recover or assemble in most species; extreme GC content
E) Control set of 106 Z-linked genes not known to have a W-linked gametolog in any songbird.
					dN		dN/dS					model weights
gene	cds	exons*	gaps	N	Vidua	Aimb	outgroup	Vidua	Aimb	best	∆AICc	null	A	P	V	VA	VAp
Z106	69514	1229	372	69142	0.0068155	0.0065	0.2162	0.2678	0.2493	V↑↑A↑	28.3415	4.48276e-07	2.99584e-06	0.102182	0.0146596	0.639464	0.243691
ABCA1	2262	49	0	2262	0.0030065	0.004053	0.1156	0.1081	0.2268	A↑	2.55905	0.133922	0.481442	0.0854808	0.0557266	0.178635	0.0647938
ADAMTS12	1628	24	5	1623	0.012493	0.006939	0.3454	0.4372	0.2213	A↓	0.966347	0.190549	0.30892	0.0694275	0.146771	0.188463	0.0958684
ADAMTS19	1199	23	6	1193	0.005843	0.002341	0.0669	0.2237	0.1037	V↑	8.05238	0.00849084	0.00315836	0.180599	0.475885	0.241254	0.0906125
ADAMTS6	1119	24	0	1119	0.0003055	0.000802	0.0965	0.0286	0.0311	P↓	3.53333	0.0939668	0.103553	0.549828	0.0642307	0.0867145	0.101707
AGTPBP1	1228	25	13	1215	0.0033675	0.00371	0.2811	0.1346	0.1265	V↓A↓↓	3.75319	0.0682097	0.148508	0.163581	0.14316	0.445494	0.0310483	3' end trimmed to last conserved codon due to variable length among species
ALDH7A1	536	18	4	532	0.006453	0.002777	0.0839	0.3515	0.1446	V↑	4.25681	0.0487956	0.0173247	0.285946	0.409954	0.18169	0.0562894
ANKRD34B	495	1	4	491	0.0147325	0.012641	0.2545	0.2764	0.2009	null		0.388666	0.163402	0.176484	0.139135	0.0572518	0.0750601
ANKRD55	655	11	1	654	0.0107555	0.010289	0.4512	0.3906	0.3538	null		0.415475	0.168699	0.178982	0.151476	0.0633325	0.0220361
ANXA1	342	12	0	342	0.001836	0.007197	0.146	0.1241	0.3493	null		0.306381	0.22107	0.248984	0.101564	0.0733521	0.0486493
ARHGEF39	338	9	0	338	0.0083475	0.007149	0.2366	0.48	0.2627	null		0.338694	0.111767	0.209441	0.23187	0.0770286	0.0311996
ARID3C	457	8	4	453	0.0142945	0.002976	0.1135	0.2937	0.0868	V↑	3.59736	0.0904341	0.0471706	0.0817226	0.546372	0.199179	0.0351221
ARL14EPL	157	3	0	157	0.011543	0.02076	0.5149	0.3654	999	A↑	4.93737	0.054622	0.644916	0.0193148	0.0219182	0.202222	0.0570067
ATG10	232	7	7	225	0.01023	0.008062	0.3264	0.84	0.7809	P↑	0.925535	0.238745	0.109136	0.379237	0.158782	0.0781803	0.0359201
BDP1	2234	40	45	2189	0.02185	0.019024	0.6864	0.9003	0.5728	V↑	0.479121	0.227025	0.159197	0.0969849	0.288478	0.161659	0.0666557
CCBE1	393	11	0	393	0.0075165	0.001248	0.1104	0.3078	0.0948	V↑	0.924897	0.21864	0.0774613	0.204449	0.347192	0.116774	0.0354833
CELF4	520	13	0	520	1e-06	0	0.0001	0.0001	0.0001	null		0.457107	0.156979	0.156979	0.156979	0.0536798	0.0182775
CEP120	1030	21	16	1014	0.0070425	0.008817	0.3407	0.2469	0.3043	null		0.313269	0.113712	0.260134	0.189362	0.0710484	0.0524732
CETN3	167	5	0	167	3.5e-06	2e-06	0.1114	0.0001	0.0001	P↓	2.48718	0.142701	0.0776094	0.494896	0.151797	0.0936268	0.03937
CHRNA6	493	6	0	493	0.011685	0.008028	0.214	0.5211	0.1971	V↑	1.81969	0.178554	0.0703769	0.100462	0.443517	0.1532	0.0538908
CHRNB3	455	6	0	455	0.008398	0.006927	0.1207	0.5499	0.2272	V↑	3.11392	0.0761513	0.0286962	0.249481	0.36129	0.2112	0.0731812
CHSY3	854	3	1	853	0.008203	0.003843	0.0718	0.3161	0.112	V↑	10.4813	0.00282193	0.00100179	0.0865042	0.532762	0.278178	0.0987318
CNTFR	362	8	2	360	9.5e-06	0.002457	0.0537	0.0001	0.083	V↓	5.27051	0.0429943	0.0192387	0.0434489	0.599637	0.221861	0.0728203
COMMD10	199	7	0	199	0.0135025	0.002098	0.1618	0.8532	0.0656	V↑	4.4494	0.0410476	0.0226154	0.0944981	0.379719	0.152106	0.310014
DEPDC1B	529	11	0	529	0.007795	0.006112	0.191	0.2267	0.2098	null		0.442084	0.152811	0.156914	0.163035	0.0567217	0.0284344
DIRAS2	199	1	0	199	2.5e-06	0.002305	0.0129	0.0001	0.0335	null		0.437197	0.176151	0.134392	0.169508	0.062234	0.0205187
DMRT2	504	3	6	498	0.0089225	0.011592	0.2043	0.3784	0.371	null		0.269646	0.1745	0.151025	0.161637	0.130276	0.112916
DOCK8	2107	48	9	2098	0.003241	0.006219	0.194	0.1652	0.1855	null		0.419626	0.152885	0.166778	0.174297	0.0639838	0.0224297
EGFLAM	1037	24	14	1023	0.0101295	0.003989	0.1485	0.3326	0.1161	V↑A↓	7.62423	0.0143072	0.00745521	0.008876	0.226157	0.0958631	0.647341
ELAVL2	388	7	7	381	0.0053505	0.015102	0.1431	0.7634	0.2624	V↑	2.02089	0.109698	0.0518043	0.269967	0.301322	0.227545	0.0396632
ELOVL7	281	7	2	279	1.5e-06	2e-06	0.039	0.0001	0.0001	null		0.317488	0.140153	0.296503	0.148922	0.0670523	0.029883	Scan, Mate, Apho truncated by two codons at 5' end due to point mutation in start codon
EMB	319	8	11	308	0.0138725	0.030708	0.8965	0.4322	1.0254	V↓	0.312667	0.300508	0.108637	0.105355	0.351358	0.118055	0.0160872
ENC1	589	1	0	589	0.000688	0.002522	0.0081	0.029	0.1113	A↑	4.17881	0.0539631	0.436028	0.19107	0.0202299	0.232861	0.0658492
ERMP1	887	15	3	884	0.0080175	0.00866	0.1964	0.2662	0.3881	A↑	0.570208	0.206278	0.274329	0.24203	0.0882724	0.139731	0.0493595
ESM1	193	3	0	193	0.0012235	1e-06	0.1275	0.203	0.0001	null		0.423795	0.220494	0.128093	0.137729	0.0695633	0.0203256
FAM169A	670	12	0	670	0.0091325	0.014411	0.5563	0.3778	1.0347	A↑	0.24748	0.2233	0.252714	0.0874046	0.164536	0.149928	0.122117
FAM172A	401	10	0	401	0.001855	3e-06	0.0285	0.0897	0.0001	null		0.261189	0.236728	0.0916753	0.209497	0.150816	0.0500934
FBXO4	318	6	2	316	0.0095525	0.001534	0.3414	0.3712	0.0498	A↓	2.31385	0.155189	0.493525	0.0815189	0.0560141	0.162066	0.0516871
FGF10	212	3	1	211	0.001992	1e-06	0.0001	0.1462	0.0001	V↑	0.346527	0.255729	0.0845311	0.23617	0.304108	0.0919849	0.0274769
GALT	364	11	0	364	0.007417	0.001195	0.0917	0.1741	0.0206	A↓	1.00154	0.186284	0.307367	0.0620714	0.159911	0.215872	0.0684951
GAS1	327	1	3	324	0.0033085	0.001167	0.0738	0.0513	0.0069	A↓	5.7008	0.0266204	0.460391	0.204322	0.00873957	0.167705	0.132221
GDNF	218	2	0	218	0.001744	0.002181	0.1712	0.1036	0.0578	null		0.406161	0.196793	0.132749	0.128891	0.0657528	0.0696539
GFM2	777	20	1	776	0.002977	0.00608	0.1217	0.1055	0.3205	A↑	2.14667	0.158097	0.462452	0.0775278	0.0660082	0.168889	0.0670262
GOLM1	396	9	4	392	0.017281	0.017722	0.5774	0.7783	0.5053	null		0.426886	0.155755	0.145153	0.185243	0.0645908	0.0223722
GRAMD2B	436	14	0	436	0.0143835	0.002128	0.1962	0.7003	0.0571	V↑A↓	9.19523	0.00453043	0.0193269	0.00366753	0.291357	0.449632	0.231486
HCN1	870	8	25	845	0.003062	0.00206	0.0189	0.0964	0.0851	P↑	6.8215	0.0172114	0.0169164	0.521298	0.0921052	0.253443	0.0990258
HEXB	564	14	4	560	0.006767	0.008805	0.2434	0.2358	0.21	null		0.447065	0.163099	0.160033	0.154326	0.0562225	0.0192552
HINT2	160	5	0	160	0.0126065	0.007746	0.1973	0.1662	0.1255	null		0.482004	0.158645	0.158599	0.14194	0.0461058	0.0127062
HTR1A	412	1	0	412	0.0026155	0.005092	0.0842	0.0696	0.1614	null		0.375081	0.216347	0.159556	0.140359	0.0750377	0.0336192
IDUA	631	14	2	629	0.0060565	0.005386	0.2242	0.2334	0.2504	null		0.450615	0.159956	0.157045	0.157003	0.0556497	0.0197311
IL6ST	918	15	0	918	0.0031735	0.000994	0.2495	0.1636	0.0362	A↓	7.55013	0.00896933	0.391065	0.0212888	0.00405855	0.215917	0.3587
ISOC1	295	5	8	287	0.004179	0.001742	0.0529	0.1511	0.0682	null		0.349487	0.112898	0.197924	0.237205	0.0776822	0.0248042
KANK1	1357	11	0	1357	0.0070555	0.013452	0.1566	0.2605	0.3127	P↑	6.90674	0.0181547	0.123662	0.57381	0.0148342	0.182822	0.0867167
KIAA1328	620	11	7	613	0.0205845	0.019427	0.6737	1.1461	0.7461	null		0.320918	0.111506	0.151967	0.290417	0.104178	0.0210141
KLF4	454	5	7	447	0.0049315	0.012925	0.0645	0.0526	0.6719	A↑	16.1678	0.000172395	0.558866	0.000148595	0.000171885	0.205028	0.235613
LPL	486	10	1	485	0.004413	0.005307	0.1541	0.2161	0.1491	null		0.43155	0.148294	0.164937	0.173456	0.0590856	0.0226777
LRRC2	372	8	0	372	0.002074	0.004907	0.2065	0.0666	0.2218	V↓	0.202731	0.304403	0.105949	0.121338	0.336877	0.112238	0.0191947
LYSMD3	293	2	6	287	0.0087125	0.004885	0.2681	0.4402	0.2295	null		0.420714	0.143978	0.149584	0.201628	0.0658702	0.0182256
MARVELD2	532	6	7	525	0.010174	0.006477	0.1158	0.4333	0.1581	V↑	5.92702	0.0298542	0.0103317	0.105849	0.578152	0.238792	0.0370209
MINAR2	216	3	1	215	0.0179485	0.00439	0.2333	0.7121	0.3953	V↑	0.672382	0.236144	0.0750256	0.153205	0.330508	0.113727	0.0913907
MSH3	1091	24	1	1090	0.002364	0.007642	0.2257	0.0919	0.3395	A↑V↓	4.01494	0.0553554	0.0474195	0.0489629	0.257738	0.178433	0.412091
MTX3	315	9	0	315	0.001633	0.014411	0.6428	0.1082	0.477	V↓	0.892213	0.220652	0.0765483	0.101153	0.344707	0.13017	0.126769
NAA35	725	22	0	725	0.0005005	0.001908	0.0194	0.0158	0.099	A↑	1.73484	0.18157	0.432275	0.103474	0.0740227	0.153738	0.0549209
NADK2	476	12	7	469	0.0064655	0.004955	0.1535	0.4196	0.2058	V↑	0.502043	0.238981	0.0844197	0.20291	0.307171	0.117013	0.0495058
NPR3	518	8	6	512	0.0045615	0.001788	0.1591	0.1569	0.1563	null		0.452904	0.155382	0.163916	0.155402	0.0530867	0.0193097
NSA2	260	6	0	260	2.5e-06	2e-06	0.0001	0.0001	0.0001	null		0.479353	0.152523	0.152523	0.152523	0.0480716	0.0150059
OXCT1	515	17	2	513	0.0006755	0.000914	0.0643	0.0453	0.0704	null		0.443814	0.153149	0.167188	0.161066	0.0551839	0.0196002
PALM2AKAP2	1331	12	7	1324	0.0078785	0.008458	0.2137	0.3354	0.2701	P↑	0.917276	0.2104	0.088343	0.332835	0.213848	0.103148	0.0514257
PIK3R1	724	15	0	724	0.003037	0.001918	0.0527	0.1764	0.16	P↑	2.58784	0.118714	0.0685282	0.432956	0.174521	0.152256	0.0530241
PLCXD3	322	3	0	322	0.002214	2e-06	0.0732	0.0754	0.0001	null		0.341945	0.29941	0.114639	0.113534	0.0975434	0.0329292
PLK2	664	14	0	664	0.002541	0.00143	0.0578	0.0894	0.061	null		0.402916	0.140731	0.19363	0.174827	0.0609071	0.0269885
PMAIP1	86	2	3	83	0.003837	1e-06	0.4736	0.2091	0.0001	null		0.410782	0.172011	0.258402	0.10025	0.0414386	0.0171165
PRUNE2	3084	20	38	3046	0.0149665	0.016533	0.4999	0.4731	0.5613	null		0.398809	0.186788	0.158281	0.159429	0.0720255	0.0246686
PSD3	1040	16	14	1026	0.014979	0.01091	0.3814	0.4878	0.5937	null		0.304931	0.197758	0.162528	0.137641	0.104315	0.0928272
RANBP3L	480	15	8	472	0.013477	0.008433	0.425	1.9624	0.5185	V↑	4.8017	0.0577011	0.0196806	0.0486569	0.636592	0.228809	0.008561
RASEF	721	17	0	721	0.0034445	0.004583	0.1726	0.1637	0.1723	null		0.449887	0.157611	0.159208	0.158422	0.0553329	0.0195395
RHOBTB3	607	12	0	607	0.009023	0.011284	0.2214	0.4158	0.4587	P↑	1.46214	0.153005	0.1762	0.317837	0.120667	0.172287	0.0600057
RIC1	1423	26	1	1422	0.002901	0.003507	0.1283	0.164	0.1475	null		0.425732	0.157536	0.152968	0.176338	0.0669855	0.0204403
RIT2	217	5	0	217	0.001845	0.002167	0.0762	0.0659	0.3289	null		0.430355	0.212377	0.13625	0.135645	0.0651504	0.0202229
RUSC2	1610	11	3	1607	0.010735	0.003538	0.144	0.2415	0.1932	V↑	2.53318	0.119269	0.0476603	0.181979	0.423254	0.203491	0.0243467
S1PR3	381	1	0	381	2.5e-06	0.001283	0.1924	0.0001	0.0423	A↓V↓↓	5.01967	0.0341204	0.0308466	0.175891	0.319928	0.419779	0.0194353
SEMA6A	1044	19	0	1044	0.0023515	0.013521	0.0818	0.1016	0.5039	A↑	27.3206	7.58409e-07	0.649367	0.00173118	3.32158e-07	0.256353	0.0925475
SGTB	304	10	0	304	0.0023885	0.001491	0.0867	0.222	0.055	null		0.406637	0.152516	0.132981	0.213981	0.0752755	0.0186098
SIGMAR1	223	4	0	223	0.003909	0.003882	0.0744	0.0675	0.169	null		0.441892	0.193341	0.146657	0.140544	0.0595483	0.0180172
SLC24A2	650	10	1	649	0.0012105	0.003656	0.1118	0.0503	0.1172	null		0.306998	0.109959	0.200752	0.199818	0.0696101	0.112863
SLC26A1	713	2	1	712	0.0073085	0.008681	0.1187	0.2476	0.3701	P↑	6.10016	0.0266474	0.109603	0.562713	0.0230013	0.186833	0.0912019
SLC27A6	631	10	0	631	0.004083	0.007688	0.178	0.2074	0.3322	null		0.325547	0.252925	0.184464	0.114704	0.0913097	0.0310502
SLC35D2	336	12	3	333	0.006471	0.010129	0.2826	0.2339	0.9316	A↑	0.914384	0.241331	0.381215	0.107047	0.0938932	0.131926	0.0445876
SLC44A1	712	15	0	712	0.0078365	0.002052	0.0749	0.6334	0.0914	V↑	13.6362	0.000707643	0.000292397	0.0126758	0.646954	0.234637	0.104733
SLC46A2	452	4	1	451	0.010697	0.002186	0.1815	0.3273	0.0609	A↓	0.899963	0.166946	0.261819	0.0648806	0.194652	0.215842	0.095861
SMARCA2	1568	33	0	1568	0.00069	0.002352	0.0232	0.0326	0.0944	A↑	5.00358	0.0448233	0.547039	0.0981678	0.0161305	0.222494	0.0713452
SPTLC1	477	15	0	477	0.0030145	0.003773	0.0901	0.1002	0.184	null		0.395175	0.222586	0.144551	0.134835	0.0766453	0.0262062
ST8SIA4	366	5	7	359	0.003626	0.003833	0.1264	0.1175	0.3045	null		0.384748	0.218102	0.127871	0.131067	0.0724661	0.0657451
ST8SIA5	410	8	0	410	0.000923	4e-06	0.0247	0.08	0.0001	null		0.314031	0.250605	0.109182	0.167935	0.123163	0.0350833
SYK	635	13	0	635	0.0011945	0.000711	0.0841	0.0508	0.031	null		0.329811	0.193141	0.225146	0.138792	0.0840619	0.0290493
SYT4	425	4	0	425	2.5e-06	0.001103	0.076	0.0001	0.0356	V↓	1.3438	0.152336	0.0601185	0.285145	0.298267	0.132495	0.0716375
TAF1C	938	14	5	933	0.015579	0.010732	0.2276	0.3194	0.2639	P↑	0.038752	0.270062	0.0998067	0.275345	0.219048	0.0859756	0.0497628
TARS1	711	19	1	710	0.0030785	0.001316	0.0481	0.1138	0.0522	V↑	0.211232	0.242642	0.0855781	0.259926	0.269671	0.094589	0.0475947
TBCA	108	4	0	108	1.5e-06	0.004077	0.019	0.0001	0.0598	null		0.496698	0.170211	0.132218	0.14471	0.0452175	0.0109452
TESK1	692	10	2	690	0.0080735	0.004559	0.1747	0.1938	0.0615	A↓	4.03267	0.0546554	0.410503	0.0785739	0.0226612	0.148469	0.285137
TLE1	780	20	0	780	0.000512	0.001223	0.012	0.0236	0.0575	null		0.272709	0.271542	0.210151	0.0990951	0.110158	0.0363453
TMEM271	367	1	12	355	0.0085535	0.002253	0.0629	0.0865	0.0395	null		0.401247	0.178872	0.133398	0.181864	0.0698896	0.0347289
TMEM8B	795	13	0	795	0.0029565	5e-06	0.0225	0.0531	0.0001	V↑A↓	1.52525	0.124203	0.194089	0.0449502	0.173816	0.266279	0.196662
TPGS2	291	7	0	291	0.0011455	0.00647	0.1128	0.0636	0.3017	null		0.332564	0.272567	0.109393	0.137802	0.100836	0.0468383
TRABD2A	513	7	8	505	0.01253	0.006544	0.2084	0.339	0.2502	P↑	1.2964	0.186564	0.0645672	0.356728	0.133199	0.0482052	0.210737
TRPM3	1702	26	2	1700	0.001964	0.002515	0.0539	0.0643	0.1097	P↑	0.607356	0.202027	0.257032	0.273712	0.0744729	0.101881	0.0908757
UGCG	394	9	0	394	3.5e-06	0.002339	0.0142	0.0001	0.1394	A↑	2.36482	0.129138	0.421276	0.0620942	0.0940004	0.215348	0.0781436
F) Mitochondrial protein-coding genes.
					dN		dN/dS					model weights
gene	cds	exons*	gaps	N	Vidua	Aimb	outgroup	Vidua	Aimb	best	∆AICc	null	A	P	V	VA	VAp
13 mt coding genes	3788	1	0	3788	0.0244128	0.0306578	0.0309	0.0388	0.0516	V↑A↑↑	70.3987	5.16521e-16	2.09248e-08	8.84124e-05	4.78324e-16	5.42639e-07	0.999911
mt Complex I	2122	1	0	2122	0.0344701	0.0399786	0.042	0.0563	0.0744	V↑A↑↑	64.0695	1.22242e-14	1.19448e-08	0.000601602	2.03313e-14	6.12966e-07	0.999398	seven ND genes combined
ND1	325	1	0	325	0.0263542	0.0436364	0.0131	0.0201	0.0345	P↑	8.28867	0.00899126	0.223349	0.567129	0.00215373	0.116521	0.0818568
ND2	346	1	0	346	0.0569887	0.052306	0.0322	0.0345	0.0595	A↑	3.21203	0.0726169	0.361843	0.246482	0.0152561	0.0766204	0.227182
ND3	116	1	0	116	0.0726447	0.0415195	0.025	0.0335	0.0566	null		0.989529	0.00405275	0.00511229	0.00130104	4.52145e-06	6.40324e-09
ND4	459	1	0	459	0.0244152	0.0378518	0.0163	0.0201	0.0431	A↑	13.8835	0.000621184	0.642666	0.0407407	0.000155246	0.223684	0.0921323
ND4L	98	1	0	98	0.019731	0.044043	0.0149	0.0233	0.0688	null		0.999814	0.000141447	4.34447e-05	1.36383e-06	9.66909e-11	1.27227e-17
ND5	605	1	0	605	0.0341676	0.0419732	0.0237	0.0486	0.0408	P↑	18.3524	8.35977e-05	0.000157566	0.807909	0.00587208	0.101377	0.0846008
ND6	173	1	0	173	0.0577041	0.0439815	0.0546	0.0962	0.0863	null		0.53992	0.0482327	0.293533	0.104094	0.0134169	0.000803263
mt Complex III	380	1	0	380	0.0137709	0.0120187	0.024	0.0233	0.0157	null		0.454819	0.246062	0.116357	0.101824	0.0539542	0.0269836	cytochrome b
mt Complex IV	1004	1	0	1004	0.00776037	0.0167449	0.0121	0.0108	0.025	A↑	12.9141	0.000907705	0.578376	0.00612483	0.000786897	0.204739	0.209066	three CO genes combined
COI	516	1	0	516	0.00369875	0.0105871	0.0054	0.0055	0.0139	A↑	4.91444	0.0477366	0.557197	0.118429	0.0172877	0.144299	0.115051
COII	227	1	0	227	0.0163701	0.0206351	0.0232	0.0232	0.0371	null		0.625161	0.182019	0.0915151	0.0773819	0.0212191	0.00270348
COIII	261	1	0	261	0.00894363	0.0250586	0.0124	0.0105	0.038	A↑	7.5731	0.0143041	0.630865	0.0378661	0.00455227	0.100707	0.211705
mt Complex V	282	1	0	282	0.0321374	0.0406345	0.0307	0.0478	0.0554	P↑	1.64752	0.194111	0.169806	0.442387	0.060731	0.110165	0.0228001	two ATPase genes combined
ATP6	227	1	0	227	0.0269725	0.0256287	0.0114	0.0183	0.0286	P↑	0.710648	0.251326	0.270745	0.358552	0.0390185	0.0721027	0.00825619
ATP8	55	1	0	55	0.068263	0.114867	0.1675	0.3199	0.1963	null		0.999915	1.81087e-05	2.38819e-05	4.30202e-05	2.81847e-09	2.05325e-12
G) Nuclear-encoded Complex I genes.
					dN		dN/dS					model weights
gene	cds	exons*	gaps	N	Vidua	Aimb	outgroup	Vidua	Aimb	best	∆AICc	null	A	P	V	VA	VAp
Complex I: combined	7210	194	66	7144	0.00458	0.010305	0.1824	0.1978	0.4842	V↑A↑↑	58.5465	1.86638e-13	0.0183437	1.67594e-05	6.88894e-14	0.964306	0.0173333
NDUFA1	70	3	0	70	0	0.022164	0.0955	0.0001	999	A↑	2.21849	0.128176	0.388641	0.388615	0.0222176	0.062888	0.00946235
NDUFA2	100	3	0	100	4e-06	0.016335	0.2084	35.3744	999	A↑	1.96469	0.176045	0.470164	0.23374	0.0411085	0.0526519	0.0262911
NDUFA3	84	4	3	81	0.021016	0.086019	0.2585	0.2877	0.6211	null		0.447172	0.250925	0.166645	0.0896661	0.0368393	0.00875271
NDUFA5	116	5	0	116	0.007446	0.017112	0.0407	0.4558	1.9031	P↑	8.69776	0.00734214	0.144066	0.56822	0.00385788	0.223229	0.0532847
NDUFA6	124	3	0	124	0.0022425	0.006569	0.0001	0.1124	0.233	P↑	7.05447	0.019477	0.0763185	0.662798	0.0104838	0.185121	0.0458013
NDUFA7	116	4	1	115	0.0026325	0.015787	0.1126	0.1637	0.4291	P↑	0.48597	0.25782	0.214579	0.328733	0.0652695	0.113693	0.0199056
NDUFA8	172	4	0	172	0.001679	0.004519	0.2204	0.0498	0.3087	null		0.375141	0.117951	0.119377	0.27513	0.0994946	0.0129067
NDUFA9	374	11	1	373	0.0048515	0.016547	0.2021	0.3767	0.4975	P↑	1.58799	0.159518	0.256955	0.352889	0.0652932	0.124372	0.0409718
NDUFA10	365	10	6	359	0.006971	0.015421	0.1996	0.3708	0.5889	P↑	3.16135	0.0882329	0.21878	0.428657	0.0442078	0.161403	0.0587197
NDUFA11	136	4	0	136	3e-06	0.003569	0.1038	0.0001	999	A↑	0.815564	0.219501	0.330016	0.0594482	0.147718	0.193336	0.0499803
NDUFA12	146	4	0	146	0	5e-06	0.1089	0.0001	0.0001	P↑	0.674694	0.236065	0.253763	0.33078	0.0654965	0.0899401	0.0239557
NDUFA13	144	5	0	144	0.0023145	0.007887	0.0729	0.042	999	A↑	0.943032	0.224666	0.36001	0.158019	0.068653	0.161811	0.0268402
NDUFAB1	147	3	3	144	0.002136	0.002933	0.4341	0.0815	0.2447	null		0.339654	0.095997	0.21544	0.255306	0.0767919	0.0168105
NDUFB1	58	2	0	58	1e-06	2e-06	0.3448	0.0001	53.1438	null		0.617055	0.0821959	0.140996	0.140996	0.016937	0.00181982
NDUFB2	97	3	0	97	0.007011	5e-06	0.1898	0.1519	0.0001	null		0.355651	0.344033	0.124993	0.0815165	0.0773877	0.0164193
NDUFB3	102	2	6	96	0.0029955	0.024484	0.1624	0.129	999	A↑	8.23588	0.0123579	0.759175	0.0232841	0.00318948	0.165538	0.036455
NDUFB4	137	3	0	137	3.5e-06	0.030687	0.2467	0.0001	0.4774	V↓	1.43174	0.191323	0.103474	0.0560456	0.391442	0.239222	0.0184928
NDUFB5	198	6	9	189	0.004795	0.01432	0.317	0.2224	1.1326	A↑	0.0286233	0.31327	0.317786	0.12909	0.109458	0.101055	0.0293418
NDUFB6	128	4	0	128	0.0078265	0.019475	0.3668	0.1509	999	A↑V↓	4.47753	0.0648	0.24386	0.0304175	0.037185	0.607935	0.0158026
NDUFB7	129	3	7	122	0.005038	0.021344	0.1091	0.3671	0.5361	P↑	4.06987	0.0744713	0.141924	0.569835	0.0293749	0.147659	0.0367351
NDUFB8	191	5	1	190	0.008485	0.004689	0.0905	0.6107	0.1518	V↑	1.6906	0.147264	0.0453765	0.274401	0.342931	0.147654	0.042373
NDUFB9	174	4	0	174	0.0017135	0.012314	0.1338	0.0286	0.6654	A↑V↓	1.88288	0.117083	0.283656	0.0343949	0.17964	0.300162	0.0850646
NDUFB10	174	4	0	174	0.0090815	0.014544	0.2134	0.0958	1.0931	A↑	1.34815	0.174581	0.342567	0.0510781	0.188579	0.199769	0.0434249
NDUFB11	135	3	0	135	0.0092205	0.026195	0.0793	0.173	999	V↑A↑↑	11.5666	0.00148275	0.379556	0.0711451	0.000419986	0.48163	0.065766
NDUFC1	84	3	4	80	0.013601	0.011792	0.6306	0.2124	0.1605	null		0.310289	0.175526	0.305143	0.140567	0.0574036	0.0110707
NDUFC2	111	3	0	111	0.018352	0.053559	0.2296	0.3324	1.6173	A↑	4.5147	0.074375	0.710855	0.106365	0.0184584	0.04966	0.0402875
NDUFS1	728	18	0	728	0.000573	0.00196	0.1133	0.0263	0.132	V↓	0.802734	0.247697	0.0925785	0.127847	0.370026	0.131887	0.0299646
NDUFS2	466	14	3	463	0.004544	0.002707	0.0254	0.079	0.0629	P↑	1.84996	0.143772	0.0776827	0.362567	0.235157	0.139289	0.0415322
NDUFS3	256	7	0	256	0.002771	0.001916	0.0428	0.1289	0.1116	null		0.367719	0.136147	0.214725	0.190439	0.0699608	0.0210093
NDUFS4	171	5	0	171	1.5e-06	0.00281	0.2515	0.0001	0.411	V↓	0.283252	0.301026	0.0977439	0.119935	0.346826	0.104905	0.0295628
NDUFS5	106	2	0	106	0.0068935	0.003469	0.0646	999	0.0473	V↑	2.0513	0.144656	0.0370976	0.19421	0.403432	0.140935	0.0796697
NDUFS6	129	4	2	127	0.0100305	3e-06	0.2289	1.3253	0.0001	null		0.388523	0.134284	0.111759	0.238442	0.101562	0.0254295
NDUFS7	216	8	0	216	0.0030835	3e-06	0.1035	0.1351	0.0001	A↓	0.475739	0.247884	0.314452	0.124095	0.0815512	0.202328	0.0296889
NDUFS8	208	6	0	208	0.0028255	0.001865	0.0231	0.0758	0.0535	null		0.332438	0.115399	0.260598	0.184948	0.0830058	0.0236111
NDUFV1	457	10	0	457	6e-06	0.000821	0.009	0.0001	0.0143	null		0.329094	0.124652	0.123512	0.28383	0.105692	0.0332187
NDUFV2	244	8	0	244	0.001929	0.001925	0.0852	0.2648	0.1313	null		0.402945	0.129334	0.16588	0.217523	0.0678239	0.0164934
NDUFV3	417	4	20	397	0.010672	0.017536	0.689	0.7415	0.9768	null		0.436778	0.185473	0.156708	0.147116	0.0531834	0.0207422
H) Complex I codons from 37 nuclear-encoded genes sorted into 10 categories of proximity to mtDNA-encoded residues in a structural model for Complex I (see Fig. 4).																		only codons present in Anomalospiza were included in analysis
					dN		dN/dS					model weights
gene	cds	exons*	gaps	N	Vidua	Aimb	outgroup	Vidua	Aimb	best	∆AICc	null	A	P	V	VA	VAp
proximity category 1	718	—	15	703	0.005579	0.017076	0.2414	0.2216	0.683	A↑	6.13845	0.020922	0.450351	0.136591	0.00826401	0.160378	0.223494
proximity category 2	718	—	4	714	0.004384	0.016412	0.1878	0.1163	0.6404	A↑V↓	9.75673	0.00331426	0.329193	0.0179388	0.00326971	0.210739	0.435545
proximity category 3	718	—	1	717	0.003284	0.015458	0.1778	0.1094	0.6559	A↑	8.67567	0.00733935	0.561766	0.0157989	0.00473064	0.304399	0.105967
proximity category 4	718	—	0	718	0.0048355	0.009036	0.1018	0.1875	0.2995	P↑	4.01131	0.0433897	0.280224	0.322428	0.0274632	0.240745	0.0857494
proximity category 5	717	—	2	715	0.009727	0.008458	0.1627	0.3767	0.363	P↑	8.03472	0.0129584	0.015738	0.719897	0.032947	0.0580028	0.160457
proximity category 6	717	—	2	715	0.0040655	0.012225	0.2427	0.1473	0.5852	A↑	3.20965	0.0785651	0.391019	0.0561495	0.0656191	0.249169	0.159479
proximity category 7	717	—	10	707	0.004905	0.006376	0.0873	0.2433	0.3445	P↑	9.87566	0.00515657	0.0349842	0.719175	0.00871252	0.12478	0.107192
proximity category 8	717	—	4	713	0.004132	0.007194	0.2559	0.2351	0.2594	null		0.449162	0.157498	0.157266	0.159969	0.0558681	0.020237
proximity category 9	717	—	1	716	0.0025655	0.004066	0.1644	0.1884	0.4629	A↑	0.56819	0.248323	0.329912	0.173502	0.0879151	0.118532	0.0418163
proximity category 10	717	—	0	717	0.0009765	0.004307	0.1134	0.0549	0.2232	null		0.300117	0.220351	0.105245	0.175038	0.127307	0.071943
I) Nuclear-encoded Complex II genes.
					dN		dN/dS					model weights
gene	cds	exons*	gaps	N	Vidua	Aimb	outgroup	Vidua	Aimb	best	∆AICc	null	A	P	V	VA	VAp
Complex II combined	1270	33	5	1265	0.00168	0.002018	0.0797	0.059	0.0806	null		0.417251	0.149592	0.152846	0.187511	0.0670198	0.02578
SDHA	667	15	2	665	0.001567	1e-06	0.0373	0.0554	0.0001	null		0.352057	0.230171	0.123653	0.149238	0.0935108	0.0513692
SDHB	281	8	1	280	0.0021725	7e-06	0.0259	0.0358	0.0001	null		0.355838	0.24311	0.151793	0.117918	0.0827085	0.0486332
SDHC	169	6	0	169	0.0027285	0.012435	0.1254	0.1687	0.1664	null		0.477167	0.152777	0.165601	0.14611	0.0449946	0.0133504
SDHD	153	4	2	151	2e-06	4e-06	0.1169	0.0001	0.0001	P↓	3.13481	0.117998	0.108991	0.565704	0.082928	0.0823627	0.0420164
J) Nuclear-encoded Complex III genes plus cytochrome c, which bridges between complexes III and IV.
					dN		dN/dS					model weights
gene	cds	exons*	gaps	N	Vidua	Aimb	outgroup	Vidua	Aimb	best	∆AICc	null	A	P	V	VA	VAp
Complex III combined	2711	67	19	2692	0.0048185	0.006596	0.2164	0.2064	0.204	null		0.431177	0.161507	0.156616	0.159414	0.0598388	0.0314461
BCS1L	419	7	0	419	0.0008255	2e-06	0.0747	0.0407	0.0001	A↓	0.379779	0.229554	0.277558	0.185921	0.0889533	0.110779	0.107234
Cyt1, CYC1	330	7	7	323	0.0085265	0.014208	0.1246	0.1046	0.1224	null		0.461957	0.151605	0.15396	0.161969	0.0527992	0.017709
QCR1 (COR1, UQCRC1)	481	13	0	481	0.0075275	0.006353	0.2071	0.3099	0.2527	null		0.405961	0.14455	0.176183	0.184145	0.0665978	0.0225634
QCR2, UQCRC2	457	14	1	456	0.003394	0.00386	0.3843	0.1904	0.2161	null		0.323189	0.149585	0.192715	0.204182	0.0960641	0.034264
QCR7, UQCRB	111	4	0	111	0.004137	4e-06	0.0945	0.1994	0.0001	null		0.419945	0.215897	0.120632	0.124025	0.0599714	0.0595297
QCR8, UQCRQ	82	2	0	82	0.009427	0.018897	0.2711	0.2944	0.2903	null		0.604121	0.122574	0.122804	0.122533	0.0236489	0.0043186
TTC19	364	10	11	353	0.0049935	0.002757	0.2394	0.2498	0.1312	null		0.438624	0.180567	0.156242	0.145484	0.0595843	0.0194995
UQCR10, QCR9	59	2	0	59	2e-06	0.006591	0.3544	0.0001	0.0359	null		0.399047	0.223254	0.168086	0.108971	0.08007	0.0205725
UQCR11, QCR10	56	2	0	56	2.5e-06	0.034388	0.2675	0.0001	0.2674	null		0.590879	0.0762025	0.0789847	0.226123	0.0252915	0.00251882
UQCRFS1, ISP, Rieske	273	2	0	273	0.0054855	0.005602	0.1255	0.3024	0.1603	null		0.359134	0.117168	0.162632	0.24997	0.0834799	0.0276167
UQCRH, QCR6	79	4	0	79	2e-06	0.009756	0.0762	0.0001	0.0641	null		0.563162	0.110742	0.119739	0.168951	0.0318247	0.00558121
cytochrome c (CYCS)	105	2	0	105	1.5e-06	0.004518	0.1166	0.0001	0.1256	null		0.497319	0.121093	0.127258	0.197925	0.0460633	0.0103416	transfers electron between complexes III and IV
K) Nuclear-encoded Complex IV genes.
					dN		dN/dS					model weights
gene	cds	exons*	gaps	N	Vidua	Aimb	outgroup	Vidua	Aimb	best	∆AICc	null	A	P	V	VA	VAp
Complex IV combined	1299	42	13	1286	0.0076025	0.012374	0.2166	0.2233	0.3733	A↑	1.66361	0.179766	0.413005	0.0866146	0.0644476	0.148491	0.107675
COX4	171	4	1	170	0.0038615	0.004382	0.0965	0.0691	0.1395	null		0.390094	0.11957	0.228337	0.12259	0.0370193	0.10239
COX5A	145	4	0	145	0.002145	0.003237	0.0446	0.1915	0.1924	null		0.408056	0.156318	0.191998	0.156038	0.0674738	0.0201155
COX5B	126	4	0	126	0.0074135	0.005914	0.0672	0.0732	0.1022	null		0.521624	0.14694	0.146729	0.137159	0.0378049	0.00974372
COX6A1	108	3	0	108	0.011466	0.02249	0.181	999	999	P↑	8.08163	0.00894088	0.0815473	0.508491	0.0182145	0.279544	0.103263
COX6B1	86	3	0	86	0.0076325	0.018068	0.0521	0.0512	0.058	null		0.564721	0.120174	0.158229	0.118988	0.0241578	0.0137297
COX6C	79	2	2	77	0.0098665	0.024773	0.5711	0.2605	0.7753	null		0.571527	0.121967	0.109491	0.158068	0.0300714	0.0088751	1-2 extra codons at 3' end in Apho, Mate, Scan
COX7A2	83	4	1	82	0.0223845	0.019948	0.406	2.1653	0.3485	null		0.494559	0.105456	0.101992	0.233088	0.0455226	0.0193831
COX7A2L	119	3	7	112	0.0050035	0.00872	1.3393	0.308	999	null		0.384294	0.177425	0.127765	0.202395	0.0851076	0.0230138
COX7B	78	3	0	78	0.023967	0.02742	0.4786	1.0048	1.5474	null		0.504339	0.164002	0.143122	0.128622	0.0429086	0.0170062
COX7C	63	2	0	63	5.5e-06	0.013421	0.0722	0.0001	0.1534	null		0.567692	0.121771	0.0982033	0.172821	0.0303197	0.00919353
COX8A	71	2	2	69	9e-06	0.017313	0.258	0.0001	0.1305	V↓	2.09788	0.188846	0.0391876	0.0927105	0.539084	0.113291	0.0268811
COXFA4 (NDUFA4)	83	4	0	83	0.0183905	4e-06	0.2137	0.3246	0.0001	null		0.503771	0.214142	0.110397	0.111941	0.0462703	0.0134783	see Pitceathly & Taanman (2018) NDUFA4 (renamed COXFA4) is a cytochrome-c oxidase subunit. Trends Endocrinol. Metab. 29, 452–454 (2018).
NDUFA4L2 (COXFA4L2)	87	4	0	87	3e-06	0.005172	0.035	0.0001	0.3143	null		0.444262	0.250743	0.106614	0.120808	0.0629027	0.0146707
L) Nuclear-encoded Complex V genes.
					dN		dN/dS					model weights
gene	cds	exons*	gaps	N	Vidua	Aimb	outgroup	Vidua	Aimb	best	∆AICc	null	A	P	V	VA	VAp
Compex V combined	3657	98	14	3643	0.002775	0.007017	0.0993	0.1165	0.2297	A↑	14.3171	0.000464011	0.596278	0.0299779	0.000174106	0.268203	0.104903
ATP5F1A_W	553	12	0	553	0.000732	0.005341	0.0891	0.0463	0.4833	A↑	4.2944	0.0642639	0.550153	0.03766	0.0371914	0.228869	0.0818635
ATP5F1A_Z	553	12	0	553	0.0005995	0.000856	0.0249	0.0246	0.0249	null		0.450102	0.15524	0.16058	0.155253	0.053334	0.0254912
ATP5F1B	534	10	3	531	5e-06	0.001516	0.0068	0.0001	0.0391	A↑	0.128947	0.275869	0.294241	0.100814	0.109919	0.147212	0.0719454
ATP5F1C	294	9	0	294	1.5e-06	0.001588	0.0554	0.0001	0.0482	null		0.382323	0.125644	0.157451	0.234451	0.0759276	0.0242045
ATP5F1D	168	4	2	166	3.5e-06	0.005771	0.2108	0.0001	0.1274	V↓	1.13283	0.232556	0.0700861	0.105702	0.409751	0.136387	0.0455177
ATP5F1E	51	2	0	51	0.005421	2e-06	0.0519	0.1071	26.5152	null		0.742927	0.0765446	0.0861205	0.0861205	0.00769813	0.00058885
ATP5IF1	115	3	3	112	2e-06	0.007282	0.0698	0.0001	0.1413	null		0.486604	0.156243	0.131385	0.164892	0.0493376	0.0115383
ATP5MC1	132	4	2	130	0.0053455	0.005026	0.0736	0.3677	0.1218	null		0.39624	0.134745	0.112874	0.258192	0.0728415	0.0251081
ATP5MC3	141	4	0	141	0	1e-06	0.1563	0.0001	0.0001	null		0.457478	0.211049	0.128142	0.125405	0.0566383	0.0212877
ATP5ME	71	4	0	71	3e-06	9e-06	0.0265	0.0001	0.0001	null		0.562271	0.141337	0.127074	0.109093	0.0259498	0.0342755
ATP5MF	89	4	1	88	0.0115165	0.009872	0.1275	0.106	0.4261	null		0.508391	0.178057	0.137734	0.120611	0.0372904	0.0179177
ATP5MG	107	3	0	107	3e-06	0.007044	0.0478	0.0001	0.1042	null		0.44011	0.145889	0.108182	0.21834	0.0658223	0.0216565
ATP5MJ (ATP5MPL)	56	3	0	56	0.0151165	0.043913	0.4492	0.4001	999	A↑	1.54329	0.259143	0.56061	0.0739348	0.0370296	0.0630392	0.0062429
ATP5MK (ATP5MD)	59	2	0	59	2e-06	0.016008	0.6268	0.0001	0.3542	null		0.442693	0.0612773	0.126561	0.319958	0.0445438	0.00496736
ATP5PB	255	7	3	252	0.015218	0.027316	0.1121	0.441	0.519	V↑A↑↑	8.3025	0.00766631	0.0802466	0.189783	0.0154431	0.486912	0.219949	Mate 3 codons longer at 3' end
ATP5PD	161	5	0	161	0.004869	0.014643	0.2472	0.2114	0.2829	null		0.503912	0.147754	0.1471	0.146801	0.0420606	0.0123722
ATP5PF	107	3	0	107	0.013469	0.010632	0.2003	0.4056	0.2339	null		0.472229	0.114929	0.203677	0.152591	0.0363072	0.020266
ATP5PO	211	7	0	211	0.006232	0.008603	0.1121	0.7371	0.2236	V↑	0.615751	0.212812	0.0863295	0.239822	0.289537	0.131792	0.0397081
M) Mitochondrial rRNA and tRNA genes (results from baseml expressed as substitutions per site, d).
	aligned				d							model weights
gene	sites		gaps	N	Vidua	Aimb				best	∆AICc	null	A	P	V	VA	VAp
noncoding combined	4148		77	4071	0.0345483	0.0570787				V↑A↑↑	36.0483	8.80311e-09	0.187726	0.00692925	4.96085e-06	0.592133	0.213207
12S rRNA	990		31	959	0.0283	0.0664				A↑	11.6319	0.00136745	0.458942	0.0237249	0.00188351	0.390945	0.123137
16S rRNA	1608		26	1582	0.034	0.0447				A↑	1.82544	0.126726	0.315686	0.284674	0.0442153	0.169708	0.0589917
22 tRNA genes	1550		20	1530	0.0491	0.0754				A↑	6.57964	0.0144074	0.386667	0.170557	8.4714e-09	0.318038	0.11033
N) Nuclear-encoded mitochondrial ribosomal proteins, small subunit.
					dN		dN/dS					model weights
gene	cds	exons*	gaps	N	Vidua	Aimb	outgroup	Vidua	Aimb	best	∆AICc	null	A	P	V	VA	VAp
MRPS combined	6434	153	140	6294	0.007001	0.009269	0.2482	0.2586	0.3672	A↑	5.63752	0.0315609	0.528835	0.124967	0.0115748	0.202983	0.10008
MRPS2	263	4	8	255	0.0055175	0.007159	0.1582	0.6231	0.1657	null		0.265923	0.0844621	0.245416	0.200829	0.0632024	0.140168
MRPS5	406	11	3	403	0.0047195	0.005718	0.1376	0.191	1.2932	A↑	3.34981	0.0959151	0.512022	0.0874146	0.0363183	0.197628	0.0707021
MRPS6	129	3	8	121	0.021309	0.007484	0.2062	0.2915	0.1898	null		0.515419	0.134794	0.136916	0.157718	0.0397428	0.0154111
MRPS7	233	5	0	233	0.0073655	0.005548	0.1073	0.1464	0.322	null		0.374343	0.217563	0.184261	0.123672	0.076725	0.0234366
MRPS9	372	11	0	372	0.0028615	0.008959	0.2833	0.1379	2.3054	A↑	3.89591	0.06892	0.483428	0.0288489	0.051152	0.276228	0.0914229
MRPS10	197	7	0	197	0.0038425	0.009231	0.1335	0.6968	0.3413	null		0.29588	0.133914	0.277976	0.17017	0.0943566	0.0277032
MRPS11	184	6	3	181	0.012555	0.011631	0.1805	0.3346	999	A↑	4.69235	0.0487436	0.509153	0.127988	0.0214688	0.227438	0.0652088
MRPS12	143	2	0	143	0.008379	0.005415	0.0787	0.2885	0.0568	null		0.565741	0.000328118	3.11059e-06	0.317843	0.0917875	0.0242974
MRPS14	128	3	0	128	0.0094715	0	0.0001	0.1042	0.0001	V↑	6.86608	0.0136623	0.00360843	0.423128	0.423131	0.109059	0.027412
MRPS15	246	8	9	237	0.012802	0.011991	0.2473	0.2801	0.5414	null		0.400367	0.217353	0.16566	0.126484	0.0689664	0.0211691
MRPS16	142	3	8	134	3e-06	0.002811	0.0502	0.0001	0.0321	null		0.360868	0.101294	0.207005	0.236072	0.0668429	0.0279185
MRPS17	137	2	0	137	0.002245	2e-06	0.0001	0.1804	0.0001	V↑	1.19075	0.219817	0.067767	0.180527	0.398683	0.105773	0.0274326
MRPS18A	190	6	0	190	0.008071	0.005628	0.2847	0.3604	0.298	null		0.490414	0.146768	0.15138	0.15309	0.0452044	0.0131439
MRPS18B	239	7	6	233	0.0042165	0.020853	0.099	0.0544	0.1966	null		0.346626	0.249878	0.136339	0.134508	0.101607	0.0310419
MRPS18C	138	6	8	130	0.0113325	0.020043	0.425	0.2945	1.0091	null		0.431487	0.211564	0.115024	0.146008	0.0614925	0.0344239
MRPS21	87	2	0	87	0.0029415	0.025832	0.0354	0.0219	502.647	A↑	5.6072	0.0435017	0.717948	0.0339632	0.016659	0.157442	0.0304862
MRPS22	340	8	10	330	0.003641	0.004906	0.3047	0.2542	0.1587	null		0.392319	0.201478	0.185641	0.130856	0.0677379	0.0219674
MRPS23	185	5	3	182	0.022741	0.007404	0.3256	0.9721	0.1646	V↑	0.612512	0.24744	0.129516	0.0772339	0.336105	0.146141	0.0635645
MRPS24	163	4	0	163	0.0091015	0.018892	0.1593	0.1285	0.3243	null		0.418312	0.221738	0.140903	0.132848	0.066295	0.0199031
MRPS25	171	4	2	169	0.0019465	0.010682	0.1023	0.1118	0.2599	null		0.362602	0.214566	0.231744	0.105601	0.0614161	0.0240719
MRPS26	226	4	14	212	4e-06	0.00881	0.1461	0.0001	0.0891	V↓	3.01156	0.108874	0.040792	0.0955694	0.490768	0.202777	0.0612195
MRPS27	407	11	0	407	0.007245	0.009392	0.2935	0.2242	0.3492	null		0.419451	0.154438	0.147314	0.170599	0.0601842	0.0480136
MRPS28	165	3	2	163	0.000864	0.008205	0.7467	0.1326	1.2433	null		0.473788	0.143247	0.143651	0.163997	0.050128	0.0251895
MRPS30	477	5	36	441	0.0114835	0.014815	0.2974	0.3118	0.4005	null		0.405845	0.173261	0.195665	0.137621	0.0588268	0.0287807
MRPS31	290	6	7	283	0.0133375	0.014537	0.4627	0.5935	0.5812	null		0.451509	0.152028	0.153066	0.155784	0.0535397	0.034073
MRPS33	106	2	0	106	3e-06	8e-06	0.0801	0.0001	0.0001	P↓	0.917372	0.235075	0.182197	0.371888	0.1043	0.086906	0.0196338
MRPS34	208	3	0	208	0.0057645	0.002062	0.3136	0.2187	0.0862	null		0.354124	0.207692	0.228062	0.115449	0.0687568	0.0259151	frameshift extends Lstr protein by 3 codons at 3' end; trimmed to last conserved codon for analysis
MRPS35	355	8	13	342	0.0061605	0.003132	0.2612	0.4916	0.1229	null		0.332621	0.179346	0.14684	0.166674	0.0873118	0.0872074
MRPS36	107	4	0	107	5e-07	0	0.3359	0.0001	0.0001	null		0.467506	0.11346	0.113464	0.228053	0.0535941	0.0239227
O) Nuclear-encoded mitochondrial ribosomal proteins, large subunit.
					dN		dN/dS					model weights
gene	cds	exons*	gaps	N	Vidua	Aimb	outgroup	Vidua	Aimb	best	∆AICc	null	A	P	V	VA	VAp
MRPL combined	10073	236	168	9905	0.0068115	0.007354	0.1984	0.2191	0.2459	P↑	3.02583	0.101507	0.186879	0.460834	0.0517661	0.105591	0.0934228
MRPL1	343	9	7	336	0.0135435	0.014046	0.2722	0.2717	0.4402	P↑	1.46073	0.170452	0.0832805	0.35383	0.0562258	0.0272655	0.308946
MRPL2	301	6	0	301	0.0010435	0.00412	0.0601	0.0254	0.094	null		0.395746	0.163683	0.132018	0.200639	0.0764745	0.0314402
MRPL3	353	10	14	339	0.0024665	1e-06	0.0921	0.1764	0.0001	null		0.39638	0.194993	0.131161	0.16423	0.0801714	0.0330642
MRPL4	308	9	15	293	0.013443	0.016378	0.1272	0.1185	0.398	A↑	1.54056	0.203189	0.438962	0.0925361	0.0693936	0.142708	0.0532115
MRPL9	258	7	20	238	0.009478	0.010943	0.1402	0.3244	0.1177	null		0.373186	0.122985	0.147694	0.248488	0.0809501	0.0266974
MRPL10	254	5	5	249	0.0095295	0.01433	0.1488	0.1094	0.3009	null		0.387106	0.228798	0.123975	0.14091	0.0828727	0.0363385
MRPL11	201	5	4	197	0.0019375	0.014388	0.1615	0.046	0.2142	null		0.410283	0.131779	0.124085	0.233621	0.0768044	0.0234284
MRPL12	203	4	13	190	0.008212	0.005055	0.0838	0.1092	0.2213	null		0.369767	0.157993	0.219105	0.121178	0.0501373	0.0818194
MRPL13	179	7	0	179	3.5e-06	3e-06	0.044	0.0001	0.0001	null		0.334195	0.139469	0.257497	0.172736	0.074746	0.0213574
MRPL14	146	2	0	146	0.003173	0.005902	0.162	0.0612	0.1744	null		0.44427	0.123936	0.165085	0.195841	0.0533883	0.0174795
MRPL15	294	5	0	294	4.5e-06	0.001622	0.1012	0.0001	0.0529	V↓	3.1978	0.101622	0.0358542	0.0879241	0.502785	0.196353	0.0754618
MRPL16	260	4	0	260	0.0065905	0.00404	0.0882	0.2002	0.1845	P↑	0.0376055	0.296234	0.122179	0.301857	0.17579	0.0734517	0.0304879
MRPL17	165	3	1	164	0.0054905	0.002244	0.0492	0.0245	0.0538	null		0.420349	0.123602	0.182545	0.196079	0.055588	0.0218371
MRPL18	179	4	0	179	0.0054965	0.007837	0.216	0.5631	0.1909	null		0.431091	0.132508	0.13419	0.217044	0.0637925	0.021374
MRPL19	273	6	0	273	0.003783	0.005505	0.1631	0.3283	0.1647	null		0.421622	0.135192	0.177782	0.180822	0.0574634	0.0271179
MRPL20	150	4	0	150	2e-06	0.002978	0.0358	0.0001	0.3283	null		0.416916	0.203348	0.157004	0.143278	0.0626054	0.0168479
MRPL21	187	7	0	187	0.0048915	0.004877	0.0951	0.1668	0.1681	null		0.438382	0.147042	0.186682	0.157178	0.0548397	0.0158754
MRPL22	211	7	0	211	0.003077	0.005906	0.1551	0.367	0.4589	null		0.355029	0.187909	0.207405	0.14727	0.0788099	0.0235775
MRPL23	159	5	3	156	0.006217	0.002775	0.1161	0.8487	999	P↑	2.0981	0.141646	0.111545	0.40439	0.157881	0.145013	0.0395247
MRPL24	215	5	0	215	0.007526	0.016744	0.0671	0.1057	0.1649	null		0.30048	0.282469	0.117019	0.107896	0.10317	0.0889663
MRPL27	139	4	0	139	0.0051005	0.010478	0.1568	0.1563	0.4929	null		0.414548	0.238744	0.152006	0.114367	0.0637086	0.0166262
MRPL28	248	5	0	248	0.007673	1e-06	0.0631	0.2194	0.0001	V↑	0.598015	0.241591	0.0880505	0.196725	0.32579	0.112785	0.0350579
MRPL30	164	5	6	158	0.0098355	0.004803	0.2062	0.2649	0.1592	null		0.499658	0.147656	0.142209	0.151542	0.043726	0.0152096
MRPL32	187	3	5	182	0.0126225	0.012764	0.2752	0.7247	0.3209	null		0.367802	0.111658	0.137984	0.255728	0.0764662	0.0503624
MRPL33	65	4	0	65	3e-06	0.007807	0.0001	0.0001	0.4731	A↑	1.39772	0.255022	0.512967	0.102295	0.0447844	0.0748935	0.0100383
MRPL34	104	2	5	99	0.019316	0.005077	0.2152	0.543	0.1618	null		0.492483	0.11654	0.11747	0.199107	0.0456538	0.0287462
MRPL35	182	4	10	172	0.0043575	0.00957	0.3565	0.0844	0.3197	V↓	0.946823	0.242248	0.0707681	0.133376	0.38892	0.1126	0.0520875
MRPL36	106	1	1	105	0.0098725	0.007589	0.2317	0.1142	0.0663	null		0.348971	0.181419	0.294521	0.101717	0.0564522	0.0169195
MRPL37	441	7	13	428	0.0066205	0.008078	0.2659	0.4053	0.4445	null		0.365465	0.166742	0.217651	0.151788	0.0737021	0.0246517
MRPL38	378	9	0	378	0.003592	0.004086	0.1303	0.2499	0.1785	null		0.36839	0.134996	0.20568	0.195617	0.0708027	0.0245136
MRPL39	337	10	1	336	0.0120555	0.004582	0.3724	0.5895	0.1113	A↓	1.76818	0.169515	0.410357	0.0721787	0.0981088	0.185653	0.0641882	frameshift extends Scan protein by 1 codon at 3' end; trimmed to last conserved codon for analysis
MRPL40	200	4	4	196	0.0151485	0.006856	0.3144	1.2292	0.3441	V↑	0.662114	0.251619	0.0760211	0.186559	0.350363	0.104731	0.0307067
MRPL41	135	1	0	135	0.0013215	0.002665	0.0509	0.0394	0.0399	null		0.521518	0.142438	0.145163	0.142734	0.0382826	0.00986404
MRPL42	146	5	0	146	0.008779	0.006528	0.3119	0.6194	0.2035	null		0.469261	0.154773	0.131205	0.177314	0.053261	0.0141863
MRPL43	152	3	0	152	0.001658	0.002518	0.0743	0.0624	0.0622	null		0.501153	0.142112	0.158746	0.142076	0.0395756	0.0163379
MRPL44	331	4	4	327	0.006159	0.002905	0.253	0.2382	0.0847	null		0.307801	0.283865	0.173858	0.101371	0.0930392	0.0400662
MRPL45	300	8	10	290	0.0146025	0.010839	0.1049	0.1993	0.2862	P↑	2.6641	0.127271	0.129559	0.482203	0.0857578	0.112235	0.0629748
MRPL46	231	4	0	231	0.005461	0.005937	0.1963	0.1062	0.2292	null		0.43158	0.140369	0.134543	0.198626	0.0622854	0.0325976
MRPL47	244	7	2	242	0.003182	0.007401	0.2042	0.1086	0.2499	null		0.428181	0.144302	0.157065	0.187866	0.0606514	0.0219348
MRPL48	212	8	1	211	0.0054625	0.009901	0.1748	0.2106	0.315	null		0.306686	0.12786	0.306321	0.0956799	0.0395436	0.12391
MRPL49	157	4	3	154	0.0098265	0.00981	0.1082	0.1566	0.3322	null		0.395232	0.224861	0.161795	0.127341	0.0712598	0.0195112
MRPL50	171	2	11	160	0.008221	0.012548	0.2597	0.2358	0.3005	null		0.492088	0.143404	0.157738	0.141502	0.0405048	0.0247625
MRPL51	156	2	1	155	0.0074465	0.005323	0.0968	0.1278	0.0959	null		0.505352	0.143178	0.144446	0.151377	0.042043	0.0136037
MRPL53	109	3	0	109	0.007514	0.004292	0.1976	0.392	0.0936	null		0.498743	0.162099	0.122332	0.159013	0.0470007	0.0108117
MRPL54	121	3	0	121	0.0038715	0.012798	0.0694	0.0963	0.0908	null		0.506665	0.137586	0.170959	0.136207	0.0365128	0.0120699
MRPL55	116	3	9	107	0.013779	0.013376	0.1735	0.4344	0.1381	null		0.462888	0.11701	0.179325	0.15896	0.0388868	0.0429304
MRPL57	103	1	0	103	1e-06	2e-06	0.1074	0.0001	0.0001	P↓	0.164391	0.332295	0.121791	0.360762	0.121802	0.0449946	0.0183551
MRPL58	199	6	0	199	0.008296	0.00433	0.1588	0.2811	0.1449	null		0.443335	0.136266	0.148989	0.191181	0.0573298	0.0228996
P) Nuclear-encoded aminoacyl-tRNA synthetase genes, which interact with mtDNA-encoded tRNAs.
					dN		dN/dS					model weights
gene	cds	exons*	gaps	N	Vidua	Aimb	outgroup	Vidua	Aimb	best	∆AICc	null	A	P	V	VA	VAp
tRNA synthetases	13107	290	112	12995	0.0045185	0.005251	0.1818	0.1874	0.2097	null		0.288849	0.227115	0.241294	0.107636	0.0867096	0.0483965
AARS2	986	22	0	986	0.007192	0.004828	0.168	0.3718	0.1338	V↑	3.31943	0.0962432	0.0466685	0.0663945	0.506029	0.210291	0.0743736
CARS2	592	15	13	579	0.006123	0.00337	0.2765	0.5073	0.1551	null		0.318156	0.170214	0.111218	0.226213	0.116596	0.0576042
DARS2	626	17	2	624	0.005125	0.004513	0.2197	0.2267	0.1842	null		0.446472	0.164251	0.156412	0.156128	0.0570023	0.0197345
EARS2	540	9	28	512	0.009967	0.006176	0.186	0.1611	0.2023	null		0.436033	0.152132	0.168766	0.162318	0.0560956	0.0246553
FARS2	454	6	1	453	0.0033265	1e-06	0.1325	0.1818	0.0001	A↓	0.224852	0.250055	0.279808	0.124495	0.094809	0.105683	0.145151
GARS1	712	17	1	711	0.0010005	2e-06	0.0494	0.0656	0.0001	A↓	1.13328	0.177112	0.312132	0.0620053	0.0713577	0.114914	0.262479
GATB	554	13	0	554	0.003027	0.005998	0.2439	0.1703	0.2141	null		0.321517	0.112493	0.134826	0.128045	0.0453836	0.257736
GATC	125	4	1	124	1e-06	0.026509	0.2762	0.0001	999	A↑	8.04879	0.0107576	0.601852	0.0508701	0.00580897	0.265112	0.0655997	excluded length-variable portion of exon 1 (range of 13-47 codons across species)
HARS1	501	13	0	501	0.003127	0.000842	0.0417	0.0986	0.0258	null		0.29713	0.124588	0.113055	0.284697	0.108079	0.0724525
IARS2	994	23	4	990	0.0023065	0.007363	0.1691	0.098	0.2221	null		0.304551	0.165375	0.10849	0.249103	0.116887	0.0555934
KARS1	595	14	0	595	0.004275	0.003094	0.0906	0.1699	0.1175	null		0.363548	0.129192	0.152925	0.213421	0.0797941	0.0611194
LARS2	904	20	1	903	0.0040895	0.004841	0.1885	0.1694	0.2471	null		0.419931	0.17928	0.153829	0.156922	0.0654848	0.0245528
MARS2	579	3	1	578	0.0072255	0.004364	0.1041	0.1328	0.1386	null		0.402577	0.15343	0.195473	0.161358	0.062921	0.0242423
NARS2	473	14	3	470	2.5e-06	0.006007	0.1657	0.0001	0.3987	V↓	7.22879	0.0105009	0.0133089	0.00359152	0.389886	0.329437	0.253276
PARS2	471	1	1	470	0.0072515	0.008411	0.0868	0.1863	0.568	P↑	6.67376	0.013437	0.229894	0.377999	0.0146782	0.262341	0.101651
QRSL1 (GATA)	524	11	2	522	0.0037115	0.005084	0.2191	0.264	0.2275	null		0.437418	0.150381	0.176859	0.157101	0.0538454	0.0243957
RARS2	579	20	0	579	0.0058245	0.006543	0.179	0.4415	0.4456	P↑	2.88321	0.100478	0.100085	0.424769	0.133097	0.179788	0.0617835
SARS2	554	16	45	509	0.0035425	0.007815	0.0829	0.0518	0.1315	null		0.282823	0.164879	0.109438	0.155955	0.0874288	0.199477
TARS2	701	18	4	697	0.00578	0.005234	0.0738	0.1109	0.0973	null		0.348812	0.136685	0.144925	0.17592	0.0733262	0.120333
VARS2	807	23	1	806	0.0003815	0.006323	0.1272	0.0116	0.1099	V↓	5.40423	0.0398337	0.0182871	0.041252	0.593971	0.224007	0.0826493	excluded last coding exon from analysis; variable length and uncertain homology among taxa
WARS2	348	6	0	348	0.0071695	0.002841	0.2085	0.4077	0.163	null		0.281842	0.100682	0.278787	0.171052	0.0586001	0.109036
YARS2	488	5	4	484	0.002816	0.008409	0.1524	0.1138	0.5181	A↑	2.79706	0.0920219	0.37262	0.099488	0.0446765	0.141707	0.249487
Q) Compex I assembly proteins.
					dN		dN/dS					model weights
gene	cds	exons*	gaps	N	Vidua	Aimb	outgroup	Vidua	Aimb	best	∆AICc	null	A	P	V	VA	VAp
Complex I assembly	2040	49	54	1986	0.0073365	0.008759	0.2727	0.3162	0.3681	P↑	1.87849	0.151357	0.0999446	0.387178	0.06139	0.249638	0.0504922
NDUFAF1	301	4	0	301	0.0093725	0.010755	0.3844	0.2462	0.2269	null		0.416284	0.188469	0.157637	0.163692	0.0543834	0.0195347
NDUFAF2	171	4	0	171	0.0135005	0.008771	0.3051	0.6433	0.9731	P↑	0.565248	0.267213	0.113105	0.354486	0.118899	0.117451	0.0288453
NDUFAF3	171	5	7	164	0.0036605	0.007388	0.1156	0.3072	0.2076	null		0.399486	0.132243	0.210095	0.178247	0.0625438	0.0173848
NDUFAF4	179	3	0	179	0.005426	0.002595	0.3357	0.5653	0.0524	A↓	1.72338	0.210606	0.498536	0.0771682	0.0862475	0.0619406	0.0655014
NDUFAF5	352	11	13	339	0.003294	0.013584	0.2043	0.1018	0.7634	A↑	3.41824	0.0995872	0.550129	0.0419921	0.0790863	0.142132	0.0870733
NDUFAF6	324	9	7	317	0.0068815	0.007248	0.165	0.1858	0.4966	V↑A↑↑	2.34628	0.136097	0.124539	0.225239	0.0445506	0.439882	0.0296923
NDUFAF7	472	10	27	445	0.0063565	0.007944	0.3875	0.49	0.6367	null		0.374628	0.168966	0.21504	0.134999	0.0814102	0.0249567	first coding exon in Apho, Mate spans first two coding exons and first intron in other species
NDUFAF8	70	3	0	70	0.017005	0.005592	0.0845	0.2104	0.1364	null		0.591968	0.103432	0.139866	0.137843	0.0233746	0.00351675
R) Complex IV assembly proteins.
					dN		dN/dS					model weights
gene	cds	exons*	gaps	N	Vidua	Aimb	outgroup	Vidua	Aimb	best	∆AICc	null	A	P	V	VA	VAp
Complex IV assembly	2750	59	46	2704	0.0071735	0.00639	0.237	0.308	0.2376	null		0.269535	0.0983788	0.0979432	0.209142	0.075916	0.249085
COA1	139	4	0	139	0.0264925	2e-06	0.4029	0.7763	0.0001	A↓	0.255507	0.273925	0.311254	0.0863578	0.14923	0.142132	0.0371008	early stop codon in Vcha, Vmac shortens gene by 31 codons; analyzed full sequence excluding one codon
COA3	101	2	0	101	0.003934	0.011432	0.0695	121.731	0.421	P↑	2.09561	0.167688	0.128208	0.478142	0.107965	0.0856091	0.0323886
COA4	84	1	6	78	0.020408	0.008578	0.156	0.1414	0.3425	null		0.607284	0.128664	0.11776	0.118144	0.0237388	0.00440867
COA5	75	3	0	75	4e-06	4e-06	0.1159	64.7598	0.0001	null		0.481017	0.161394	0.232716	0.0897614	0.0283645	0.0067475
COA6	79	2	0	79	0.0070325	0.005335	0.4981	0.6712	0.1255	null		0.461877	0.163073	0.22351	0.0970885	0.0308317	0.0236193
COA7	231	3	0	231	0.0030125	0.003944	0.1813	0.1563	0.1844	null		0.477001	0.148812	0.155219	0.150654	0.0464583	0.0218559
COA8	200	5	18	182	0.0046105	1e-06	0.5966	999	0.0001	null		0.299332	0.164833	0.110717	0.220864	0.121492	0.0827614
COX10	454	7	0	454	0.006225	0.010768	0.3404	0.2005	0.723	null		0.251354	0.249251	0.0889835	0.184385	0.149616	0.0764106
COX11	233	4	0	233	0.009539	0.013719	0.1522	0.5394	2.2946	V↑A↑↑	6.06951	0.0167544	0.22093	0.25217	0.0137187	0.348422	0.148005
COX14	52	1	0	52	1.3e-05	1.6e-05	0.0492	0.0001	0.0001	null		0.535091	0.108886	0.226392	0.106604	0.0212981	0.00172852
COX15	403	8	10	393	0.0020855	0.003758	0.1597	0.063	0.1141	null		0.312467	0.115373	0.227898	0.22893	0.0854878	0.0298429
COX16	105	4	0	105	0.0327135	0.004389	0.2209	1.0002	0.1787	V↑	1.08983	0.232329	0.0649495	0.18348	0.400642	0.0942942	0.024305
COX17	67	2	0	67	0	3e-06	0.391	0.0001	0.0001	P↓	0.56258	0.331394	0.143693	0.439043	0.0545111	0.0219248	0.00943465
COX18	317	6	12	305	0.008774	0.011776	0.1509	0.9604	0.1815	V↑	3.30559	0.0915987	0.0303569	0.0355085	0.478288	0.165663	0.198585
COX19	93	3	0	93	3e-06	0.004225	0.1947	0.0001	0.0877	null		0.36237	0.0886009	0.187461	0.275739	0.0712164	0.0146127
COX20	117	4	0	117	1e-06	1e-06	0.4091	0.0001	0.0001	P↓	0.186608	0.288698	0.148413	0.316931	0.148967	0.078224	0.0187664
S) Coenzyme Q10 assembly proteins.
					dN		dN/dS					model weights
gene	cds	exons*	gaps	N	Vidua	Aimb	outgroup	Vidua	Aimb	best	∆AICc	null	A	P	V	VA	VAp
Co Q10 assembly	4127	97	57	4070	0.004644	0.006049	0.2173	0.214	0.2383	null		0.421892	0.172706	0.163075	0.15515	0.0631784	0.0239983
COQ2	357	7	12	345	0.0009925	0.012491	0.2738	0.0314	0.3039	A↑V↓	5.04898	0.036476	0.0136701	0.0129795	0.360464	0.121024	0.455386
COQ3	363	7	9	354	0.010159	0.010914	0.5572	0.6515	0.3424	null		0.402934	0.210688	0.14475	0.145818	0.0721816	0.0236286	early stop codon in Aimb shortens gene by 31 codons; analyzed full sequence excluding stop codon and later codon with frameshift mutation
COQ4	204	6	0	204	0.003841	0.002135	0.1356	0.1806	0.0694	null		0.463319	0.172785	0.143272	0.150495	0.0540986	0.0160304	used shorter annotation at 5' end due to frameshift mutation in Lstr and lack of alternative start codon in Scan
COQ5	315	7	6	309	0.0037915	0.008754	0.2224	0.1782	0.4101	null		0.400743	0.210551	0.132158	0.147615	0.0719611	0.0369713
COQ6	474	12	10	464	0.002894	0.005466	0.1775	0.0974	0.4384	null		0.307973	0.242576	0.106	0.168722	0.12936	0.045369
COQ7	222	6	11	211	0.009688	0.013286	0.3384	0.2361	0.3764	null		0.467537	0.144587	0.156858	0.163823	0.0501898	0.0170047
COQ8A	650	14	1	649	0.005854	0.00433	0.1036	0.252	0.1362	V↑	1.18429	0.189945	0.0679232	0.164001	0.343394	0.135721	0.099015
COQ9	315	9	1	314	0.0019695	0.001478	0.1819	0.1027	0.1762	null		0.43317	0.141643	0.142214	0.182149	0.0591222	0.0417017
COQ10A	227	5	6	221	0.007435	0.003798	0.0575	0.376	0.0675	V↑	2.5605	0.137826	0.0436011	0.0549001	0.495835	0.153485	0.114352
COQ10B	221	5	0	221	0.0047705	3e-06	0.2737	0.9714	0.0001	A↓	2.89912	0.105452	0.449359	0.0344822	0.0729307	0.257813	0.079963
PDSS1	402	11	0	402	0.002044	0.001193	0.1784	0.167	0.0449	null		0.308916	0.284008	0.176071	0.104224	0.0951556	0.0316252
PDSS2	377	8	1	376	0.0026545	0.008349	0.1152	0.0896	0.2974	A↑	0.469531	0.266481	0.336995	0.112755	0.112495	0.118882	0.0523915
T) Control set of 102 autosomal genes.
					dN		dN/dS					model weights
gene	cds	exons*	gaps	N	Vidua	Aimb	outgroup	Vidua	Aimb	best	∆AICc	null	A	P	V	VA	VAp
102A	70764	1249	450	70314	0.0032605	0.003411	0.1529	0.1505	0.1637	null		0.336688	0.254787	0.139335	0.134762	0.0982871	0.036141
ABCC3	1529	31	0	1529	0.0030895	0.003419	0.1303	0.1509	0.1275	null		0.423866	0.153279	0.154818	0.165688	0.0596098	0.0427394
ACER3	267	11	0	267	0.0016265	0.001858	0.016	0.1522	0.2283	P↑	1.35081	0.193564	0.149751	0.38032	0.113546	0.123943	0.0388767
ACTR1A	376	11	0	376	2e-06	2e-06	0.0001	0.0001	0.0001	null		0.465372	0.155361	0.155361	0.155361	0.0515481	0.0169978
AFAP1L1	770	19	0	770	0.001193	0.002479	0.071	0.0304	0.0497	null		0.242611	0.101081	0.128597	0.225452	0.097822	0.204438
ANGPTL4	473	7	6	467	0.007684	3e-06	0.1488	0.2208	0.0001	V↑A↓	6.01002	0.0248815	0.299681	0.0123007	0.0151444	0.145724	0.502268
ANTXR2	479	17	1	478	0.0034945	0.003735	0.1726	0.2265	0.1743	null		0.446726	0.152522	0.153917	0.168734	0.057314	0.0207867
APOA4	367	3	0	367	0.0072385	0.005144	0.085	0.1446	0.1068	null		0.401758	0.139869	0.134089	0.197182	0.0688451	0.0582573
BTBD3	521	4	3	518	0.000752	1e-06	0.0075	0.0339	0.0001	null		0.36427	0.145386	0.130788	0.231587	0.0885435	0.0394263
C1QTNF8	258	2	4	254	0.0052195	0.003106	0.0996	0.0806	0.0385	null		0.344599	0.219885	0.222635	0.111865	0.0724681	0.0285487
CALM1	149	6	0	149	2.5e-06	1e-06	0.0001	0.0001	0.0001	null		0.51676	0.14436	0.14436	0.14436	0.0395441	0.0106169
CARF	712	13	11	701	0.008667	0.009574	0.3029	0.4233	0.3257	null		0.389288	0.136525	0.181029	0.197891	0.0701873	0.0250789
CDC42BPB	1749	39	1	1748	0.0005635	0.000799	0.0598	0.0367	0.0351	P↓	0.09591	0.286516	0.140575	0.300591	0.131959	0.069974	0.0703838
CEP164	1467	31	67	1400	0.013127	0.010085	0.3335	0.4087	0.2982	null		0.350174	0.139316	0.167096	0.187306	0.0729063	0.0832006
CEP170	1663	19	0	1663	0.0025145	0.004351	0.1256	0.1223	0.2231	A↑	0.557486	0.248521	0.328412	0.105343	0.091718	0.118471	0.107535
CREB3L2	521	12	0	521	0.003331	0.005611	0.1137	0.1324	0.2988	A↑	0.258555	0.244064	0.277746	0.23595	0.0838483	0.0978164	0.0605758
DAZAP2	163	4	9	154	0.027243	0.012745	0.2662	0.4067	0.1597	null		0.409095	0.164562	0.133506	0.168387	0.0637505	0.0606994
DCAF4	508	13	1	507	0.002754	0.003436	0.3012	0.1386	0.1926	P↓	0.217862	0.268311	0.106947	0.29919	0.191563	0.0819556	0.0520334
DNMT1	1517	34	11	1506	0.001063	0.002093	0.0277	0.0253	0.0365	null		0.30855	0.135456	0.271873	0.114104	0.0495968	0.120419
ECHDC3	292	5	2	290	0.002619	0.00322	0.1686	0.1289	0.389	null		0.40688	0.184581	0.142148	0.141992	0.0622041	0.0621951
ECT2	986	24	4	982	0.004372	0.002439	0.1694	0.2066	0.1571	null		0.417189	0.150347	0.174887	0.169542	0.0605966	0.0274391
FLT3LG	216	7	4	212	0.005893	0.013979	0.2717	0.1225	0.596	null		0.326424	0.187546	0.10486	0.204945	0.110222	0.066004
FOXK1	657	9	0	657	0.000504	1e-06	0.0755	0.0516	0.0001	null		0.338038	0.202869	0.2137	0.124538	0.075072	0.0457835
FRMD8	464	10	7	457	0.0012785	0.003388	0.083	0.029	0.0624	null		0.289668	0.102848	0.224935	0.253113	0.0944228	0.0350141
GBX2	344	2	6	338	1.5e-06	0.002295	0.0465	0.0001	0.1636	null		0.32177	0.219989	0.113247	0.179167	0.116938	0.0488895
HESX1	214	4	0	214	0.005149	0.006281	0.2585	0.119	0.2736	null		0.399784	0.126297	0.15809	0.226369	0.0688306	0.0206297
HTR1B	377	1	0	377	3.5e-06	0.001145	0.0182	0.0001	0.0927	null		0.287781	0.220069	0.0962795	0.218879	0.13309	0.0439013
IFFO2	498	9	4	494	0.0009	2e-06	0.0245	0.0243	0.0001	null		0.402118	0.214497	0.145305	0.137951	0.0731457	0.0269832
IGFBP5	269	4	0	269	2e-06	6e-06	0.0112	0.0001	0.0001	null		0.37981	0.177139	0.221364	0.135515	0.0641326	0.0220393
INTS8	995	27	1	994	0.001291	0.000481	0.0328	0.0593	0.0167	null		0.350442	0.172858	0.145925	0.190336	0.0854725	0.0549674
IRX2	478	4	2	476	0.0005535	0.000888	0.0942	0.0222	0.0404	P↓	0.239093	0.252123	0.0996922	0.284139	0.224339	0.104419	0.0352871
ISL1	349	6	0	349	1e-06	1e-06	0.0001	0.0001	0.0001	null		0.467737	0.15489	0.15489	0.15489	0.0509487	0.0166452
JMJD7	317	8	0	317	0.003628	0.00297	0.127	0.2286	0.0848	null		0.411309	0.160667	0.1363	0.185325	0.0682298	0.0381697
KCNT1	1262	32	6	1256	3e-06	3e-06	0.0066	0.0001	0.0001	P↓	2.95116	0.123919	0.0825468	0.541967	0.107345	0.0751648	0.0690572
KNDC1	1914	30	6	1908	0.01096	0.010726	0.4149	0.5715	0.4661	null		0.295477	0.109462	0.230918	0.233924	0.0934927	0.0367268
KRT20	436	8	1	435	0.0043825	0.005109	0.3437	0.1954	0.1447	P↓	1.77758	0.167925	0.170306	0.408424	0.0827402	0.0928299	0.0777759
LONRF2	784	12	0	784	0.002293	0.002899	0.0773	0.2162	0.3059	P↑	3.858	0.0724935	0.128795	0.498945	0.0715033	0.159588	0.0686753
LRATD2	298	1	3	295	0.002147	0.004314	0.0675	0.0658	0.1317	null		0.425175	0.194929	0.156921	0.140236	0.0627178	0.0200205
LRP4	1914	38	0	1914	0.00124	0.00095	0.068	0.0498	0.0563	null		0.406907	0.152057	0.151118	0.18226	0.0693366	0.0383221
LRRC30	342	1	0	342	0.002852	0.005456	0.098	0.1529	0.1618	null		0.412874	0.171048	0.157186	0.15424	0.0665287	0.0381233
LRRC70	632	1	4	628	0.0094805	0.009358	0.3024	0.3609	0.4098	null		0.397887	0.167796	0.198427	0.147051	0.0637404	0.0250986
LSM4	138	5	0	138	0	2e-06	0.0001	0.0001	0.0001	null		0.524356	0.142609	0.142609	0.142609	0.0379456	0.00987262
MAB21L2	359	1	0	359	4e-06	1e-05	0.0001	0.0001	0.0001	null		0.466818	0.155074	0.155074	0.155074	0.0511815	0.0167799
MAGI3	1456	21	8	1448	0.004987	0.004834	0.3221	0.212	0.3342	null		0.306893	0.112685	0.183334	0.264669	0.0953742	0.0370444
MAP3K4	1581	27	9	1572	0.0013055	0.001189	0.1032	0.0623	0.058	P↓	1.34161	0.224057	0.124732	0.438215	0.129922	0.0830657	8.18958e-06
MAP3K7	644	18	0	644	0.0009195	0.000707	0.0119	0.0864	0.0861	P↑	1.38197	0.164138	0.0973113	0.327567	0.191183	0.160378	0.0594221
MPPED1	302	6	0	302	2.5e-06	0	0.0001	0.0001	0.0001	null		0.472947	0.153839	0.153839	0.153839	0.0496446	0.0158919
MRM2	237	3	3	234	0.0033515	0.007744	0.2215	0.1003	0.498	null		0.264548	0.145446	0.1369	0.147886	0.0745775	0.230643	Aimb has 3 extra codons at 3' end of gene due to point mutation
NPR1	1068	21	16	1052	0.0025675	0.001828	0.0528	0.0198	0.0633	V↓	5.80797	0.0220288	0.00848388	0.278022	0.401955	0.149186	0.140325
NPTN	396	8	0	396	1e-06	0.001044	0.0673	0.0001	0.0755	V↓	0.321111	0.283865	0.0973297	0.136744	0.333304	0.111704	0.0370537
NTN3	588	6	1	587	0.0031255	0.001365	0.0146	0.039	0.0196	P↑	0.329001	0.235674	0.0820898	0.277814	0.26277	0.0962173	0.0454348
NTPCR	192	5	0	192	0.008137	0.009785	0.1744	0.2899	0.5158	null		0.369708	0.204111	0.213321	0.117577	0.0737753	0.0215079
NUDC	353	9	17	336	0.0032205	0.003744	0.0598	0.1418	0.2159	P↑	3.29698	0.113622	0.0999097	0.590736	0.064856	0.0545035	0.0763734
NUDT4	181	5	0	181	1.5e-06	1e-06	0.0208	0.0001	0.0001	null		0.449857	0.146498	0.183792	0.15421	0.0502974	0.015346
OSR2	311	3	0	311	0.001214	1e-06	0.0001	0.0498	0.0001	V↑	0.968365	0.203933	0.070963	0.252425	0.330952	0.107244	0.0344829
PANK3	374	7	0	374	2.5e-06	1e-06	0.033	0.0001	0.0001	null		0.33893	0.136876	0.113087	0.23552	0.0998993	0.075688
PDXK	312	11	0	312	1e-06	0.001526	0.0302	0.0001	0.0491	null		0.418043	0.154028	0.136572	0.199791	0.069279	0.0222867
PKD1	4355	46	25	4330	0.003683	0.00477	0.1243	0.1323	0.1576	null		0.302661	0.213897	0.244595	0.11386	0.081946	0.0430417
PLBD1	546	11	2	544	0.005782	0.004874	0.1299	0.2636	0.2769	null		0.256607	0.155788	0.197304	0.171777	0.120788	0.0977368
PMEPA1	307	5	5	302	5e-07	1e-06	0.027	0.0001	0.0001	null		0.370772	0.152921	0.25822	0.13544	0.055971	0.0266759
POLQ	2589	30	25	2564	0.011313	0.009398	0.3567	0.5475	0.4797	P↑	4.28175	0.0606226	0.0385655	0.515708	0.166545	0.142026	0.076532
POT1	779	19	5	774	0.0046675	0.00768	0.3954	0.1992	0.4547	V↓	0.735376	0.243902	0.0949975	0.112053	0.352289	0.129272	0.0674863
PROM2	833	23	9	824	0.005746	0.001425	0.1151	0.0879	0.045	null		0.270671	0.260705	0.111988	0.124361	0.126439	0.105837
PRRC1	455	8	27	428	0.00766	0.022773	0.3677	0.1908	1.5003	A↑	8.56741	0.00591289	0.428735	0.00286379	0.0163718	0.408816	0.1373
PSD	1103	16	4	1099	0.0037985	0.003596	0.1212	0.1672	0.0917	null		0.363203	0.176716	0.134804	0.19999	0.0896467	0.0356406
PTPN3	932	26	0	932	0.001286	0.002446	0.0946	0.0671	0.1098	null		0.415397	0.156611	0.153313	0.181429	0.0663634	0.0268868
RAB3A	220	4	0	220	4e-06	9e-06	0.0025	0.0001	0.0001	null		0.457612	0.158321	0.168182	0.149063	0.0513364	0.0154854
RFTN2	507	9	0	507	0.0009185	0.008765	0.2059	0.0588	0.4758	A↑	0.341664	0.20689	0.245432	0.0786774	0.177056	0.190783	0.101161
RLIM	595	3	0	595	0.000614	0.00068	0.0852	0.0298	0.0403	null		0.321926	0.144001	0.190653	0.216027	0.0935168	0.0338768
RNF11	154	3	0	154	1e-06	0	0.0001	0.0001	0.0001	null		0.513724	0.145051	0.145051	0.145051	0.0401954	0.0109271
RNFT2	448	9	0	448	0.000674	0.000933	0.0511	0.0287	0.0331	null		0.394436	0.14342	0.21633	0.154304	0.0567228	0.0347869
S100A16	110	3	0	110	0.0023725	0	0.0001	0.0231	0.0001	V↑	0.409334	0.255623	0.0629494	0.275516	0.31368	0.0749048	0.0173265
SCN8A	1980	26	3	1977	0.0005035	0.000245	0.0129	0.0159	0.0083	null		0.41818	0.166557	0.157749	0.158014	0.0631648	0.0363351
SDC2	201	5	0	201	0.007516	0.00498	0.2624	999	0.4632	V↑	3.84371	0.0765278	0.0244343	0.14469	0.522962	0.178654	0.0527322
SEC61G	68	3	0	68	1e-06	2e-06	0.0001	0.0001	0.0001	null		0.652571	0.109317	0.109317	0.109317	0.0170246	0.00245367
SLC5A1	647	15	0	647	0.002116	0.00094	0.1189	0.0896	0.047	null		0.373545	0.210083	0.159823	0.145182	0.0819832	0.0293837
SLC6A6	687	17	0	687	1e-06	0.000697	0.0001	0.0001	0.0727	A↑	2.50992	0.12329	0.432463	0.194178	0.047115	0.150644	0.0523096
SLCO2B1	664	14	7	657	0.004472	0.003529	0.1009	0.1041	0.0448	A↓	0.733032	0.203581	0.293706	0.254925	0.0713796	0.102243	0.0741655
SMG9	495	13	10	485	0.001634	0.003134	0.0271	0.0243	0.0489	null		0.403044	0.205389	0.15279	0.140658	0.0705475	0.0275721
SNX10	201	6	0	201	4e-06	0.002257	0.0766	0.0001	0.1268	null		0.320149	0.111626	0.11823	0.317475	0.102322	0.0301968
SOCS7	602	9	27	575	0.0004715	0.001357	0.107	0.0276	0.0554	P↓	0.782053	0.224233	0.105312	0.331529	0.211816	0.103995	0.0231145
SOX9	492	3	27	465	0.0013985	5e-06	0.0209	0.0386	0.0001	null		0.284749	0.283606	0.114275	0.123548	0.118474	0.0753491
SP3	773	7	2	771	1.5e-06	0.000617	0.0309	0.0001	0.0263	null		0.33893	0.119136	0.163132	0.273414	0.0968023	0.00858569
SPATA6	470	13	7	463	0.00558	0.006731	0.7313	0.3722	0.5633	P↓	0.087966	0.282116	0.100928	0.294801	0.206982	0.0759188	0.0392535
SRRM1	903	18	6	897	0.0004085	1e-06	0.0557	0.0147	0.0001	null		0.195885	0.173067	0.183751	0.183857	0.188366	0.0750744
STIM1	828	13	8	820	0.0007505	2e-06	0.0773	0.0567	37.7684	null		0.382395	0.134786	0.226753	0.144555	0.0508258	0.0606846
STX8	236	8	0	236	0.002093	0.008553	0.0855	0.0815	0.1624	null		0.301024	0.145433	0.256363	0.0946828	0.0450827	0.157415
SWAP70	586	12	0	586	0.000548	0.000744	0.044	0.0286	0.0302	null		0.43636	0.159013	0.16165	0.162548	0.0597611	0.0206677
TCF3	673	18	0	673	0.001065	2e-06	0.0662	0.0627	0.0001	A↓	1.26109	0.193001	0.362577	0.162932	0.0675687	0.126414	0.0875077
THOC2	1608	39	0	1608	2e-06	0.000555	0.0332	0.0001	0.0268	V↓	2.01264	0.164761	0.0595665	0.088191	0.450705	0.168477	0.0683004
TMC5	834	21	17	817	0.00551	0.007294	0.641	0.3275	0.3408	P↓	3.15895	0.101696	0.10038	0.493471	0.115345	0.127511	0.0615969	used gene annotation from Melospiza melodia, which implied a functional protein in all species
TMEM106B	275	7	0	275	5.5e-06	1e-06	0.0117	0.0001	0.0001	null		0.400672	0.136163	0.203077	0.178255	0.0614625	0.0203698
TMEM179	232	4	0	232	1e-06	1e-06	0.0001	0.0001	0.5667	null		0.547154	0.132011	0.13201	0.13201	0.040738	0.016077
TMEM80	142	5	0	142	0.0031615	2e-06	0.2664	0.1642	0.0001	null		0.326244	0.295468	0.174121	0.0946867	0.0866528	0.0228275
TMPRSS9	1076	18	1	1075	0.006413	0.006524	0.1824	0.2673	0.3021	P↑	1.27116	0.204502	0.149186	0.386124	0.114312	0.0921649	0.0537105
TPM4	284	9	0	284	0	3e-06	0.0001	0.0001	0.0001	null		0.47544	0.15333	0.15333	0.15333	0.0490285	0.0155424
TSHZ3	1079	2	0	1079	0.0003495	0.000906	0.0461	0.0315	0.0654	null		0.425658	0.168144	0.151907	0.165373	0.063892	0.0250255
USF3	2262	6	8	2254	0.0058575	0.003927	0.1823	0.2218	0.1737	null		0.387061	0.144211	0.165848	0.201705	0.0739395	0.0272349
UTP18	532	13	0	532	0.0046105	0.015862	0.4073	0.1913	0.4183	null		0.313479	0.109077	0.133213	0.302973	0.104032	0.0372259
VPS53	832	22	0	832	0.000395	0.000542	0.0263	0.0269	0.0465	null		0.423053	0.16713	0.177355	0.149244	0.0588072	0.0244108
WNT11	354	5	0	354	0.0039625	0.001292	0.0195	0.2151	0.0437	V↑	4.01767	0.0649777	0.0216794	0.171335	0.484385	0.191012	0.0666108
ZDHHC7	307	6	0	307	2e-06	1e-06	0.0182	0.0001	0.0001	null		0.39165	0.148065	0.219158	0.158068	0.0603078	0.0227503
ZFP36L2	489	2	7	482	0.0019365	6e-06	0.0021	0.0215	0.0001	V↑	2.91051	0.110666	0.058628	0.100496	0.474267	0.185282	0.0706609
U) Subunits of the vacuolar-type (V-type) ATPase (not expressed in mitochondria).
					dN		dN/dS					model weights
gene	cds	exons*	gaps	N	Vidua	Aimb	outgroup	Vidua	Aimb	best	∆AICc	null	A	P	V	VA	VAp
V-type ATPase	9490	246	20	9470	0.002037	0.001915	0.0995	0.0837	0.0865	null		0.289672	0.132065	0.280673	0.17487	0.0835177	0.0392024	ATP6V1E2, ATP6V1G2: not in birds
ATP6AP1	460	10	8	452	0.01217	0.010034	0.387	0.4835	0.3591	null		0.30494	0.10521	0.161576	0.116701	0.0398826	0.271691
ATP6AP1L	349	7	8	341	0.018307	0.016104	0.3712	0.401	0.7135	null		0.381843	0.235467	0.131047	0.127742	0.0784352	0.0454655
ATP6AP2	360	9	0	360	0.0011	3e-06	0.1113	0.067	0.0001	A↓	1.70461	0.173997	0.408029	0.127278	0.084016	0.14943	0.0572505
ATP6V0A1	868	22	0	868	2e-06	2e-06	0.0046	0.0001	0.0001	null		0.369503	0.151106	0.21727	0.166053	0.0691426	0.0269243
ATP6V0A2	849	20	0	849	0.0026195	0.002758	0.1642	0.0568	0.1712	V↓	4.00805	0.0673681	0.0258314	0.159627	0.499793	0.176432	0.0709477
ATP6V0A4	844	20	3	841	0.001425	0.00168	0.1345	0.058	0.0689	P↓	1.53625	0.182795	0.100858	0.394056	0.151165	0.094855	0.0762704
ATP6V0B	204	8	0	204	2.5e-06	1e-06	0.0263	0.0001	0.0001	null		0.402599	0.129488	0.214682	0.177213	0.0569293	0.0190888
ATP6V0C	154	3	0	154	2.5e-06	1e-06	0.0001	0.0001	0.0001	null		0.513724	0.145051	0.145051	0.145051	0.0401954	0.0109273
ATP6V0D1	351	8	0	351	4.5e-06	3e-06	0.0056	0.0001	0.0001	null		0.415305	0.149667	0.189543	0.164945	0.0601411	0.0203992
ATP6V0D2	351	8	0	351	0.003268	2e-06	0.045	0.1311	0.0001	null		0.281519	0.179213	0.116076	0.24054	0.133086	0.0495657
ATP6V0E1	81	3	0	81	1e-06	1e-06	0.0001	0.0001	0.3613	null		0.607381	0.121757	0.121755	0.121755	0.0231741	0.00417728
ATP6V0E2	81	3	0	81	1.15e-05	1.7e-05	0.0067	0.0001	0.0001	null		0.545865	0.13038	0.159189	0.128806	0.0302984	0.00546152
ATP6V1A	617	14	0	617	2.5e-06	0.000783	0.0152	0.0001	0.0393	null		0.358474	0.175889	0.124576	0.209619	0.0945999	0.0368413
ATP6V1B1	505	14	0	505	4e-06	0.000744	0.0112	0.0001	0.0038	null		0.288383	0.192389	0.247034	0.147643	0.0923933	0.0321585
ATP6V1B2	501	14	0	501	0.0005825	4e-06	0.0001	0.0513	0.0001	V↑	3.63123	0.0840239	0.0325603	0.131309	0.516313	0.17604	0.0597539
ATP6V1C1	382	12	0	382	2e-06	2e-06	0.0001	0.0001	0.0001	null		0.464895	0.155455	0.155455	0.155455	0.0516695	0.0170695
ATP6V1C2	392	13	0	392	0.0010675	0.001198	0.1065	0.0481	0.0975	null		0.371688	0.124632	0.231151	0.169395	0.0566275	0.0465063
ATP6V1D	247	9	0	247	5e-07	0.001917	0.0001	0.0001	0.0994	A↑	1.93043	0.150983	0.396382	0.238919	0.0516529	0.123794	0.0382689
ATP6V1E1	226	9	0	226	0	1e-06	0.0675	0.0001	0.4264	null		0.438365	0.136093	0.177307	0.177294	0.0544233	0.0165169
ATP6V1F	119	2	0	119	5e-06	2e-06	0.0001	0.0001	0.0001	null		0.54148	0.138555	0.138555	0.138555	0.0345005	0.00835274
ATP6V1G1	118	3	0	118	2e-06	5e-06	0.0001	1.0551	0.0001	null		0.542578	0.138297	0.138297	0.138281	0.0342862	0.00826254
ATP6V1G3	118	3	0	118	0.003015	2e-06	0.2936	0.0847	4.0728	null		0.462305	0.117793	0.127179	0.210456	0.052169	0.0300978
ATP6V1H	480	13	0	480	2e-06	2e-06	0.02	0.0001	0.0001	null		0.302007	0.135342	0.275718	0.173476	0.0817782	0.0316782
TCIRG1	833	19	1	832	0.0020575	0.0024	0.0468	0.0424	0.0531	null		0.408251	0.148393	0.174219	0.147819	0.053337	0.067981
V) P-type ATPase genes (not expressed in mitochondria).
					dN		dN/dS					model weights
gene	cds	exons*	gaps	N	Vidua	Aimb	outgroup	Vidua	Aimb	best	∆AICc	null	A	P	V	VA	VAp
P-type genes combined	40496	881	91	40405	0.0025845	0.002778	0.1112	0.1062	0.1029	P↓	0.714836	0.246079	0.140717	0.351803	0.105115	0.0626841	0.0936022
ATP1A1	1024	23	3	1021	0.0003535	2e-06	0.0307	0.0174	0.0001	A↓	0.339885	0.260063	0.308236	0.117608	0.1104	0.1285	0.0751915
ATP1A2	1033	23	0	1033	0.0005575	9e-06	0.006	0.0098	0.0001	null		0.366191	0.152419	0.226951	0.136135	0.0577943	0.0605095
ATP1A3	1025	23	0	1025	9.5e-06	1.9e-05	0.0013	0.0001	0.0001	P↓	0.247014	0.242792	0.155262	0.125421	0.123048	0.0787676	0.274709
ATP1B1	305	6	0	305	2.5e-06	1e-06	0.1176	0.0001	0.0001	P↓	4.67802	0.0532451	0.0421053	0.552205	0.160405	0.134826	0.0572134
ATP1B2	290	7	0	290	1e-06	1e-06	0.0442	0.0001	0.0001	P↓	1.49455	0.224673	0.10221	0.474339	0.103587	0.0467896	0.0484007
ATP1B3	289	8	0	289	0.0042875	0.000507	0.1359	0.2528	0.0148	null		0.330884	0.270021	0.109915	0.138537	0.113918	0.036726
ATP1B4	323	8	0	323	0.001869	0.00131	0.1872	0.0582	0.0281	P↓	3.52434	0.0788704	0.169783	0.459424	0.0604063	0.174942	0.0565737
ATP2A1	1004	22	1	1003	0.0010645	0.001483	0.0145	0.0114	0.0139	null		0.430896	0.153317	0.170361	0.164321	0.0584398	0.0226647
ATP2A2	1043	20	0	1043	2.5e-06	2e-06	0.0039	0.0001	0.0001	null		0.381471	0.159659	0.201492	0.162829	0.0691968	0.0253513
ATP2A3	1032	22	0	1032	0.002005	0.001572	0.0349	0.0383	0.1046	A↑	0.351956	0.226409	0.269973	0.0811098	0.080666	0.0975901	0.244252
ATP2B1	1273	21	0	1273	0.000291	2e-06	0.0033	0.02	0.0001	null		0.31507	0.146731	0.14102	0.253268	0.105205	0.0387066
ATP2B2	1245	21	0	1245	1.5e-06	2e-06	0.0001	0.0001	0.0001	null		0.445113	0.159244	0.159244	0.159244	0.0568758	0.0202797
ATP2B3	1206	20	38	1168	0.00289	0.001976	0.0687	0.0776	0.0427	null		0.367192	0.212659	0.13255	0.138659	0.0792838	0.0696559
ATP2B4	1245	22	1	1244	0.00028	3e-06	0.0287	0.0086	0.0001	P↓	4.54299	0.0519192	0.146303	0.503297	0.039102	0.12769	0.131689
ATP2C1	955	27	0	955	0.000461	0.000887	0.0523	0.0169	0.0428	null		0.320341	0.11542	0.205443	0.237637	0.0865458	0.034614
ATP2C2	943	27	0	943	0.0011175	0.001159	0.0831	0.0364	0.0518	null		0.288641	0.125484	0.207439	0.235959	0.103381	0.0390967
ATP4A	1010	23	1	1009	0.007668	0.00539	0.0576	0.0729	0.0669	null		0.360578	0.138138	0.22923	0.173889	0.066911	0.0312529
ATP4B	288	7	1	287	0.0014465	0.007778	0.2193	0.0457	0.256	V↓	0.759274	0.252186	0.0859043	0.128531	0.368634	0.12133	0.0434147
ATP7A	1497	22	0	1497	0.0033385	0.003374	0.1457	0.149	0.1267	null		0.410483	0.158686	0.175606	0.148302	0.057088	0.0498347
ATP7B	1530	21	3	1527	0.005869	0.005926	0.2656	0.279	0.3568	null		0.393222	0.202934	0.160404	0.141924	0.0739337	0.0275828
ATP8A1	1164	37	0	1164	1.5e-06	0.001202	0.0191	0.0001	0.0818	A↑	1.20638	0.171769	0.313984	0.0809268	0.123586	0.216304	0.0934292
ATP8A2	1189	37	0	1189	0.0008685	3.7e-05	0.0167	0.1168	0.0015	V↑	1.20392	0.207676	0.0804972	0.105414	0.379153	0.163169	0.0640912
ATP8B1	1252	27	2	1250	0.00213	0.005087	0.128	0.0893	0.1517	null		0.373099	0.157792	0.145551	0.206794	0.082772	0.0339925
ATP8B2	1192	27	1	1191	0.0013345	0.001438	0.0435	0.0362	0.0587	null		0.399189	0.159136	0.15707	0.151457	0.0602468	0.0729012
ATP8B3	1174	27	7	1167	0.0053535	0.007227	0.1406	0.0978	0.0911	P↓	0.55747	0.211961	0.186588	0.280098	0.131232	0.139661	0.0504601	excluded variable-length portion of last coding exon, trimmed to last conserved codon
ATP9A	1047	28	0	1047	3e-06	1e-06	0.0255	0.0001	0.0001	V↓	1.69752	0.142277	0.0890373	0.0537155	0.332465	0.218771	0.163734
ATP9B	1139	30	0	1139	0.001433	0.001231	0.0157	0.0774	0.0638	P↑	3.06151	0.0765586	0.0665836	0.353828	0.155153	0.241015	0.106863
ATP10A	1524	21	7	1517	0.002788	0.002757	0.1367	0.1464	0.2386	null		0.340187	0.245375	0.17014	0.122779	0.0894143	0.0321045
ATP10B	1469	22	16	1453	0.0063585	0.006471	0.3027	0.3234	0.2628	null		0.398484	0.159254	0.186839	0.147293	0.0585713	0.0495583
ATP10D	1426	22	1	1425	0.0067105	0.008835	0.338	0.5044	0.3839	null		0.337518	0.12684	0.171602	0.259135	0.101703	0.00320156
ATP11A	1202	30	0	1202	0.002633	0.000439	0.1747	0.137	0.0176	A↓	7.67575	0.0121844	0.565679	0.069758	0.00461793	0.236114	0.111647
ATP11B	1157	30	0	1157	0.0003185	0.001981	0.0142	0.0158	0.1195	A↑	6.38107	0.0249114	0.605382	0.0548352	0.010413	0.216623	0.0878361
ATP11C	1158	30	0	1158	0.0014915	0.002978	0.0376	0.0529	0.0842	A↑	0.577099	0.214688	0.286499	0.24558	0.0875622	0.12074	0.0449317
ATP12A	1035	23	0	1035	0.001335	0.001278	0.0432	0.0451	0.0336	null		0.43665	0.168642	0.155628	0.156505	0.0600217	0.0225541
ATP13A1	1169	26	1	1168	0.008845	0.00653	0.0662	0.0802	0.0632	null		0.411165	0.149072	0.161807	0.18646	0.067207	0.0242888
ATP13A2	1184	29	8	1176	0.0029075	0.00419	0.0921	0.0561	0.0554	P↓	4.41303	0.0668324	0.0558314	0.607106	0.0568921	0.054987	0.158351
ATP13A3	1253	32	0	1253	0.0031805	0.004429	0.1434	0.1551	0.4107	A↑	2.92295	0.100808	0.434716	0.0619283	0.0364543	0.158067	0.208027
ATP13A4	1202	30	0	1202	0.007013	0.006778	0.38	0.2823	0.2706	null		0.328195	0.172035	0.163251	0.161328	0.0936085	0.0815826
W) Neuro-related genes previously found to be accelerated in zebra finch relative to chicken (Nam et al. 2010)
					dN		dN/dS					model weights
gene	cds	exons*	gaps	N	Vidua	Aimb	outgroup	Vidua	Aimb	best	∆AICc	null	A	P	V	VA	VAp
59 neuro-related	61350	1039	180	61170	0.0024575	0.003094	0.1446	0.1242	0.1448	V↓	4.24903	0.0653054	0.024779	0.0520606	0.546531	0.200987	0.110337
ADGRV1	6237	92	4	6233	0.0067535	0.008627	0.2907	0.2898	0.284	null		0.406002	0.150661	0.159078	0.148544	0.0551184	0.0805967
ADIPOQ	246	2	1	245	0.0012175	0.001774	0.1255	0.0402	0.0349	null		0.260012	0.176605	0.124912	0.14147	0.107742	0.18926
AGA	352	9	0	352	0.0076705	0.002766	0.2485	0.2226	0.0909	null		0.348439	0.273014	0.129514	0.11581	0.0919383	0.0412852
ASPM	3469	29	9	3460	0.00881	0.009897	0.3876	0.443	0.2918	V↑A↓	1.21529	0.163429	0.261317	0.0602841	0.0893342	0.125565	0.300072
ATXN1	803	2	0	803	0.0009605	0.003003	0.0236	0.0415	0.0889	P↑	2.67405	0.109069	0.236324	0.415303	0.0394578	0.101688	0.0981573
CACNA1D	2199	50	0	2199	0.000518	0.000415	0.0309	0.035	0.0205	null		0.41003	0.17674	0.161821	0.153285	0.065118	0.0330057
CAMKK1	532	15	0	532	1.5e-06	2e-06	0.0877	0.0001	0.0001	P↓	2.62257	0.0747359	0.118104	0.269449	0.154342	0.27734	0.10603
CAPN2	700	21	0	700	0.0013355	0.002785	0.0718	0.0304	0.0924	null		0.300657	0.122003	0.145353	0.277081	0.104861	0.0500449
CREBBP	2462	31	2	2460	0.0004195	0.000745	0.0428	0.0361	0.057	null		0.418104	0.172761	0.15941	0.159407	0.065022	0.0252956
DHCR24	525	9	0	525	0.0025905	1e-06	0.1899	0.1416	0.0001	A↓	2.13512	0.141806	0.412411	0.14771	0.0512504	0.157024	0.0897996
DRD2	443	7	0	443	2.5e-06	1e-06	0.0434	0.0001	0.0001	null		0.288827	0.122101	0.154235	0.276655	0.118367	0.0398148
EPHB2	995	16	0	995	0.0006555	3e-06	0.0063	0.0114	0.0001	null		0.364799	0.204953	0.135924	0.172534	0.0899589	0.0318308
FGFR1	818	17	0	818	5e-06	0.0005	0.0334	0.0001	0.0189	V↓	4.22513	0.0624044	0.0244781	0.109576	0.516048	0.212861	0.0746322
FLI1	437	8	0	437	2e-06	0.000948	0.0329	0.0001	0.0265	null		0.315614	0.107421	0.209695	0.235006	0.0806991	0.0515661
GAN	597	11	0	597	1.5e-06	2e-06	0.0167	0.0001	0.0001	null		0.349731	0.162783	0.224194	0.15923	0.0774215	0.0266404
GFRA1	463	9	0	463	0.002494	0.002876	0.0541	0.2141	0.1066	P↑	0.96743	0.202676	0.0900093	0.328758	0.220147	0.110258	0.0481516
GNE	754	12	0	754	0.0015935	0.000626	0.014	0.0853	0.0311	V↑	2.03293	0.138388	0.0520407	0.191499	0.382422	0.164869	0.0707818
GRIA2	948	17	0	948	2.5e-06	2e-06	0.011	0.0001	0.0001	null		0.307823	0.150179	0.259707	0.163562	0.0862984	0.0324306
GRIN2A	1459	12	1	1458	0.001325	0.000823	0.0599	0.0738	0.0456	null		0.398749	0.15202	0.157589	0.152444	0.0585887	0.0806098
GRM1	1186	8	2	1184	0.001575	0.002317	0.0501	0.0445	0.0778	null		0.392634	0.209008	0.143729	0.149244	0.0764746	0.0289099
HTRA2	415	8	5	410	0.002789	0.001205	0.0377	0.0532	0.0327	null		0.399038	0.135519	0.211707	0.152544	0.0515346	0.049658
KIRREL3	780	17	0	780	0.0003435	4e-06	0.0047	0.0147	0.0001	null		0.354944	0.185527	0.124838	0.196322	0.0950026	0.0433666
KLHL1	746	11	1	745	0.0017865	0.001617	0.0727	0.1125	0.0639	V↑A↓	2.60174	0.156057	0.0569798	0.118396	0.0704564	0.0249925	0.573118
LEF1	412	11	0	412	1.5e-06	1e-06	0.036	0.0001	0.0001	null		0.319528	0.127549	0.25768	0.18757	0.0789134	0.0287599
LHX2	435	5	0	435	1e-06	1e-06	0.0741	0.0001	0.0001	null		0.322906	0.14794	0.245002	0.173996	0.082513	0.0276439
MCF2	1104	30	7	1097	0.0026765	0.002478	0.0846	0.068	0.0818	null		0.429922	0.153463	0.153493	0.175631	0.0626229	0.0248679
MEF2C	473	10	0	473	0.002086	0.001012	0.054	0.2496	0.0589	V↑	0.752572	0.243182	0.0852047	0.150017	0.354283	0.120549	0.046764
MYOCD	903	12	15	888	0.0009375	0.001848	0.0713	0.0377	0.1073	null		0.386083	0.161142	0.139001	0.199307	0.0846661	0.0298013
NCAM1	1120	21	15	1105	0.0010605	0.001496	0.0888	0.0411	0.0732	P↓	0.0351705	0.25346	0.0935946	0.257956	0.256748	0.0961242	0.0421179
NEFL	560	4	5	555	0.000422	0.000731	0.0518	0.0223	0.05	null		0.394847	0.136311	0.182047	0.195026	0.0670459	0.0247227
NOS1	1442	28	15	1427	0.000844	0.00057	0.0553	0.0295	0.0089	A↓	7.49733	0.0106479	0.452158	0.0397373	0.0059828	0.328648	0.162825
NPAS2	931	21	15	916	0.000936	0.00357	0.1248	0.0807	0.2069	null		0.367871	0.21492	0.131982	0.160355	0.08954	0.035332
OSTM1	311	6	2	309	0.0050955	0.004381	0.239	0.2186	0.1482	null		0.446297	0.178065	0.147438	0.145704	0.0582215	0.0242754
P4HB	515	11	1	514	0.000844	0.002662	0.1506	0.0497	0.0854	P↓	1.12974	0.219589	0.100486	0.386305	0.129635	0.0635071	0.100477
PARG	954	18	6	948	0.00153	0.005686	0.2257	0.0734	0.2969	V↓	2.90483	0.101986	0.0521481	0.0650896	0.435828	0.189059	0.155889
PARP1	1011	23	0	1011	0.0013705	0.000893	0.0483	0.0388	0.0465	null		0.434698	0.154494	0.164167	0.166492	0.0591184	0.0210311
PDE4D	778	15	0	778	0.0011045	0.003327	0.0571	0.0461	0.1141	null		0.326543	0.239098	0.177553	0.125019	0.0871542	0.044633
PLA2G6	805	16	0	805	0.000396	0.002252	0.0986	0.0148	0.067	V↓	3.49127	0.0831723	0.0329506	0.0999976	0.476539	0.212752	0.0945878
PLP1	277	7	0	277	1e-06	2e-06	0.0289	0.0001	0.0001	null		0.375447	0.155331	0.226188	0.155153	0.0651382	0.0227425
POLG	1207	22	3	1204	0.0020995	0.005078	0.1108	0.0914	0.1498	null		0.381788	0.192356	0.16279	0.152497	0.0756149	0.0349537
PTPRD	1963	37	0	1963	0.000578	0.001648	0.0199	0.0233	0.097	A↑	6.01507	0.0290003	0.586894	0.0714462	0.0109624	0.217731	0.0839663
PTPRF	1922	35	0	1922	0.00017	0.00047	0.0276	0.0074	0.0304	V↓	0.409212	0.234292	0.0880573	0.207787	0.287486	0.104522	0.0778561
RAI1	1927	4	21	1906	0.0022785	0.003016	0.0514	0.075	0.0989	P↑	3.57136	0.0900376	0.132399	0.536953	0.050445	0.0860679	0.104098
RIMS1	1662	35	0	1662	0.0012215	0.001367	0.0613	0.0821	0.1016	null		0.37367	0.183643	0.166766	0.147728	0.0773858	0.050807
SEPTIN5	369	12	0	369	1e-06	2e-06	0.0054	0.0001	0.0001	null		0.432228	0.15538	0.179309	0.157031	0.0565195	0.0195326
SIM2	760	11	4	756	0.000595	0.003256	0.1343	0.0203	0.2122	V↓	3.77414	0.0655778	0.0282629	0.0245915	0.432813	0.200709	0.248045
SLC17A5	484	11	2	482	0.004091	0.003835	0.1125	0.1322	0.1412	null		0.445721	0.158949	0.156067	0.155789	0.0560567	0.0274173	gene two codons shorter in Lstr, Tgut due to early stop codon
SNRPB	240	7	0	240	1e-06	2e-06	0.0001	0.0001	0.0001	null		0.483275	0.151705	0.151705	0.151705	0.0471251	0.014484
ST6GALNAC5	347	5	2	345	0.0033755	0.001232	0.0784	0.2306	0.0236	V↑	0.012947	0.238063	0.204375	0.0789967	0.239609	0.178156	0.0608017
STAT3	771	23	0	771	5.5e-06	4e-06	0.0017	0.0001	0.0001	null		0.403315	0.153753	0.19296	0.163304	0.0630307	0.0236382
SUMF1	363	9	16	347	0.0072375	0.009197	0.2372	0.1984	0.2558	null		0.443014	0.148093	0.17469	0.15468	0.0512658	0.0282572
SYCP1	854	28	0	854	0.012716	0.011685	0.3745	0.676	0.5107	P↑	0.950951	0.186259	0.085327	0.299649	0.252795	0.128715	0.047255
TLR4	842	3	0	842	0.008597	0.007555	0.4441	0.3083	0.4537	null		0.35998	0.128373	0.156021	0.238998	0.084227	0.0324011
TOP2B	1625	36	6	1619	0.000447	0.000833	0.027	0.0306	0.0364	null		0.405904	0.159354	0.193395	0.146926	0.0580247	0.0363959
TRPM7	1889	40	0	1889	0.000676	0.000582	0.049	0.0363	0.0314	null		0.394779	0.172516	0.161413	0.161157	0.0711152	0.0390191
TSC1	1154	21	0	1154	0.001536	0.003698	0.2654	0.1356	0.2356	null		0.324178	0.115864	0.189038	0.246627	0.0907323	0.0335608
UCHL1	224	9	0	224	1.5e-06	4e-06	0.0245	0.0001	0.0001	null		0.368254	0.170128	0.226914	0.144121	0.0695259	0.0210576
VEGFA	216	8	0	216	1e-06	0	0.0001	0.0001	0.0001	null		0.489054	0.150483	0.150483	0.150483	0.0457534	0.013743
WNK1	2934	32	20	2914	0.0024325	0.002404	0.2542	0.1555	0.1565	P↓	1.29759	0.13065	0.128431	0.126044	0.169008	0.195903	0.249965
X) Genes putatively involved in parental care and/or social behavior generally (e.g., Lopes & de Bruijn 2021; Lynch et al. 2019, 2020).
					dN		dN/dS					model weights
gene	cds	exons*	gaps	N	Vidua	Aimb	outgroup	Vidua	Aimb	best	∆AICc	null	A	P	V	VA	VAp
56 social combined	21365	225	126	21239	0.0032065	0.003064	0.1047	0.128	0.1118	V↑	12.5846	0.00149011	0.000560381	0.0297147	0.80524	0.0324386	0.130556
ACHE	618	3	6	612	0.0012445	0.000619	0.0344	0.052	0.0114	null		0.295963	0.210458	0.234253	0.115401	0.0811767	0.0627476
ADRA2A	444	1	0	444	0.002976	4e-06	0.0441	0.0489	0.0001	A↓	1.49596	0.201931	0.426627	0.0879175	0.0739053	0.145872	0.0637477
AVPR1A (VTR1A, V1A, VT4?)	430	2	0	430	4e-06	0.000926	0.0432	0.0001	0.0343	V↓	1.12811	0.207676	0.0703415	0.178458	0.365051	0.125452	0.0530211
AVPR1B (VTR1B, V1B, VT2)	435	2	26	409	0.0021	0.003681	0.086	0.0633	0.0734	null		0.442927	0.152271	0.15233	0.161425	0.0555975	0.0354499
BDNF	246	1	0	246	0.0014435	2e-06	0.0362	0.0746	0.0001	null		0.422599	0.190517	0.133476	0.160419	0.0698387	0.0231506
CCK	130	2	1	129	0.001104	0.007384	0.1036	0.0603	0.4209	A↑	2.02868	0.169939	0.468614	0.131576	0.0498121	0.139675	0.0403835
CCKAR	430	5	0	430	0.0032495	0.001729	0.0194	0.0982	0.0287	V↑	1.74215	0.16937	0.0610433	0.164264	0.404707	0.150269	0.050347
CCKBR	436	5	3	433	0.0033115	0.013593	0.3695	0.0448	0.4061	V↓	3.34383	0.091207	0.033309	0.130025	0.485436	0.164429	0.0955944
COMT	265	5	0	265	0.006383	0.003351	0.2572	0.3176	0.2042	null		0.463348	0.152412	0.15871	0.156308	0.0507934	0.0184284
COMTD1	257	7	0	257	0.001531	0.005383	0.0792	0.0661	0.1678	null		0.415868	0.209161	0.1405	0.137861	0.0666427	0.0299672
CRHBP	322	7	0	322	0.0022715	0.001451	0.1173	0.1093	0.1944	null		0.461161	0.163591	0.152341	0.152193	0.0534463	0.0172666
CRHR1 (CRFR)	446	13	2	444	0.0033945	0.003752	0.1006	0.0866	0.1036	null		0.454632	0.154727	0.154248	0.160124	0.0540842	0.0221844
DRD1	453	1	0	453	2.5e-06	0.002928	0.1005	0.0001	0.1511	null		0.32097	0.11268	0.153875	0.251155	0.0970811	0.064239
DRD2	443	7	0	443	2.5e-06	1e-06	0.0434	0.0001	0.0001	null		0.288827	0.122101	0.154235	0.276655	0.118367	0.0398148
EGR1	510	2	1	509	0.0034545	0.003953	0.1261	0.4828	0.24	V↑	0.521541	0.210846	0.0948564	0.193049	0.273663	0.14445	0.0831366
ESR1	621	9	0	621	0.002288	0.001505	0.0945	0.1456	0.1162	null		0.411737	0.145219	0.143755	0.174984	0.0623316	0.0619727
ESR2	568	9	0	568	0.005532	0.005029	0.0935	0.1894	0.1406	P↑	1.20254	0.207362	0.0860314	0.378318	0.189994	0.0866774	0.051617
GAL	117	5	0	117	0.005583	0.001253	0.0516	0.2186	0.0521	V↑	2.26814	0.16121	0.0419963	0.123644	0.501087	0.123708	0.048355
GALR1	361	3	0	361	0.007239	4e-06	0.0706	0.1121	0.0001	A↓	1.98336	0.154303	0.415966	0.0530101	0.0908201	0.215195	0.0707055
GALR2	373	2	10	363	0.006821	0.004617	0.2131	0.2058	0.0954	null		0.324449	0.289773	0.147343	0.109968	0.0960025	0.032465
GALR3	415	2	2	413	0.0130535	0.012251	0.2838	1.658	0.3929	V↑	0.503306	0.256516	0.0874374	0.126159	0.329917	0.118169	0.0818018
GPER1	357	1	0	357	0.0011385	0.001298	0.0214	0.1228	0.0923	null		0.322629	0.151545	0.208865	0.180545	0.0994659	0.0369493
GRPR	387	3	0	387	0.001367	1e-06	0.0634	0.1642	0.0001	null		0.318835	0.188571	0.157806	0.180609	0.100177	0.0540023
HTR2C	472	3	0	472	0.0027085	0.005002	0.0348	0.0588	0.1566	A↑	2.15213	0.133264	0.390879	0.189709	0.0471718	0.169152	0.0698244
MANF	180	4	0	180	4e-06	2e-06	0.0193	84.9152	0.0001	null		0.470264	0.155275	0.175849	0.138825	0.045149	0.0146381
NLGN4X	836	6	0	836	1e-06	2e-06	0.003	0.0001	0.0001	null		0.426561	0.163555	0.181778	0.163342	0.0629759	0.00178918
NPY1R	385	2	0	385	0.0009945	0.004919	0.072	0.0551	0.2568	A↑	0.755496	0.247106	0.360526	0.108003	0.0923096	0.123544	0.0685118
NPY2R	385	1	0	385	0.001702	0.003663	0.0227	0.0947	0.1527	P↑	4.70198	0.0592807	0.110934	0.622207	0.0335441	0.09806	0.0759739
NPY5R	443	1	0	443	0.0018805	0.004432	0.1227	0.1093	0.1924	null		0.428243	0.182622	0.156355	0.14971	0.0621925	0.0208783
NTF3	270	2	0	270	3.5e-06	0.010481	0.0546	0.0001	0.3142	A↑	4.54427	0.0431822	0.418872	0.0456989	0.0535275	0.330272	0.108448
NTRK2 (TrkB)	842	18	0	842	0.0018155	0.001712	0.0113	0.0816	0.0736	P↑	4.54613	0.0416683	0.0448931	0.404562	0.0975216	0.292102	0.119253	also included among Z-linked loci with missing or non-functional W-linked gene copy
NTRK3	852	18	2	850	2e-06	0.000514	0.0152	0.0001	0.011	null		0.344081	0.123307	0.122616	0.259056	0.0954792	0.0554604
NTS	164	4	0	164	0.00066	2e-06	0.035	0.0307	0.0001	null		0.444846	0.207034	0.144529	0.12828	0.058934	0.0163769
NTSR1	403	4	1	402	3.5e-06	0.002687	0.0706	0.0001	0.3007	null		0.26953	0.167337	0.10098	0.269471	0.136487	0.0561942
OT (OXT, mesotocin)	123	3	0	123	3e-06	0.003202	0.078	0.0001	0.0545	null		0.418507	0.112079	0.187521	0.205491	0.0543844	0.022017
OXTR (OTR, MTR3, VT3)	390	2	0	390	0.0006565	5e-06	0.0809	0.0876	0.0001	A↓	4.00035	0.078753	0.582011	0.0433724	0.0267924	0.194249	0.0748217
PDYN	231	2	7	224	0.0084455	0.006788	0.1249	0.1156	0.1107	null		0.480467	0.150591	0.154263	0.149803	0.0465624	0.0183132
PENK	267	2	0	267	0.0038865	0.001762	0.1419	0.2747	0.0732	null		0.410964	0.167465	0.13132	0.18777	0.0714351	0.0310451
PGR	781	8	7	774	0.0050485	0.004174	0.1567	0.1704	0.1371	null		0.441828	0.16325	0.155405	0.16049	0.0584217	0.0206042
PRL	229	5	0	229	0.000998	4e-06	0.024	0.0633	0.0001	null		0.356759	0.239817	0.112584	0.163652	0.0961201	0.0310675
PRLHR	344	1	0	344	0.0115225	0.004395	0.2252	0.3554	0.234	null		0.2999	0.0995864	0.22035	0.26181	0.0862184	0.0321363
PRLR	827	12	7	820	0.0029935	0.008571	0.1159	0.1434	0.2538	null		0.298283	0.177777	0.25151	0.10525	0.0642465	0.102933
PTGES	146	3	0	146	0.003717	0.0076	0.1027	0.0887	0.2375	null		0.472333	0.189117	0.13841	0.134144	0.0520199	0.0139768
QRFP	152	1	27	125	0.0059935	0.005358	0.1009	0.2844	0.2757	P↑	2.57967	0.14605	0.0798002	0.53048	0.119311	0.0897883	0.0345707
QRFPR	432	6	0	432	0.015203	0.017699	0.4562	1.0749	1.2726	null		0.307512	0.175788	0.240999	0.162912	0.0834492	0.0293397
SST	116	2	0	116	5e-07	1e-06	0.0211	0.0001	0.0001	null		0.456603	0.144533	0.198348	0.143824	0.0450565	0.0116364
SSTR1	356	1	0	356	0.0005865	0.003073	0.0054	0.017	0.0318	A↑	0.999309	0.177369	0.292332	0.274551	0.0666282	0.13895	0.0501696
SSTR2	371	1	2	369	0.0033535	0.003526	0.0634	0.1295	0.0799	null		0.387734	0.130166	0.167208	0.2102	0.0731512	0.0315404
SSTR3	401	1	0	401	0.022323	0.004737	0.0466	0.1431	0.0317	V↑A↓	8.59275	0.0062417	0.00397204	0.00393609	0.373347	0.154156	0.458347
SSTR4	413	1	3	410	0.0028495	0.001028	0.051	0.0625	0.0093	A↓	1.57917	0.185609	0.408801	0.137128	0.0671643	0.141343	0.0599558
SSTR5	370	1	0	370	5e-07	2e-06	0.0001	0.0001	7.4889	null		0.465865	0.155263	0.155262	0.155262	0.0514232	0.016924
STMN1	148	4	0	148	0.0020085	0	0.0001	0.0188	0.0001	null		0.317756	0.0885678	0.20312	0.290066	0.0792645	0.0212255
TRH	258	2	2	256	0.0022735	0.002447	0.0752	0.1644	0.1279	null		0.409671	0.147641	0.176672	0.175218	0.0652967	0.025501
TRHR	393	3	0	393	0.0182005	0.018064	1.1679	1.0585	0.6379	null		0.37546	0.20467	0.196643	0.126122	0.0690109	0.0280938
UCN3	154	1	12	142	0.014094	0.014199	0.1168	0.5724	0.1753	P↑	1.07889	0.208643	0.0730606	0.357834	0.244106	0.0754025	0.0409542
VT (AVT)	167	3	5	162	0.006984	8e-06	0.1218	0.4091	0.0001	A↓	2.57457	0.119442	0.43273	0.0368082	0.0746059	0.263089	0.0733254
Y) Genes putatively associated with egg production in galliforms or anseriforms (Mishra et al. 2020; Bhavana et al. 2022).
					dN		dN/dS					model weights
gene	cds	exons*	gaps	N	Vidua	Aimb	outgroup	Vidua	Aimb	best	∆AICc	null	A	P	V	VA	VAp
egg production	8365	159	58	8307	0.0043275	0.004782	0.2507	0.215	0.2332	A↓V↓↓	2.49118	0.128216	0.0506481	0.257337	0.0837703	0.0344801	0.445548
AKIRIN2	193	5	0	193	1.5e-06	1e-06	0.0001	0.0001	0.0001	null		0.496118	0.148963	0.148963	0.148963	0.0441128	0.0128808
CAPRIN2	1201	20	9	1192	0.004949	0.002727	0.1555	0.3841	0.1771	V↑	3.19279	0.0930668	0.0332546	0.143924	0.459303	0.169544	0.100908
DBH	619	12	2	617	0.003411	0.006329	0.0923	0.1239	0.3071	A↑	2.57771	0.098967	0.359115	0.286258	0.0377579	0.144302	0.0735999
GRIA1	902	16	0	902	0.00037	0.000977	0.0207	0.0214	0.0257	null		0.426018	0.155897	0.182032	0.150758	0.0550649	0.0302301
HSD17B2	370	5	8	362	0.011951	0.011847	0.3235	0.3553	0.2836	null		0.424238	0.146984	0.154058	0.144587	0.0495202	0.080613	excluded variable-length portion of last coding exon, trimmed to last conserved codon
IGFBP7	293	5	15	278	0.0050785	0.001598	0.1236	0.1663	0.081	null		0.446925	0.157728	0.145859	0.160899	0.0550032	0.0335855
IL1R1	568	10	0	568	0.007097	0.012366	0.3268	0.1648	0.3293	V↓	0.830855	0.241031	0.0900387	0.134787	0.365166	0.125704	0.0432744
LHX9	378	5	0	378	0	0	0.0266	0.0001	0.0001	null		0.458344	0.153098	0.166404	0.153099	0.0508275	0.0182281
MEF2C	473	10	0	473	0.002086	0.001012	0.054	0.2496	0.0589	V↑	0.752572	0.243182	0.0852047	0.150017	0.354283	0.120549	0.046764
PAR6 (PARD6A)	357	3	0	357	4.5e-06	0.002077	0.0154	0.0001	0.0386	null		0.273492	0.15891	0.0950906	0.26384	0.136338	0.0723298
RAB27A	221	5	0	221	4.5e-06	1e-06	0.0001	0.0001	0.0001	null		0.487735	0.150764	0.150764	0.150764	0.0460642	0.0139093	analyzed instead of RAB27B, which appears to be absent in songbirds
RPS15	145	4	0	145	8.5e-06	1.5e-05	0.0001	0.0001	0.0001	null		0.519366	0.143762	0.143762	0.143762	0.0389907	0.0103564
SIX1	282	2	0	282	0.0013075	0.001405	0.0001	0.0295	0.0869	P↑	0.50949	0.250945	0.168502	0.323752	0.0879075	0.128275	0.0406183
STC2	308	4	7	301	0.003932	0.000673	0.1787	0.9552	0.1274	null		0.319051	0.11328	0.150413	0.2798	0.0906189	0.0468376
STK3	490	11	0	490	2.5e-06	0.000931	0.0274	0.0001	0.0681	null		0.325549	0.156772	0.117787	0.248313	0.107807	0.0437714
SYCE2	162	3	5	157	0.0148065	0.006419	0.2129	0.422	0.1185	null		0.442438	0.152474	0.126958	0.176087	0.0593113	0.042733
SYCP2L	835	32	12	823	0.0164265	0.019019	1.1917	0.7369	0.7044	P↓	3.43705	0.0920666	0.0955112	0.513392	0.0820208	0.0987184	0.118291
TGFBR2	568	7	0	568	0.0010365	2e-06	0.06	0.0431	0.0001	A↓	0.475545	0.250833	0.318161	0.169432	0.0909552	0.119898	0.0507199

## Sheet: Suppl. Table 6 mtDNA samples
Supplementary Table 6. Samples used for mtDNA phylogeny and PAML analyses of mitochondrial genes.
Species	Sample_ID	BioSample	SRA accession	mtDNA accession	Origin	Reference	Notes
Molothrus ater	Mate_602207_mt	SAMN48441455	SRR33531138	PV690438	United States, Maryland	this study
Molothrus ater	Mate_609756_mt	SAMN48441460	SRR33531133	PV690443	United States, Maryland	this study
Agelaius phoeniceus	Apho_647108_mt	SAMN48451615	SRR33541150	PV690448	United States, North Dakota	this study
Agelaius phoeniceus	Apho_652568_mt	SAMN48451620	SRR33541145	PV690453	United States, Montana	this study
Serinus canaria	Scan_SRR2895902_mt	SAMN04225733	SRR2895902	NA*	Spain, La Palma Island	Lopes et al. 2016
Serinus canaria	Scan_SRR10959386_mt	SAMN13911126	SRR10959386	NA*	captive ("Belgian waterslager")	Madison et al. 2025
Lonchura striata	Lstr_LST040_mt	SAMN23039805	SRR16914206	NA*	Taiwan	Lu et al. 2022
Lonchura striata	Lstr_LST037_mt	SAMN23039803	SRR16914208	NA*	Taiwan	Lu et al. 2022
Lonchura g. grandis	Lgran_MF770395_mt	SAMN07462688	SRR5945214	MF770395	Papua New Guinea, Milne Bay	Stryjewski & Sorenson 2017
Lonchura g. grandis	Lgran_MF770399_mt	SAMN07462693	SRR5945220	MF770399	Papua New Guinea, Milne Bay	Stryjewski & Sorenson 2017
Lonchura g. ernesti	Lgran_MF770400_mt	SAMN07462696	SRR5945221	MF770400	Papua New Guinea, Madang	Stryjewski & Sorenson 2017
Lonchura g. ernesti	Lgran_MF770409_mt	SAMN07462719	SRR5945175	MF770409	Papua New Guinea, Madang	Stryjewski & Sorenson 2017
Poephila a. acuticauda	Pacu_G169_mt	SAMEA3532835	ERR1013138	NA*	Australia, Western Australia	Singhal et al. 2015
Poephila a. acuticauda	Pacu_W2994_mt	SAMEA3532841	ERR1013144	NA*	Australia, Western Australia	Singhal et al. 2015
Poephila a. hecki	Pacu_73958_mt	SAMEA3532851	ERR1013154	NA*	Australia, Nothern Territory	Singhal et al. 2015
Poephila a. hecki	Pacu_73942_mt	SAMEA3532849	ERR1013152	NA*	Australia, Nothern Territory	Singhal et al. 2015
Taeniopygia castanotis	Tgut_26881_mt	SAMEA3532868	ERR1013172	NA*	Australia, New South Wales	Singhal et al. 2015
Taeniopygia castanotis	Tgut_28456_mt	SAMEA3532861	ERR1013165	NA*	Australia, New South Wales	Singhal et al. 2015
Vidua macroura	Vmac_P44_mt	SAMN48428845	SRR33515991	PV690484	South Africa	this study
Vidua macroura	Vmac_P73_mt	SAMN48428848	SRR33516002	PV690487	South Africa	this study
Vidua macroura	Vmac_MN356270_mt	SAMN12253861	SRR9947356, 58, 59	MN356270	Ghana	Feng et al. 2020
Vidua macroura	Vmac_SRR27185606_mt	SAMN27279399	SRR27185606*	PV751012	captive (West Africa)	this study	*assembled from HiC seqeunce data
Vidua camerunensis	Vcam_CNB217_mt	SAMN48337447	SRR33430723	PV690464	Cameroon	this study
Vidua camerunensis	Vcam_MDS008_mt	SAMN48337455	SRR33430731	PV690473	Cameroon	this study
Vidua chalybeata	Vcha_JMD1304_mt	SAMN48852048	SRR33792549	PV751013	Tanzania	this study
Vidua chalybeata	Vcha_JMD1307_mt	SAMN48852049	SRR33792548	PV751014	Tanzania	this study
Anomalospiza imberbis	Aimb_genome_mt	SAMN36607522	SRR25341904*	PV751015	Zambia	this study	*assembled from RNA-seq data, same source as genome bird
Anomalospiza imberbis	Aimb_2013_ERY045_A2_mt	SAMN26172029	SRR33418168	PV690501	Zambia	this study
Anomalospiza imberbis	Aimb_2007_ANOM24_A1_mt	SAMN26171971	SRR33418163	PV690493	Zambia	this study
Anomalospiza imberbis	Aimb_2012_JUN006_A1_mt	SAMN26172030	SRR33418170	PV690496	Zambia	this study
Anomalospiza imberbis	Aimb_2014_JUN21_A1_mt	SAMN26172061	SRR33418167	PV690507	Zambia	this study
Anomalospiza imberbis	Aimb_2007_ANOM15_A2_mt	SAMN26171966	SRR33418154	PV690491	Zambia	this study
Anomalospiza imberbis	Aimb_2014_PS058_A1_mt	SAMN26172073	SRR33418155	PV690510	Zambia	this study
Anomalospiza imberbis	Aimb_2012_PS024_A1_mt	SAMN26171994	SRR33418173	PV690497	Zambia	this study
Anomalospiza imberbis	Aimb_2013_PS171_A1_mt	SAMN26172039	SRR33418159	PV690504	Zambia	this study
*GenBank does not allow submission of assembled genomes based on data previously submitted by other researchers. See mtDNA data files for these sequences.

## Sheet: Suppl. Table 7 W annotations
Supplementary Table 7. Status of 78 W-linked protein-coding genes in focal taxa, including gene-by-gene details with genome annotations for each gene/species. Status codes (F, f, P, RP, L) are defined in table S1. Numbers following status codes (e.g., “f56,” “P85”) represent the percentage of the original coding sequence that remains in the W-linked copy of the gene/pseudogene.
full-length, functional	(F)
reduced, putatively functional	(f)
pseudogene	(P)
remnant pseudogene	(RP)
entirely lost	(L)
W-chromosome status of individual genes														Chromosome or contig accession number and gene annotation by species; NF = not found; "short reads assembled" = W-linked copy missing from genome assembly but coding regions could be assembled from short-read data
Gene	Apho	Mate	Scan	Tgut	Lstr	Vmac	Vcha	Aimb_PB	Aimb_PR	Aimb_CE	Aimb_CJ	Notes	reference annotation	Apho	Mate	Scan	Tgut	Lstr	Vmac	Vcha	Aimb
APBA1	L	L	L	L	L	L	L	L	L	L	L		NA	NF	NF	NF	NF	NF	NF	NF	NF
ARK2N (C18orf25)	F	F	F	F	F	F	F	F	F	F	F			NC_071709.1 — LOC129132431	NC_050510.2 — LOC118701504	NC_066342.1 — LOC103824813	NC_045028.1 — LOC116806906	short reads assembled	NW_026530539.1 — LOC128822770	NW_026530320.1 — LOC128782850	NW_027099315.1 — LOC137465599
ARRDC3	F	F	F	F	F	F	F	F	F	F	F			NC_071709.1 — LOC129132400	short reads assembled	NC_066342.1 — LOC103824792	NC_045028.1 — LOC116806883	short reads assembled	NW_026530537.1 — LOC128822756	NW_026530321.1 — LOC128782855	NW_027099339.1 — LOC137465624
ATOSB	L	L	P58	L	L	L	L	L	L	L	L			NF	NF	NC_066342.1 — not annotated	NF	NF	NF	NF	NF
ATP5F1A	F	F	F	F	F	F	F	F	F	F	F			NC_071709.1 — LOC129132419	NC_050510.2 — LOC118701527	NC_066342.1 — LOC103824915	NC_045028.1 — LOC116806651	short reads assembled	NW_026530534.1 — LOC128822721	NW_026530320.1 — LOC128782853	NW_027099315.1 — LOC137465614
BTF3	F	F	F	F	F	F	F	L	L	L	L			NC_071709.1 — LOC129132415	short reads assembled	NC_066342.1 — LOC103825074	NC_045028.1 — LOC116806881	short reads assembled	NW_026530534.1 — LOC128822719	NW_026530323.1 — LOC128782864	NF
CDC37L1	F	F	F	P90	F	L	P90	L	L	L	L			NW_026530958.1 — LOC129133622	short reads assembled	NC_066342.1 — LOC103814606	NC_045028.1 — LOC116806914	short reads assembled	NF	NW_026530344.1 — LOC128783026	NF
CERT1	F	F	F	L	L	F	F	F	F	F	F			short reads assembled	short reads assembled	NC_066342.1 — LOC103824645	NF	NF	short reads assembled	NC_071569.1 — LOC128802372	short reads assembled
CHD1	F	F	F	F	F	F	F	F	F	F	F			NW_026530962.1 — LOC129133658	NC_050510.2 — LOC118701542	NC_066342.1 — LOC103823411	NC_045028.1 — CHD1W	short reads assembled	short reads assembled	NW_026530331.1 — LOC128782875	NC_089720.1 — LOC137464305
CKMT2	F	F	F	F	F	F	F	F	F	F	F			NC_071709.1 — LOC129132422	NC_050510.2 — LOC118701526	NC_066342.1 — LOC103824904	NC_045028.1 — LOC116806982	short reads assembled	short reads assembled	NC_071569.1 — LOC128802377	NW_027099315.1 — LOC137465592
CTIF	F	F	F	RP10	RP13	L	L	L	L	L	L			NC_071709.1 — LOC129132424	NC_050510.2 — LOC118701491	NC_066342.1 — LOC108962568	NC_045028.1 — not annotated	short reads assembled	NF	NF	NF
CWH18orf32	F	F	F	F	F	F	F	L	L	L	L			NC_071709.1 — LOC129132414	NC_050510.2 — LOC118701512	NC_066342.1 — LOC127060974	NC_045028.1 — LOC116806892	short reads assembled	short reads assembled	NC_071569.1 — not annotated	NF
DCAF12	F	F	F	F	F	F	F	F	F	F	F	1		NC_071709.1 — LOC129132392	NC_050510.2 — LOC118701524	NC_066342.1 — LOC103824724	short reads assembled	short reads assembled	NW_026530538.1 — LOC128822758	NW_026530342.1 — LOC128783015	NC_089720.1 — LOC137464292
FAM219A	F	F	F	P47	P53	RP29	L	RP28	RP28	RP28	RP28			NC_071709.1 — LOC129132430	NC_050510.2 — LOC118701559	NC_066342.1 — LOC103825026	NC_045028.1 — not annotated	short reads assembled	NW_026530534.1 — not annotated	NF	NW_027099315.1 — not annotated
FCHO2	P73	P83	f83	P51	RP6	P60	P60	L	L	RP9	RP9	6		NC_071709.1 — not annotated	short reads assembled	NC_066342.1 — LOC127060961	NC_045028.1 — LOC116806920/929	short reads assembled	NW_026530535.1 — LOC128822731	NW_026530331.1 — LOC128782877	NC_089720.1 — not annotated
FEM1C	F	F	F	P71	P100	F	F	L	L	L	L	7		NW_026530959.1 — LOC129133625/628	short reads assembled	NC_066342.1 — LOC103824911	NC_045028.1 — LOC116806859/912	short reads assembled	NW_026530535.1 — LOC128822733	NW_026530341.1 — LOC128783004	NF
FOXD1	P100	P100	L	L	L	L	L	L	L	L	L			NC_071709.1 — not annotated	short reads assembled	NF	NF	NF	NF	NF	NF
GNAQ	F	F	F	F	F	F	F	F	F	F	F			short reads assembled	NC_050510.2 — LOC118701514	NC_066342.1 — LOC103824735	NC_045028.1 — LOC116806898	short reads assembled	NC_071610.1 — LOC128821385	NW_026530343.1 — LOC128783022	NW_027099315.1 — LOC137465571
GOLPH3	F	F	F	F	F	F	F	F	F	F	F			NW_026530956.1 — LOC129133608	NW_026530820.1 — LOC118701546	NC_066342.1 — LOC127060973	NC_045028.1 — LOC116806866	short reads assembled	NC_071610.1 — LOC128821387	NW_026530338.1 — LOC128782887	NC_089720.1 — LOC137464280
GPBP1	L	L	L	RP7	L	L	L	L	L	L	L			NF	NF	NF	NC_045028.1 — not annotated	NF	NF	NF	NF
HINT1	f56	f56	f56	f56	f56	f56	f56	f56	f56	f56	f56	2		NW_026530959.1 — various	short reads assembled	NC_066342.1 — ENSSCAG00000019919	NC_045028.1 — LOC100189940/90380	short reads assembled	NW_026530536.1 — not annotated	NW_026530320.1 — LOC128782844	NC_089720.1 — LOC137464253
HMGCS1	L	L	P50	L	L	RP12	RP12	L	L	L	L			NF	NF	NC_066342.1 — not annotated	NF	NF	NW_026530534.1 — not annotated	NW_026530327.1 — not annotated	NF
HNRNPK	F	F	F	F	F	F	F	F	F	F	F			NC_071709.1 — LOC129132417	NC_050510.2 — LOC118701540	NC_066342.1 — LOC103823413	NC_045028.1 — LOC116806864	short reads assembled	short reads assembled	NC_071569.1 — LOC128802359	NW_027099315.1 — LOC137465609
HOMER1	F	F	P49	L	L	L	L	RP24	RP24	RP15	RP15			NC_071709.1 — LOC129132389	NC_050510.2 — LOC118701501	NC_066342.1 — LOC127060959	NF	NF	NF	NF	NW_027099315.1 — not annotated
IFNW1	L	L	L	L	L	L	L	L	L	L	L			NF	NF	NF	NF	NF	NF	NF	NF
KCMF1	F	F	F	F	F	F	F	F	F	F	F			NC_071709.1 — LOC129132412	short reads assembled	NC_066342.1 — LOC103824839	NC_045028.1 — LOC116806879	short reads assembled	short reads assembled	NC_071569.1 — LOC128802362	NW_027099315.1 — LOC137465563
KCNN2	L	L	RP30	L	L	L	L	L	L	L	L			NF	NF	NC_066342.1 — LOC103821203	NF	NF	NF	NF	NF
KIF24	P40	P40	L	RP3	RP24	L	L	L	L	L	L			NC_071709.1 — not annotated	NC_050510.2 — not annotated	NF	NC_045028.1 — not annotated	short reads assembled	NF	NF	NF
KIF2A	F	F	F	F	P88	P45	P73	P46	P46	P46	P46			NW_026530961.1 — LOC129133654	NC_050510.2 — LOC118701490	NC_066342.1 — LOC103826099	NC_045028.1 — LOC116806870	short reads assembled	NW_026530535.1 — LOC128822735	NW_026530322.1 — LOC128782856	NC_089720.1 — not annotated
MACIR	L	L	F	L	L	L	L	L	L	L	L	8		NF	NF	NC_066342.1 — LOC103824800	NF	NF	NF	NF	NF
MAP1B	F	F	F	F	F	F	F	P100	P100	P100	P100			NW_026530961.1 — LOC129133653	NC_050510.2 — LOC118701532	NC_066342.1 — LOC103824875	NC_045028.1 — LOC116806990	short reads assembled	short reads assembled	NC_071569.1 — LOC128802383	NW_027099315.1 — LOC137465556
MAPK4	P40	P40	L	L	L	L	L	L	L	L	L			NC_071709.1 — not annotated	NC_050510.2 — not annotated	NF	NF	NF	NF	NF	NF
ME2	L	P100	P92	L	L	P48	P48	RP12	RP12	RP12	RP12			NF	NC_050510.2 — not annotated	NC_066342.1 — not annotated	NF	NF	NC_071610.1 — LOC128821380	NW_026530339.1 — LOC128782890	NW_027099315.1 — not annotated
MEX3C	F	F	F	P100	P85	F	F	P88	P88	L	L	9		NC_071709.1 — LOC129132426	NC_050510.2 — LOC118701551	NC_066342.1 — MEX3C	NC_045028.1 — not annotated	short reads assembled	NC_071610.1 — LOC128821394	NW_026530339.1 — MEX3C	NW_027099315.1 — MEX3C
MIER3	F	F	F	F	F	F	F	F	F	F	F			NW_026530957.1 — LOC129133614	short reads assembled	NC_066342.1 — LOC103821046	NC_045028.1 — LOC116806869	short reads assembled	NW_026530535.1 — LOC128822728	NW_026530331.1 — LOC128782876	short reads assembled
MRPS36	F	F	F	F	F	F	F	P88	P88	P88	P88			NW_026530961.1 — LOC129133656	NC_050510.2 — LOC118701560	NC_066342.1 — LOC103825436	NC_045028.1 — LOC115492298	short reads assembled	short reads assembled	NC_071569.1 — LOC128802382	NW_027099315.1 — LOC137465584
NFIL3	L	L	L	L	L	L	L	L	L	L	L			NF	NF	NF	NF	NF	NF	NF	NF
NIPBL	F	F	F	F	F	F	F	F	F	F	F			NW_026530961.1 — LOC129133650	NC_050510.2 — LOC118701528	NC_066342.1 — LOC103824654	NC_045028.1 — LOC116806872	short reads assembled	NC_071610.1 — LOC128821384	NW_026530339.1 — LOC128782892	NW_027099315.1 — LOC137465553
NTRK2	P72	P72	L	L	L	RP7	RP7	L	L	L	L			NC_071709.1 — not annotated	NC_050510.2 — not annotated	NF	NF	NF	short reads assembled	NW_026530321.1 — not annotated	NF
PAIP1	F	F	F	P71	F	F	F	P100	P100	P100	P100			NW_026530962.1 — LOC129133659	short reads assembled	NC_066342.1 — LOC103824791	NC_045028.1 — LOC116806924	short reads assembled	NW_026530534.1 — LOC128822720	NW_026530325.1 — LOC128782870	NC_089720.1 — not annotated
PCGF3	P51	P58	P50	RP15	L	P63	P69	L	L	L	L			short reads assembled	NW_026530820.1 — not annotated	NC_066342.1 — not annotated	NC_045028.1 — not annotated	NF	NW_026530538.1 — not annotated	NW_026530342.1 — not annotated	NF
PGGT1B	RP6	RP6	RP6	L	L	RP6	RP6	RP6	L	L	L			NW_026530959.1 — not annotated	short reads assembled	NC_066342.1 — not annotated	NF	NF	NW_026530535.1 — not annotated	NW_026530341.1 — not annotated	NF
PIAS2	F	F	RP33	L	L	F	P93	P71	P71	P71	P71			NC_071709.1 — LOC129132432	NC_050510.2 — LOC118701496	NC_066342.1 — LOC127060967	NF	NF	NW_026530539.1 — LOC128822769	NW_026530320.1 — not annotated	NW_027099315.1 — LOC137465550
PRKAA1	F	F	F	P92	P92	F	F	P100	P100	P100	P100			NW_026530960.1 — LOC129133642	short reads assembled	NC_066342.1 — LOC103824837	NC_045028.1 — LOC116806958	short reads assembled	NC_071610.1 — LOC128821386	NW_026530343.1 — LOC128783021	NC_089720.1 — LOC137464277
PTCH1	P70	P70	L	L	L	L	L	L	L	L	L			NW_026530961.1/962.1 — not annotated	NC_050510.2 — not annotated	NF	NF	NF	NF	NF	NF
RASA1	F	F	F	F	F	F	F	F	F	P85	F	3		NW_026530957.1 — LOC129133612	short reads assembled	NC_066342.1 — LOC103824743	NC_045028.1 — LOC116806888	short reads assembled	short reads assembled	NC_071569.1 — LOC128802364	NW_027099336.1 — LOC137465617
RFX3	F	F	F	F	F	F	F	F	F	F	F			NW_026530958.1 — LOC129133623	short reads assembled	NC_066342.1 — LOC103824681	NC_045028.1 — LOC116806853	short reads assembled	NW_026530536.1 — LOC128822748	NW_026530344.1 — LOC128783025	NC_089720.1 — LOC137464279
RGS7BP	L	L	L	RP9	L	RP9	RP9	L	L	L	L			NF	NF	NF	NC_045028.1 — not annotated	NF	NW_026530546.1 — not annotated	NW_026530344.1 — not annotated	NF
RICTOR	L	L	L	L	L	L	L	L	L	L	L			NF	NF	NF	NF	NF	NF	NF	NF
RNF38	RP18	P50	RP32	L	L	P41	P41	RP8	RP8	RP8	RP8			NC_071709.1 — not annotated	NC_050510.2 — not annotated	NC_066342.1 — not annotated	NF	NF	NW_026530536.1 — LOC128822752	NW_026530320.1 — LOC128782840	NW_027099315.1 — not annotated
RPL17	F	F	F	P100	F	F	F	L	L	L	L	10		NC_071709.1 — LOC129132413	NC_050510.2 — LOC118701511	NC_066342.1 — LOC103815789	NC_045028.1 — LOC116806891	short reads assembled	short reads assembled	NC_071569.1 — LOC128802380	NF
RPL37	F	F	F	F	F	F	F	F	F	F	F			NW_026530960.1 — LOC129133644	short reads assembled	NC_066342.1 — LOC103824835	NC_045028.1 — LOC100190109	short reads assembled	NC_071610.1 — LOC128821388	NW_026530343.1 — LOC128783020	NC_089720.1 — LOC137464281
SCAMP1	F	F	F	L	L	P84	P84	L	L	L	L			NC_071709.1 — LOC129132409	short reads assembled	NC_066342.1 — LOC108963739	NF	NF	NW_026530535.1 — not annotated	NW_026530331.1 — not annotated	NF
SETBP1	P83	P83	L	RP3	L	P83	P83	RP10	RP10	RP10	RP10			NC_071709.1 — LOC129132406	NC_050510.2 — LOC118701537	NF	NC_045028.1 — not annotated	NF	NC_071610.1 — not annotated	NW_026530339.1 — not annotated	NW_027099315.1 — not annotated
SLC25A51	F	F	F	F	P100	F	100	P100	P100	P100	P100			NC_071709.1 — LOC129132423	short reads assembled	NC_066342.1 — LOC103827276	NC_045028.1 — LOC121468028	short reads assembled	NW_026530534.1 — LOC128822710	NW_026530327.1 — LOC128782872	NC_089720.1 — not annotated
SMAD2	F	F	F	F	F	F	F	F	F	F	F			NC_071709.1 — LOC129132410	short reads assembled	NC_066342.1 — LOC103824734	NC_045028.1 — LOC116806871	short reads assembled	NW_026530534.1 — LOC128822722	NW_026530320.1 — LOC128782851	NW_027099315.1 — LOC137465562
SMAD4	F	F	F	F	F	F	F	f93	f93	f93	f93	4		NC_071709.1 — LOC129132418	NC_050510.2 — LOC118701541	NC_066342.1 — SMAD4	NC_045028.1 — LOC116806878	short reads assembled	NC_071610.1 — LOC128821393	NW_026530339.1 — LOC128782894	NW_027099315.1 — LOC137465561
SMAD7	F	F	F	L	L	L	L	L	L	L	L			NC_071709.1 — LOC129132428	NC_050510.2 — not annotated	NC_066342.1 — LOC127060972	NF	NF	NF	NF	NF
SMC2	L	L	L	L	L	L	L	L	L	L	L			NF	NF	NF	NF	NF	NF	NF	NF
SNX18	L	L	F	F	F	F	F	L	L	L	L			NF	NF	NC_066342.1 — LOC103821029	NC_045028.1 — LOC116806874	short reads assembled	NW_026530534.1 — LOC128822717	NW_026530323.1 — LOC128782863	NF
SNX2	L	RP14	P100	RP10	RP31	L	P57	L	L	L	L			NF	NC_050510.2 — not annotated	NC_066342.1 — not annotated	NC_045028.1 — not annotated	short reads assembled	NF	NW_026530342.1 — not annotated	NF
SPIN1	F	F	F	F	F	F	F	F	F	F	F			NC_071709.1 — LOC129132435	NC_050510.2 — LOC118701494	NC_066342.1 — LOC103824914	NC_045028.1 — LOC116806909	short reads assembled	NW_026530534.1 — LOC128822716	NW_026530324.1 — LOC128782868	NW_027099315.1 — LOC137465601
SREK1	F	F	F	F	F	F	F	F	F	F	F			short reads assembled	NC_050510.2 — LOC118701523	NC_066342.1 — LOC103825432	NC_045028.1 — LOC116806889	short reads assembled	NC_071610.1 — LOC128821375	NW_026530320.1 — LOC128782842	NW_027099315.1 — LOC137465558
SUB1	F	F	F	F	F	F	F	F	F	F	F			NW_026530958.1 — LOC129133621	short reads assembled	NC_066342.1 — LOC103824953	NC_045028.1 — LOC116806894	short reads assembled	NC_071610.1 — LOC128821392	NW_026530338.1 — LOC128782886	NW_027099315.1 — LOC137465602
TMED7	F	F	F	L	L	L	L	F	F	F	F			NW_026530959.1 — LOC129133629	short reads assembled	NC_066342.1 — LOC103824943	NF	NF	NF	NF	NC_089720.1 — LOC137464304
TMEM161B	P100	P100	P100	L	L	L	P47	P57	P57	P57	P57			NW_026530957.1 — not annotated	short reads assembled	NC_066342.1 — not annotated	NF	NF	NF	NW_026530321.1 — not annotated	NC_089720.1 — LOC137464269
TNPO1	F	F	F	F	F	F	F	F	F	F	F			NW_026530961.1 — LOC129133652	NC_050510.2 — LOC118701480	NC_066342.1 — LOC103823257	NC_045028.1 — LOC116806923	short reads assembled	NW_026530535.1 — LOC128822736	NW_026530331.1 — LOC128782878	NC_089720.1 — LOC137464250
UBAP1	F	F	F	F	F	F	F	F	F	F	F			NC_071709.1 — LOC129132437	NC_050510.2 — LOC118701510	NC_066342.1 — LOC103824730	short reads assembled	short reads assembled	NW_026530538.1 — LOC128822760	NW_026530342.1 — LOC128783014	NC_089720.1 — LOC137464323
UBAP2	F	F	F	F	F	F	F	P87	P87	P87	P87			NW_026530959.1 — LOC129133639	short reads assembled	NC_066342.1 — LOC103824732	NC_045028.1 — LOC116806978	short reads assembled	NW_026530535.1 — LOC128822745	NW_026530341.1 — LOC128783005	NC_089720.1 — LOC137464306/307
UBE2R2	F	F	F	F	F	F	F	F	F	F	F			NW_026530959.1 — LOC129133638	short reads assembled	NC_066342.1 — LOC103822078	NC_045028.1 — LOC116806979	short reads assembled	NW_026530535.1 — LOC128822743	NW_026530341.1 — LOC128783009	NC_089720.1 — LOC137464308
UBQLN1	RP23	RP23	RP32	L	F	F	F	RP25	RP25	P82	P82			NC_071709.1 — not annotated	NC_050510.2 — not annotated	NC_066342.1 — not annotated	NF	short reads assembled	short reads assembled	NC_071569.1 — LOC128802379	NW_027099315.1 — not annotated
UHRF2	RP6	RP6	RP32	L	L	L	L	L	L	L	L			NW_026530958.1 — not annotated	short reads assembled	NC_066342.1 — not annotated	NF	NF	NF	NF	NF
VCP	F	F	F	F	F	F	F	F	F	F	F			NW_026530961.1 — LOC129133651	NC_050510.2 — LOC118701502	NC_066342.1 — LOC103824680	NC_045028.1 — LOC116806862	short reads assembled	NW_026530535.1 — LOC128822737	NW_026530331.1 — LOC128782881	NC_089720.1 — LOC137464251
ZFAND5	F	F	F	F	F	F	F	F	F	F	F			NW_026530962.1 — LOC129133662	NC_050510.2 — LOC118701538	NC_066342.1 — LOC103812267	NC_045028.1 — LOC116806882	short reads assembled	short reads assembled	NW_026530331.1 — LOC128782883	NC_089720.1 — LOC137464246
ZFR	F	F	F	F	F	F	F	F	F	F	F			NW_026530958.1 — LOC129133620	short reads assembled	NC_066342.1 — LOC103824833	NC_045028.1 — LOC116806641	short reads assembled	NW_026530539.1 — LOC128822764	NW_026530320.1 — LOC128782841	NC_089720.1 — LOC137464248
ZNF131	F	F	F	F	F	F	F	f95	f95	f95	f95	5		NW_026530956.1 — LOC129133607	NW_026530820.1 — LOC118701552	NC_066342.1 — LOC103824902	NC_045028.1 — LOC116806918	short reads assembled	NW_026530534.1 — LOC128822707	NW_026530322.1 — LOC128782862	NW_027099315.1 — LOC137465560
ZNF462	L	L	RP3	L	L	L	L	L	L	L	L			NF	NF	NC_066342.1 — not annotated	NF	NF	NF	NF	NF
ZSWIM6	F	F	F	F	F	F	F	F	F	F	F			NW_026530960.1 — LOC129133643	short reads assembled	NC_066342.1 — LOC103824691	NC_045028.1 — LOC116806985	short reads assembled	NC_071610.1 — LOC128821391	NW_026530338.1 — LOC128782885	NW_027099315.1 — LOC137465598
